# Supplementary material
Source: PubMed Central journal article supplement (PMC6692700)
Supplement: jamaneurol-76-932-s001.pdf [file jamaneurol-76-932-s001.pdf]

1

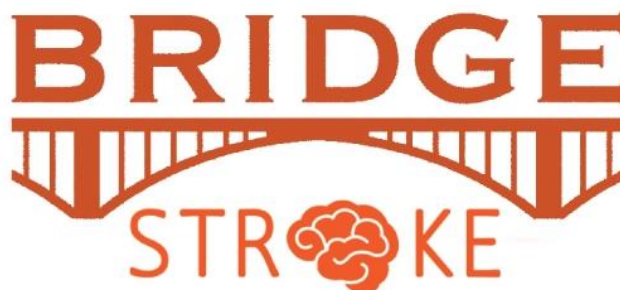

2

3 Brazilian inteRvention to Increase eviDence usaGe in practicE - Stroke

4 A Cluster randomized trial to evaluate the increase in usage of evidence-based practices using a  
5 multifaceted strategy

6

7 Steering Committee: Maria Julia Machline Carrion (Co-Chair, PI)  
8 Otávio Berwanger (Co-Chair, Senior)  
9 Hélio Penna Guimarães  
10 Octavio Marques Pontes Neto  
11 Sheila Cristina Ouriques Martins  
12 Maria Cecilia Bahit  
13 Germán Málaga  
14 Viviane Flumignan Zétola  
15 Gabriel de Freitas  
16 Alessandra Gorgulho  
17 Antonio De Salles  
18 Alexandre Biasi Cavalcanti  
19 Renato Delascio Lopes  
20 Janet Prvu Bettger  
21 Ying Xian  
22 Eric Peterson

23  
24  
25 Coordinating Center: Instituto de Pesquisa – IP - HCOR  
26 R. Abílio Soares, 250, 12 andar - Paraíso  
27 ZIP Code: 04005-000 - São Paulo - SP - Brazil  
28 Phone: +55 11-3886-4693/extension: 8203  
29 Fax: +55 11-3886-4695

30  
31 Protocol Version: 3.0 – November 22<sup>nd</sup>, 2017.

32 **THE CONTENT OF THIS PROTOCOL IS THE SOLE PROPERTY OF IP-HCOR. REPRODUCTION**  
33 **OR USE OF INFORMATION OR DATA CONTAINED WITHOUT FORMAL AUTHORIZATION FROM**  
34 **THE STEERING COMMITTEE CO-CHAIRS HEREIN FOR PURPOSES OTHER THAN THOSE**  
35 **INTENDED BY THE STUDY IS FORBIDDEN WITHOUT FORMAL AUTHORIZATION.**

36

## BRIDGE-STROKE STUDY FLOWCHART

### Phase 1 – Observational Study: Acute Stroke Treatment Registry

Data collection from 40 consecutive patients each hospital

Follow up : discharge, seven days or death

90 days Follow up

### Phase 2 – Cluster Randomized Trial

Central randomization

#### MULTIFACETED STRATEGY

+

Data Collection from 50 Consecutive patients each hospital

Follow Up : Discharge, seven days or death

90 days follow up

#### USUAL CARE

Data Collection from 50 Consecutive patients each hospital

Follow Up : Discharge, seven days or death

90 days follow up

#### Outcomes

- **Primary outcome:** Adherence to evidence-based strategies in the first 48 hours and at discharge
- **Secondary outcomes:** Adherence to evidence-based strategies in the first 48 hours and at discharge; 90 day mortality, degree of disability, stroke recurrence.

End of Phase 2 –All clusters from the usual care group receive the multifaceted intervention

|                                |                                                                                                                                                                                                                                                                                                                                                                                                                                                                                                                                                                                                                                                                                                                                         |
|--------------------------------|-----------------------------------------------------------------------------------------------------------------------------------------------------------------------------------------------------------------------------------------------------------------------------------------------------------------------------------------------------------------------------------------------------------------------------------------------------------------------------------------------------------------------------------------------------------------------------------------------------------------------------------------------------------------------------------------------------------------------------------------|
| <b>Title</b>                   | BRIDGE-STROKE - <u>B</u> razilian <u>i</u> nter <u>v</u> ention to <u>I</u> ncrease <u>e</u> vi <u>D</u> ence <u>u</u> sa <u>G</u> e in <u>p</u> rac <u>t</u> ic <u>E</u> – Stroke - Cluster randomized trial to evaluate the increased use of evidence-based practices using a multifaceted strategy                                                                                                                                                                                                                                                                                                                                                                                                                                   |
| <b>Project Office</b>          | Research Institute at Hospital do Coração (IP-HCor)<br>Rua Abílio Soares, 250 – Paraíso<br>ZIP Code: 04005-000 São Paulo, SP - Brazil<br>Phone: +55 11 3053 6611 Extension: 8203<br>Fax: +55 11 3886 4695                                                                                                                                                                                                                                                                                                                                                                                                                                                                                                                               |
| <b>Executive Committee</b>     | Maria Julia Machline Carrion (Co-Chair, PI), Otávio Berwanger (Co-Chair, Senior), Hélio Penna Guimarães, Octávio Marques Pontes Neto, Sheila Cristina Ouriques Martins, Maria Cecilia Bahit, Luciano Sposato, Germán Malaga, Viviane Flumigan Zétola, Gabriel de Freitas, Alessandra Gorgulho, Antônio De Salles, Alexandre Biasi Cavalcanti, Renato Delascio Lopes Janet Bettger, Yin Xian, Eric Peterson                                                                                                                                                                                                                                                                                                                              |
| <b>Study Design</b>            | The BRIDGE_STROKE study will be conducted in two phases:<br><u>Phase 1:</u> Prospective observational study (registry) aimed at recording the clinical practice of acute management of stroke in patients seen at public and private hospitals. In addition, there will be a longitudinal follow-up of these patients up to hospital discharge or the seventh day of hospitalization. After 90 days data on mortality, disability and stroke recurrence will be collected by a phone call interview.<br><u>Phase 2:</u> Cluster randomized trial to investigate the effectiveness of a program to improve in-hospital care processes at these hospitals, with a 90 day follow up to verify mortality, stroke recurrence and disability. |
| <b>Methodological Quality</b>  | Web-based central randomization and allocation concealment;<br>Blinded and independent committee for assessment and validation of the stroke diagnosis and outcomes;<br>Intention-to-treat analysis;                                                                                                                                                                                                                                                                                                                                                                                                                                                                                                                                    |
| <b>Objectives of the Study</b> | <b>Objectives of the First Phase</b> <ul style="list-style-type: none"> <li>To assess use of evidence-based interventions /Antithrombotics, rt-PA in eligible patients, Door-to-Needle Time &lt; 60 min for rt-PA, prophylaxis for DVT) in acute treatment and at hospital discharge (anticoagulants in patients with atrial fibrillation or flutter, antithrombotic agents, statins (LDL &lt; 100 or not documented).</li> </ul>                                                                                                                                                                                                                                                                                                       |

|                              |                                                                                                                                                                                                                                                                                                                                                                                                                                                                                                                                                                                                                                                                                                                                                                                                                                                                                                                                                                                                                                                                                                                                                                                                                                                                                                                                                                                                                                                                                                                                                                         |
|------------------------------|-------------------------------------------------------------------------------------------------------------------------------------------------------------------------------------------------------------------------------------------------------------------------------------------------------------------------------------------------------------------------------------------------------------------------------------------------------------------------------------------------------------------------------------------------------------------------------------------------------------------------------------------------------------------------------------------------------------------------------------------------------------------------------------------------------------------------------------------------------------------------------------------------------------------------------------------------------------------------------------------------------------------------------------------------------------------------------------------------------------------------------------------------------------------------------------------------------------------------------------------------------------------------------------------------------------------------------------------------------------------------------------------------------------------------------------------------------------------------------------------------------------------------------------------------------------------------|
|                              | <ul style="list-style-type: none"> <li>• To detect the main barriers to the acceptance of interventions.</li> <li>• To prepare a registry of stroke patients in Brazilian hospitals to assess data related to demographic characteristics, morbidity, mortality, and standard practice in the treatment of stroke.</li> </ul> <p><b>Phase 2 Primary Objective:</b></p> <ul style="list-style-type: none"> <li>• To assess whether a multifaceted intervention to improve clinical practice is more effective than usual treatment regarding the prescription of evidence-based therapies for acute stroke treatment in the first 48 hours and prior to discharge including (Early Antithrombotic, RTPA within therapeutic window, DTNT &lt; 60 min, DVT Prophylaxis, Dysphagia Screening, Antrombotic prior to discharge, anticoagulants for atrial fibrillation or flutter, assessment for rehabilitation, LDL &lt; 100 or not documented, smoke cessation education).</li> </ul> <p><b>Phase 2 Secondary Objectives</b></p> <ul style="list-style-type: none"> <li>• To assess whether a multifaceted intervention to improve clinical practice is more effective than usual treatment regarding the prescription of evidence-based therapies for acute stroke treatment in the first 48 hours and prior to discharge in an “all or none” model</li> <li>• To assess whether a multifaceted intervention to improve clinical practice is more effective than usual treatment regarding in reducing stroke recurrence, disability and mortality in 90 days.</li> </ul> |
| <b>Eligibility Criterion</b> | <p><b>Hospitals:</b> The hospitals eligible for the BRIDGE study will consist of public and private hospitals offering 24/7 emergency care, with at least one routine physician in the unit for 24 hours and one on-call neurologist. These hospitals must complete the screening form for appropriate initial assessment of basic conditions for inclusion and adherence to the project.</p> <p><b>Patients:</b> Patients over 18 years old, diagnosed with ischemic stroke (including transient ischemic attack) with symptoms lasting up to 24 hours. We will exclude patients with signs of hemorrhagic stroke, expansive lesions, central nervous system infections, and those coming from institutions that did not provide institutional approval form signed by the patients' guardians.</p>                                                                                                                                                                                                                                                                                                                                                                                                                                                                                                                                                                                                                                                                                                                                                                    |
| <b>Study Intervention</b>    | <p><b>Intervention Group:</b> Multifaceted strategy to improve clinical practices including case manager, reminders, staff training, checklists, and educational materials</p> <p><b>Control Group:</b> usual management of stroke patients</p>                                                                                                                                                                                                                                                                                                                                                                                                                                                                                                                                                                                                                                                                                                                                                                                                                                                                                                                                                                                                                                                                                                                                                                                                                                                                                                                         |
| <b>Follow-up</b>             | Patients will be evaluated within the first 48 hours and at                                                                                                                                                                                                                                                                                                                                                                                                                                                                                                                                                                                                                                                                                                                                                                                                                                                                                                                                                                                                                                                                                                                                                                                                                                                                                                                                                                                                                                                                                                             |

|                    |                                                                                                                                                                                                                                                                                                                                                                                                                                                                                                                                                                                                                                                                                                                                                                                                                                                                                                                                                                                                                                                                                                                                                                                                                                                                                                                                                                                                                                                                                                                                                                                                                              |
|--------------------|------------------------------------------------------------------------------------------------------------------------------------------------------------------------------------------------------------------------------------------------------------------------------------------------------------------------------------------------------------------------------------------------------------------------------------------------------------------------------------------------------------------------------------------------------------------------------------------------------------------------------------------------------------------------------------------------------------------------------------------------------------------------------------------------------------------------------------------------------------------------------------------------------------------------------------------------------------------------------------------------------------------------------------------------------------------------------------------------------------------------------------------------------------------------------------------------------------------------------------------------------------------------------------------------------------------------------------------------------------------------------------------------------------------------------------------------------------------------------------------------------------------------------------------------------------------------------------------------------------------------------|
|                    | discharge, and 90 days after discharge, data on mortality, disability and stroke recurrence.                                                                                                                                                                                                                                                                                                                                                                                                                                                                                                                                                                                                                                                                                                                                                                                                                                                                                                                                                                                                                                                                                                                                                                                                                                                                                                                                                                                                                                                                                                                                 |
| <b>Outcomes</b>    | <p><b>Primary Outcome of the First Phase</b></p> <ul style="list-style-type: none"> <li>• Proportion of prescription of evidence-based strategies. in the first 48 hours and prior to discharge</li> <li>• Barriers to implementation of methodologies.</li> </ul> <p><b>Primary Outcome of the Second Phase</b></p> <ul style="list-style-type: none"> <li>• Proportion of prescription of evidence-based strategies in the first 48 hours and prior to discharge (composite adherence score), including Rt-PA within therapeutic window, DTNT &lt; 60 min, DVT Prophylaxis, Early antithrombotic, Antithrombotic at discharge, Anticoagulants for Atrial fibrillation or flutter, LDL &lt; 100 or not documented agents, Assessment for rehabilitation, Smoke cessation education)</li> </ul> <p><b>Secondary Outcomes of the Second Phase</b></p> <ul style="list-style-type: none"> <li>• Proportion of prescription of evidence-based strategies in the first 48 hours and at discharge “All or none” measures including: Rt-PA, DTNT &lt; 60 min, DVT Prophylaxis, Early antithrombotic, Antithrombotic at discharge, Anticoagulants for Atrial fibrillation or flutter, LDL &lt; 100 or not documented, Assessment for rehabilitation, Smoked cessation education</li> <li>• Proportion of usage of the additional strategies: global Rt-PA rate, anti-hipertensive agents, and door to needle time&lt; 45 min)</li> <li>• In hospital and 90 days mortality</li> <li>• Degree of disability (measured by the Modified Rankin Scale) at discharge and in 90 days.</li> <li>• Stroke recurrence in 90 days.</li> </ul> |
| <b>Sample Size</b> | <p>Phase 1 : Considering possible losses between phase 1 and 2 , it will be included up to 42 clusters.</p> <p>Phase 2: Considering approximately 50 patients per clusters and from 30 to 36 clusters included, we estimate that it will be needed to collect data from 1500 to 1800.</p>                                                                                                                                                                                                                                                                                                                                                                                                                                                                                                                                                                                                                                                                                                                                                                                                                                                                                                                                                                                                                                                                                                                                                                                                                                                                                                                                    |

66

67

|    |                                                                                    |           |
|----|------------------------------------------------------------------------------------|-----------|
| 68 | SUMMARY                                                                            |           |
| 69 |                                                                                    |           |
| 70 | <b>1. Introduction and Rationale .....</b>                                         | <b>10</b> |
| 71 | <b>1.1. Relevance of the Problem - The impact of cardiovascular diseases .....</b> | <b>10</b> |
| 72 | <b>1.2. Stroke Acute Treatment in South America- Where do we stand in 2014</b>     | <b>11</b> |
| 73 | <b>1.3. Quality improvement programs.....</b>                                      | <b>12</b> |
| 74 | <b>1.3.1. International Quality Indicators and Development of Improvement</b>      |           |
| 75 | <b>Programs.....</b>                                                               | <b>12</b> |
| 76 | <b>1.4. Quality improvement based on clinical research - The Experience of</b>     |           |
| 77 | <b>Cluster Studies .....</b>                                                       | <b>14</b> |
| 78 | <b>1.4.1. What are cluster randomized trials and what is the advantage?.....</b>   | <b>14</b> |
| 79 | <b>1.5. Rationale of the BRIDGE-STROKE Study .....</b>                             | <b>18</b> |
| 80 | <b>2. OBJECTIVES .....</b>                                                         | <b>19</b> |
| 81 | <b>2.1. Objectives of the First Phase .....</b>                                    | <b>19</b> |
| 82 | <b>2.2. Objectives of the Second Phase .....</b>                                   | <b>19</b> |
| 83 | <b>2.2.1. Primary Objective .....</b>                                              | <b>19</b> |
| 84 | <b>2.2.2. Secondary Objectives .....</b>                                           | <b>19</b> |
| 85 | <b>3. STUDY PLANNING .....</b>                                                     | <b>20</b> |
| 86 | <b>3.1. Project Description and Planning .....</b>                                 | <b>20</b> |
| 87 | <b>3.2. Design of the Study Phases .....</b>                                       | <b>21</b> |
| 88 | <b>3.3. Eligibility .....</b>                                                      | <b>21</b> |
| 89 | <b>3.3.1. Eligibility Criteria for Participating Hospitals.....</b>                | <b>21</b> |
| 90 | <b>3.3.2. Eligibility Criteria for Participants .....</b>                          | <b>22</b> |
| 91 | <b>3.3.3. Criteria for cluster maintenance.....</b>                                | <b>23</b> |
| 92 | <b>3.3.4. Sample Characteristics .....</b>                                         | <b>23</b> |
| 93 | <b>3.3.4.1. Hospitals .....</b>                                                    | <b>23</b> |
| 94 | <b>3.3.4.2. Patients .....</b>                                                     | <b>23</b> |
| 95 | <b>3.4. Method of randomization and concealment allocation.....</b>                | <b>23</b> |
| 96 | <b>3.6. Study Procedures.....</b>                                                  | <b>24</b> |
| 97 | <b>3.7. Description per visit .....</b>                                            | <b>25</b> |
| 98 | <b>3.8. Quality Improvement Tools.....</b>                                         | <b>26</b> |
| 99 | <b>3.8.1.1. Case Manager .....</b>                                                 | <b>26</b> |

|     |                                                                               |           |
|-----|-------------------------------------------------------------------------------|-----------|
| 100 | <b>3.8.1.2. Reminders .....</b>                                               | <b>27</b> |
| 101 | <b>3.8.1.3. Interactive Training Workshops.....</b>                           | <b>27</b> |
| 102 | <b>3.8.1.4. Educational Material.....</b>                                     | <b>28</b> |
| 103 | <b>3.8.1.4.1. Algorithm for the Treatment of Stroke Patients (Therapeutic</b> |           |
| 104 | <b>Plan/Checklist).....</b>                                                   | <b>28</b> |
| 105 | <b>3.8.1.4.2. Educational Posters .....</b>                                   | <b>28</b> |
| 106 | <b>3.8.1.4.3. Educational Material.....</b>                                   | <b>28</b> |
| 107 | <b>3.8.1.4.4. Feedback Reports .....</b>                                      | <b>28</b> |
| 108 | <b>3.9. Outcomes .....</b>                                                    | <b>28</b> |
| 109 | <b>3.9.1. Primary Outcome of the First Phase .....</b>                        | <b>28</b> |
| 110 | <b>3.9.2. Secondary Outcomes of the First Phase .....</b>                     | <b>29</b> |
| 111 | <b>3.9.3. Primary Outcome of the Second Phase .....</b>                       | <b>29</b> |
| 112 | <b>3.10. Variables of Interest .....</b>                                      | <b>30</b> |
| 113 | <b>3.11. Follow-up.....</b>                                                   | <b>35</b> |
| 114 | <b>3.12. Endpoint Definition .....</b>                                        | <b>35</b> |
| 115 | <b>3.13. Statistical Analysis Plan .....</b>                                  | <b>36</b> |
| 116 | <b>3.14. Sample Size.....</b>                                                 | <b>39</b> |
| 117 | <b>3.15. Data Collection System .....</b>                                     | <b>41</b> |
| 118 | <b>4. ETHICAL ASPECTS AND GOOD CLINICAL PRACTICES.....</b>                    | <b>41</b> |
| 119 | <b>4.1. Study Approval.....</b>                                               | <b>41</b> |
| 120 | <b>4.2. Informed Consent and Institutional Authorization Form.....</b>        | <b>42</b> |
| 121 | <b>4.3. Study Approval.....</b>                                               | <b>42</b> |
| 122 | <b>4.4. Study Registration .....</b>                                          | <b>43</b> |
| 123 | <b>4.5. Data Confidentiality .....</b>                                        | <b>43</b> |
| 124 | <b>4.6. Reports.....</b>                                                      | <b>43</b> |
| 125 | <b>5. STUDY COORDINATION.....</b>                                             | <b>43</b> |
| 126 | <b>5.1. Coordinating Center .....</b>                                         | <b>43</b> |
| 127 | <b>5.2. Steering Committee .....</b>                                          | <b>44</b> |
| 128 | <b>5.3. Executive Committee.....</b>                                          | <b>44</b> |
| 129 | <b>5.4. Publication Committee.....</b>                                        | <b>45</b> |
| 130 | <b>5.5. Adjudication Process.....</b>                                         | <b>45</b> |

|     |                                                                                      |           |
|-----|--------------------------------------------------------------------------------------|-----------|
| 131 | <b>5.6. Data Quality Management.....</b>                                             | <b>46</b> |
| 132 | <b>5.7. Responsibilities of the Study Sponsor.....</b>                               | <b>47</b> |
| 133 | <b>5.8. Responsibilities of Investigators and Sub-investigators at Participating</b> |           |
| 134 | <b>Centers. ....</b>                                                                 | <b>47</b> |
| 135 | <b>5.9. Monitoring.....</b>                                                          | <b>47</b> |
| 136 | <b>5.10. Publication of Results.....</b>                                             | <b>48</b> |
| 137 | <b>6. AMENDMENTS TO THE PROTOCOL .....</b>                                           | <b>48</b> |
| 138 | <b>7. REFERENCES.....</b>                                                            | <b>49</b> |

139

CONFIDENTIAL



## Acronyms and Abbreviations

- 140  
141 **ASA** - Acetylsalicylic Acid  
142 **TIA** - Transient Ischemic Attack  
143 **GCP** - Good Clinical Practice  
144 **CEC** - Clinical Endpoint Committee  
145 **EDC** - Electronic Data Capture  
146 **CRF** - Case Report Form  
147 **CVD** - Cardiovascular Disease  
148 **DNT** - Door-to-Needle Time  
149 **GCP** - Good Clinical Practice  
150 **AMI** - Acute Myocardial Infarction  
151 **OR** - Odds Ratio  
152 **Rt-PA** - Recombinant thromboplastin/Alteplase  
153 **RRR** - Relative Risk Reduction  
154 **ACS** - Acute Coronary Syndrome  
155 **AIS** – Acute Ischemic Stroke  
156  
157  
158

159 **1. Introduction and Rationale**

160

161 **1.1. Relevance of the Problem - The impact of cardiovascular diseases**

162

163 Due to the epidemiological transition experienced by most countries in recent  
164 decades, chronic diseases, especially cardiovascular diseases (CVDs), including stroke  
165 and acute coronary syndrome (ACS) became the most important public health issue.  
166 According to the World Health Organization, cardiovascular diseases currently  
167 represent the primary cause of death and disability worldwide(1).

168 Regarding stroke, the estimated prevalence in the United States was 2.8% of the  
169 population in 2010, with an estimated increase of 4 million people with a diagnosis of  
170 stroke in 2030, representing an increase of 21.9% in the prevalence starting in 2013.  
171 Every 40 seconds someone in the U.S. has a stroke and every 4 minutes someone dies  
172 from stroke

173 In South America stroke has been poorly studied. A systematic review of  
174 incidence, prevalence and stroke subtypes, shows that overall stroke prevalence rates  
175 range from 1.74 to 6.51 per 1000, and annual incidence rates from 0.35 to 1.83 per  
176 1000. In Peru, crude prevalence rate is 6.2 per 1000(2). In Brazil there is no accurate  
177 appreciation on stroke incidence. In Argentina, data from an ongoing study in Tandil are  
178 awaited (3). Regarding stroke mortality, data from a Brazilian study showed that in  
179 1990, the mortality rate from cerebrovascular diseases was 54.3 deaths/100,000  
180 inhabitants(4) and, in 2011, the estimated mortality rate was 52.4 deaths/100,000  
181 inhabitants(5). Thus, there has not been a significant change in recent years.

182 The increased incidence and burden of stroke in South America is particularly  
183 important. Indeed, there has been a substantial global variation in the impact of stroke  
184 when compared with ACS; the mortality rate and impact of these diseases do not evolve  
185 smoothly. On a global basis, ACS typically exceeds stroke in terms of mortality and  
186 disability. However, in 39% of countries, stroke exceeds ACS in terms of mortality  
187 and, in 32% of the countries, stroke exceeds ACS in terms of disability.(6) . In fact, in

188 developing countries, stroke is responsible for greater overall burden, which may be  
189 related in part to development profiles and risk factors.

190  
191  
192

## **1.2. Stroke Acute Treatment in South America- Where do we stand in 2014**

193 The available knowledge about the epidemiology of stroke in South America, as  
194 well as its standard management, comes from few and limited prospective studies often  
195 conducted in a single hospital or a single city, thus inserted in different socioeconomic  
196 contexts. Such differences are evident in the data presented in **Table 1** which refers to  
197 studies conducted in Brazil. There is a significant variation in the rate of use of  
198 thrombolytic therapy in these studies: from 1.1% in the study by Carvalho et al.(7) to  
199 4.6, 5.8% and 6.0% in the studies by Carvalho et al, Conforto et al and Moro et al  
200 respectively (8-10). The first study was conducted in the region of the city of Fortaleza,  
201 comprising 31 hospitals showing distinct profiles. The second study shows data from a  
202 private hospital located in São Paulo after the implementation of the U.S. quality  
203 improvement program "Get with the Guidelines" ; whereas the third study shows the  
204 experience of the Hospital das Clínicas de São Paulo and the forth is restricted to the  
205 city of Joinville where the first Brazilian stroke unit was developed. A national profile  
206 of stroke management can only be defined after conducting a study covering all regions  
207 of the country, based on systematic data collection, and using standardized variables and  
208 outcome measures. This step is critical to the understanding of our reality and the  
209 development of improvement strategies.

210

211

212

213

214

215 **Table 1 - Standards for management of ischemic stroke in Brazilian studies**

| Study                          | Use of thrombolytic therapy | Prescription of antithrombotic agents within the first 48 hours | Statin prescription |
|--------------------------------|-----------------------------|-----------------------------------------------------------------|---------------------|
| <b>Carvalho et al. 2011(7)</b> | 1.1%                        | 78.6%                                                           | 52.0%               |
| <b>Carvalho et al. 2012(8)</b> | 4.6%                        | 98.2%                                                           | 56.1%               |
| <b>Conforto et al. 2008(9)</b> | 5.8%                        | Not applicable                                                  | Not applicable      |
| <b>Moro et al.2013(10)</b>     | 6.0%                        | Not applicable                                                  | Not applicable      |

216

217 In Argentina however, data from a national registry (ReNACer), from 2004 till  
218 2006, including 1991 patients from 74 institutions provided important information on  
219 the quality of stroke care. This study showed that only 1.05% of patients received  
220 thrombolytic therapy and 78.9% were treated with aspirin in the first 48 hours after the  
221 acute ischemic stroke(11). This is similar to Brazilian studies mentioned above.

222

### 223 **1.3. Quality improvement programs**

224

#### 225 **1.3.1. International Quality Indicators and Development of Improvement** 226 **Programs**

227

228 In order to reduce the burden of stroke in the United States, several  
229 organizations began to develop and implement registries with the purpose of measuring  
230 the quality of care provided to stroke patients and encouraging improvements(12, 13).  
231 The "Get with the Guidelines" (GWTG) Program was developed by the American Heart  
232 Association/American Stroke Association (AHA/ASA) as a national registry linked to a  
233 performance improvement program with the primary goal of improving the quality of  
234 care and outcomes of stroke patients(14, 15).

235 In 2007, the AHA/ASA joined efforts with the Joint Commission's Primary  
236 Stroke Center Certification Program and the Center for Disease Control Coverdell  
237 Registry and developed a series of quality indicators used by these three programs. Such  
238 indicators made it possible to evaluate the performance of hospitals in terms of stroke  
239 management(15, 16). These indicators were developed taking into account the evidence-  
240 based therapeutic measures (and with class IA indication) included in the international  
241 guidelines of the AHA/ASA(17) and endorsed by the National Quality Forum. Thus, the  
242 following performance measures began to be used(15).

243 Acute Performance Measures:

- 244 • IV tPA (intravenous recombinant tissue plasminogen activator) in  
245 patients who arrive at the hospital with less than two hours of symptoms  
246 and are treated within three hours.
- 247 • Early Antithrombotic Medication
- 248 • Prophylaxis for Deep Venous Thrombosis.

249  
250 Performance Measures upon Discharge:

- 251 • Antithrombotic Medication
- 252 • Anticoagulation in Patients with Atrial Fibrillation.
- 253 • Lipid-lowering medication prescribed upon discharge if LDL > 100  
254 mg/dL, if the patient was previously treated with lipid-lowering  
255 medication, or if LDL has not been documented.
- 256 • Counseling or smoking cessation medication.
- 257 • Assessed for rehabilitation needs/services

258 The GWTG Program is an initiative that has demonstrated interesting results  
259 since its implementation in 2003. After the inclusion of more than one million patients  
260 in over one thousand hospitals in the United States by 2009, there was a change in the  
261 proportion of prescription of "all or nothing" measures from 44% to 84.3%.  
262 Furthermore, a multivariate analysis showed that the cumulative odds for all or nothing  
263 measures was 9.7% (CI 8.0 to 11.8,  $p < 0.0001$ ) regardless of the characteristics of the  
264 patient or the hospital(15) However, an important limitation of this study is that it does

265 not include a comparison group (e.g., hospitals that are not participating in the  
266 program), thus it is not possible to quantify and compare the trends of improvements  
267 that may occur outside the GWTG (18). That is, the major limitation of this study is that  
268 it is not a randomized clinical trial.

269 In fact, important data regarding the management of stroke outside the GWTG  
270 Program in the United States have been presented. Such data draw attention to an  
271 alarming situation. Although 81% of the population can get to the hospital capable of  
272 administering rt-PA within one hour, only 4% of patients receive this intervention(19).  
273 This shows the continuous need to implement and expand quality improvement  
274 programs, even in developed countries.

275 Because of the deep economic and social impact of stroke in Brazil, in 2008, the  
276 General Coordination of Emergency of the Ministry of Health began to organize the  
277 National Network of Stroke Management. Currently, the Brazilian Stroke Network  
278 includes more than 40 hospitals nationwide(20). The objective of this initiative is to  
279 implement a program for the management of stroke patients, aiming to address all levels  
280 of care: recognition of the population, pre hospital care, hospital care, rehabilitation, and  
281 prevention(21). This certainly was an important step to improve stroke management in  
282 Brazil because, in the participating hospitals, the patients not only started to be treated  
283 faster but also to be seen by a more qualified health care team with better therapeutic  
284 options. However, there are no published data on the performance of the program over  
285 the past years.

286

287

#### 288 **1.4. Quality improvement based on clinical research - The Experience of** 289 **Cluster Studies**

##### 290 **1.4.1. What are cluster randomized trials and what is the advantage?**

291 Most studies evaluating quality improvement strategies were "before and after"  
292 studies. Although interesting considering the logistics and low cost, this type of design  
293 is unable to provide a definitive answer as to the effectiveness and efficiency of  
294 interventions. This is because some patients' characteristics that are not considered in

295 the analyses may change the results (confounding variables), or may even be  
296 responsible for improving the outcomes of interest, thus causing confounding bias.

297 The only method capable of controlling known and unknown factors that may have  
298 an influence on the outcomes is central randomization with allocation concealment.

299 The randomization of patients conducted in traditional clinical trials is not effective  
300 to test educational interventions aimed at changing behaviors or clinical practices. There  
301 might be inter-group contamination, i.e., patients allocated to the control group may  
302 also receive the intervention under study. Therefore, there is an increase in random type  
303 II error because inter-group contamination tends to dilute the effect of the intervention.

304 In this sense, there should be cluster randomization (i.e., cluster randomized study)  
305 instead of individual patient randomization.

306 In this type of study, clusters or groups of individuals are randomly allocated to one  
307 of the groups, being especially useful to evaluate public health or health care quality  
308 improvement programs.

309 Patients generally choose the hospital where they will be treated based on  
310 geographical issues or because it is a center of excellence. Thus, disease severity is  
311 randomly distributed within the cluster (health care unit), i.e., there are seriously ill  
312 individuals and low-risk patients within the same cluster. Hence, there is an interaction  
313 between the individuals of the same cluster, making them similar as to the way they  
314 respond to interventions. The factors tend to influence individuals within the same  
315 cluster in a similar manner.

316

#### 317 **1.4.2. The example of studies about stroke**

318

319 Cluster randomized clinical trial is a study design that has been increasingly  
320 used in studies focused on prevention and evaluation of the management of certain  
321 diseases. This method is especially relevant for studies on stroke and has been used by  
322 some researchers to evaluate various parameters of management improvement,

323 particularly in support areas such as rehabilitation, speech therapy, and nursing care(22-  
324 24). There are also some initiatives seeking to obtain better results in terms of  
325 prescription of therapeutic measures such as use of antithrombotic agents, use of  
326 fibrinolytic agents, discharge prescription(25-27). **Table 2** shows a summary of the  
327 cluster studies for stroke treatment performed so far.

328 **Table 2 - Randomized cluster studies conducted at hospitals - Examples of studies**  
329 **about Stroke**

| Study                      | Intervention                                                                                     | Sample (no. of clusters/patients per cluster) | Primary Outcome                                                     |
|----------------------------|--------------------------------------------------------------------------------------------------|-----------------------------------------------|---------------------------------------------------------------------|
| PRISM Group 2003(25)       | Computer-based decision support system to aid in the selection of antithrombotic agents          | 16/39                                         | Change in relative risk of ischemic and hemorrhagic events          |
| Jones et al. 2005 (23)     | Training package for nurses and assistants to improve their understanding of stroke patient care | 10/8                                          | Rivermead Mobility Index in 6 months                                |
| Pennington et al. 2005(22) | Training in evaluation and use of guidelines for speech and language departments                 | 15/47                                         | Extent of the compliance to the guidelines by language departments. |
| Strasser et al. 2008(24)   | Multimodal training program for health care team in the care of patients in rehabilitation       | 27/21                                         | Change in motor skill upon discharge compared to admission.         |
| De Luca et al. 2009(28)    | Training of health care teams in prehospital care                                                | 18/42                                         | Proportion of eligible stroke patients referred to a stroke unit    |



|                             |                                                                                                                                                                       |                                                                 |                                                                                                                                                           |
|-----------------------------|-----------------------------------------------------------------------------------------------------------------------------------------------------------------------|-----------------------------------------------------------------|-----------------------------------------------------------------------------------------------------------------------------------------------------------|
| Johnston et al.<br>2010(27) | Quality Improvement through a platform for discharge prescription.                                                                                                    | 12/114                                                          | Binary composite endpoint including: prescription of statins, blood pressure control, prescription of anticoagulants to patients with atrial fibrillation |
| PRACTISE(26)                | Training of teams and formation of local teams to increase the rates of prescription of thrombolytic agents                                                           | 12/459                                                          | rt-PA treatment in patients admitted within four hours of symptom onset.                                                                                  |
| QASC(29)                    | Training of a multidisciplinary team to identify the barriers and adaptations for identification and management of fever, hyperglycemia, and swallowing difficulties. | 19/89                                                           | Improvement in the control of fever, hyperglycemia, and swallowing disorders                                                                              |
| CLOQS(30)<br>Ongoing        | Placement of timers in patients admitted with ischemic stroke                                                                                                         | 1,500 patients with stroke/200 patients undergoing thrombolysis | Percentage of patients who achieve the parameters of best practices (door-to-needle time < 60 minutes)                                                    |

330

331           The PRACTISE study evaluated the rate of prescription of fibrinolytic agents in  
332 patients with up to 4 hours of symptom onset in clusters that received training of their  
333 teams of stroke treatment compared to clusters that did not receive training. This study  
334 showed a thrombolysis rate of 44.5% in the intervention group vs. 39.5% in the control  
335 group(26). Although statistically significant, such rate has clinically limited results. The  
336 QUISP study, in turn, evaluated the use of a platform for discharge prescription. The

337 difference in the use of best practices between the intervention and control groups was  
338 statistically significant (45% and 37%, respectively) when considering the patients (and  
339 the clinical significance was not much significant), but the difference was not  
340 statistically significant when considering the hospitals (40% vs. 39%)(27).

### 341 **1.5. Rationale of the BRIDGE-STROKE Study**

342 As mentioned before, "before and after" studies have the limitation of being long  
343 and not providing conclusive answers about the comparison between the new  
344 intervention and the well-established interventions. Thus, cluster studies are  
345 certainly interesting, but provide greater methodological difficulty. In addition to  
346 assessing isolated interventions, the cluster studies on stroke performed to date have  
347 methodological limitations that can certainly influence their limited results(31).  
348 Therefore, there is need for a study using appropriate methodology and robust  
349 intervention strategy.

350 The Coordinating Center of the Study is an institution of excellence in  
351 conducting large clinical trials in Brazil. The studies conducted at the Research  
352 Institute at Hospital do Coração (IEP-HCor) are meant to answer important research  
353 questions in the context of public health. Likewise, the IEP-HCor is one of the few  
354 research centers in the world with proven experience in conducting studies to  
355 improve clinical practice based on cluster studies. Such experience has already been  
356 demonstrated in the BRIDGE-ACS project, which implemented a multifaceted  
357 strategy for the use of evidence-based therapies to treat coronary syndrome. This  
358 strategy allowed for an increase from 49.5% to 67.5% in the prescription of best  
359 practices(32). This project was presented at the "Late Breaking Trials - 2012"  
360 session of the American College of Cardiology, with an important international  
361 impact, especially because it was a project supported and funded by the Brazilian  
362 Ministry of Health. Recently, this project also received the Incentive Award in  
363 Science and Technology for SUS-2012 as the Best Published Study.

364 The Steering Committee of the BRIDGE-STROKE study consists of  
365 researchers with extensive experience in clinical studies on internal medicine,

366 emergency medicine, cardiology, neurology, vascular diseases, and rehabilitation  
367 who have articles published in high impact journals.

## 368 2. OBJECTIVES

369

### 370 2.1. Objectives of the First Phase

- 371 • To assess the prescription pattern of evidence-based interventions  
372 (Aspirin/Antithrombotic, Rt-PA within the therapeutic window, Door-to-  
373 Needle Time < 60 min, prophylaxis for DVT, dysphagia screening) in acute  
374 treatment and at hospital discharge (anticoagulants in patients with atrial  
375 fibrillation or flutter, antithrombotic agents, LDL < 100 or not documented,  
376 assessment for rehabilitation and smoke cessation education).
- 377 • To detect the main barriers to the acceptance of interventions.
- 378 • To prepare a registry of the patients with stroke seen in Brazilian hospitals to  
379 assess data related to demographic characteristics, morbidity, mortality, and  
380 standard practice in the treatment of stroke.

381

### 382 2.2. Objectives of the Second Phase

#### 383 2.2.1. Primary Objective

- 384 • To assess whether a multifaceted strategy to improve clinical practice is  
385 more effective than usual treatment regarding the prescription of evidence-  
386 based therapies in the first 48 hours and at discharge (Early Antithrombotic,  
387 Rt-PA within the therapeutic window, Door-to-Needle Time < 60 min,  
388 prophylaxis for DVT, dysphagia screening, antithrombotic at discharge,  
389 statins (LDL < 100 or not documented), anticoagulants for atrial fibrillation  
390 or flutter, assessment for rehabilitation, patient education or medication for  
391 smoke cessation, **(Composite Adherence Score)**

#### 392 2.2.2. Secondary Objectives

- 393 • To assess whether a multifaceted strategy to improve clinical practice is  
394 more effective than usual treatment regarding the prescription of evidence-  
395 based therapies in the first 48 hours and at discharge (including : Early

396 Antithrombotic, rt-PA within therapeutic window, Door-to-Needle Time <  
397 60 min, prophylaxis for DVT, dysphagia screening, antithrombotic at  
398 discharge, statins[LDL 100 or not reported], anticoagulants for atrial  
399 fibrillation or flutter, assessment for rehabilitation, education or medication  
400 for smoke cessation in an “All or None” Model.

- 401 • To assess whether a multifaceted intervention to improve clinical practice is  
402 more effective than usual care for adherence to additional therapies such as  
403 door to needle time < 45 minutes and antihypertensive usage.
- 404 • To assess whether a multifaceted intervention is more effective than usual  
405 care to decrease mortality, stroke recurrence and disability.

406

### 407 **3. STUDY PLANNING**

408

#### 409 **3.1. Project Description and Planning**

410

411 The BRIDGE-STROKE study is a project focused on improving health care  
412 quality based on the implementation of evidence-based interventions in public tertiary  
413 hospitals and private hospitals in Brazil, Argentina and Peru. Stroke has been chosen as  
414 the focus of the study because it is the most important cause of mortality and disability  
415 in Latin America.

416 The BRIDGE-STROKE study will consist of two phases. In the first phase  
417 (Phase 1), we will conduct an observational registry study aimed at documenting the  
418 clinical practice of acute management of stroke and detecting the main barriers in  
419 incorporating evidence-based interventions into practice.

420 In the second phase (Phase 2), we will conduct a randomized cluster trial where  
421 participating hospitals will be randomized to receive or not a multifaceted intervention.  
422 This second phase is aimed at investigating if this package of clinical practice  
423 improvement (multifaceted intervention) is able to increase the prescription and  
424 recommendation of interventions with proven benefit in the first 48 hours of admission  
425 and at discharge).

426 In addition, the study will include a follow-up until discharge or until the  
427 seventh day of admission (whichever comes first) to evaluate whether the multifaceted  
428 intervention is able to increase the prescription of Aspirin/Antithrombotic,  
429 anticoagulants for atrial fibrillation, lipid lowering agents, assessment for rehabilitation,  
430 education or medication for smoke cessation, and to reduce mortality and degree of  
431 disability. as well as to assess mortality rate, stroke recurrence and disability at 90 days  
432 of follow-up. If this is the case, this package may be offered as a tool for improving  
433 clinical practice in hospitals in Latin America.

434 At the end of phase 2 we will offer the multifaceted strategy toolkit for all  
435 centers.

436

### 437 **3.2. Design of the Study Phases**

438

439 Phase 1: Prospective observational study (registry) aimed at recording the clinical  
440 practice of acute management of stroke in patients seen at public and private hospitals.  
441 In addition, there will be a longitudinal follow-up of these patients up to hospital  
442 discharge or the seventh day of hospitalization as well as a telephone call in 90 days.

443 Phase 2: Cluster randomized trial aimed at testing the effectiveness of a program to  
444 improve clinical practice at these hospitals.

445

### 446 **3.3. Eligibility**

447

#### 448 **3.3.1. Eligibility Criteria for Participating Hospitals**

449 The hospitals eligible for the BRIDGE-Stroke study will consist of public and  
450 private hospitals offering 24/7 emergency care, with at least one routine physician in the  
451 unit for 24 hours and one on-call neurologist. These hospitals should have availability  
452 of a CNS imaging (cranial computed tomography/ MRI). They should also have  
453 alteplase for performing intravenous reperfusion therapy. These hospitals will complete

454 the screening form for appropriate initial assessment of basic conditions for inclusion  
455 and adherence to the project.

456

### 457 **3.3.2. Eligibility Criteria for Participants**

458 Patients diagnosed with ischemic stroke (including transient ischemic attack and  
459 ischemic stroke with hemorrhagic transformation) with symptoms lasting up to 24  
460 hours. We will exclude patients with signs of hemorrhagic stroke, expansive lesions and  
461 central nervous system infections.

462 Definitions:

463 Ischemic stroke is defined as a sudden onset of acute focal neurological deficit of  
464 ischemic vascular origin:

- 465 a) that is not reversible in 24 hours or resulting in death (in <24 hours) and is not due to  
466 an identifiable cause of death (e.g., tumor or trauma) **OR**  
467 b) that resolves in <24 hours and is accompanied by clear evidence of stroke on the  
468 brain imaging study.

469 Transient ischemic attack (TIA) is defined as:

- 470 a. focal neurological deficit lasting <24 hours and not due to identifiable non-vascular  
471 cause (e.g., brain tumor, trauma), **AND**  
472 b. no new infarction on brain imaging study (if available).

473 Hemorrhagic transformation of ischemic stroke is cerebral infarction with blood that  
474 seems to represent hemorrhagic transformation instead of primary hemorrhage.  
475 Hemorrhagic conversion usually occurs in the cortical surface. Deeper hemorrhagic  
476 transformation requires evidence of non-hemorrhagic infarction in the same vascular  
477 territory. Apparent microbleeds on nuclear magnetic resonance (NMR), both in the  
478 cortex and in the deeper cerebral structures, will not be considered consistent with the  
479 outcome of hemorrhagic transformation.

480

481 **3.3.3. Criteria for cluster maintenance**

482 By the end of phase 1 all included hospitals will be evaluated in relation  
483 to data collection quality and effectiveness, as well as effective in the  
484 operational procedures. For phase 2 hospitals will be maintained according to a  
485 ranking based on the primary outcome observed during phase 1 until the needed  
486 number of clusters is reached.

487

488 **3.3.4. Sample Characteristics**

489

490 **3.3.4.1. Hospitals**

491 The centers will be selected using the following sources: Record of the research  
492 centers of the Hospital do Coração, records of the research centers from the ReNaCer  
493 study and recommendation of the Brazilian Stroke Network.

494 Those centers invited to participate should complete the screening form to  
495 confirm the possibility of using the tools available for the BRIDGE-STROKE study.

496

497 **3.3.4.2. Patients**

498 In phase 1 and 2, consecutive patients seen in the hospitals participating in the study  
499 and who meet the inclusion criteria will be enrolled. The enrollment in the study will be  
500 conducted 7 days a week, regardless of the time the patient arrives at the emergency  
501 department. Data will be collected from the medical records

502

503 **3.4. Method of randomization and concealment allocation**

504 In phase 2, the hospitals will be stratified in percentiles (tertiles or quartiles)  
505 according to the performance verified during phase 1. Once the hospital is allocated to  
506 one of the groups, all patients seen at that hospital will be treated following the same  
507 procedure. All hospitals will be randomized simultaneously.

508 The list of hospital randomization will be generated considering a random  
509 function with equal probability of allocation to one of the groups. Each center will be  
510 numbered and only the numbers will be used for randomization, which will be  
511 performed by a statistician of the HCor, thus ensuring allocation concealment. The  
512 study coordinator will inform the center which measures should be taken without  
513 informing the statistician about the hospitals that will receive evidence-based training.

514 At the end of phase 2, the centers that were randomized not to receive the  
515 intervention will receive all the tools to improve clinical practice after the end of phase  
516 2.

517

### 518 **3.5. Masking**

519

520 This is an open study, and thus the investigators and patients will not be  
521 blinded to the allocation of treatment. Information regarding 03 month follow up  
522 outcomes will be obtained through standard forms and procedures applied in a  
523 telephone interview by a trained and blinded health care professional from the  
524 coordinating office. All stroke recurrence diagnosis will also be validated by a  
525 blinded Committee.

526

### 527 **3.6. Study Procedures**

528

529 The centers invited to participate must complete the hospital screening form.  
530 The Research Institute at Hospital do Coração (IEP-HCor) will receive the data on the  
531 cluster and confirm the participation of the cluster in the study.

532 In Phase 1 and Phase 2, an independent data collector (a person that is not  
533 involved in the patient assistance) must collect patient data, completing the "Registry  
534 CRF" and "Discharge CRF" and "90 Day Follow Up CRF". During phase 2, data  
535 collection for the 90 day Follow up will be collected by a trained healthcare professional  
536 from the central office



537 In phase 2, the clusters randomized to the control group will keep their usual  
538 practice standards, while the clusters allocated to the intervention group will receive the  
539 toolkit described above to be used by the health professionals involved in stroke  
540 patients' assistance. Both groups must complete the following forms: "Admission",  
541 "Registry", "Discharge". In this phase will be included information regarding adherence  
542 to the multifaceted intervention. Furthermore, study coordinator and data collectors  
543 from the sites, when asked, must provide appropriate documents for adjudication  
544 purposes.

545 Patient screening will be performed at the Emergency Department in a  
546 consecutive model.

### 547 **3.7. Description per visit**

#### 548 Baseline Visit

549 The team should check the following patient information:

- 550 - Inclusion/exclusion criteria
- 551 - Contraindication to pre specified evidence-based therapies.
- 552 - Demographic data
- 553 - Clinical history
- 554 - Physical examination
- 555 - Stroke severity (NIHSS)
- 556 - Vital signs
- 557 - Cranial Computed Tomography (CT) /
- 558 - Additional laboratory tests
- 559 - Use of tools

#### 560 Discharge

- 561 - Hospital complications
- 562 - Medication at discharge or on the seventh day of admission, and contraindications to  
563 the use of evidence-based therapies.
- 564 - Assessment and delivery of any rehabilitation/physical therapy.
- 565 - Education provided to the patient.
- 566 - Disability.

567 Follow-up visit, Day 90 + 7 days

568 - Mortality data, degree of disability and stroke recurrence.

569 - During phase 1 these data will be collected by each cluster team, during phase 2  
570 these data will be collected by a phone call from a healthcare professional from the  
571 central office blinded to site allocation.

572

573 It is important to highlight that data collection will be performed by an independent  
574 data collector, in order to prevent contamination. Thus the health team delivering  
575 treatment to the patients will not be involved in data collection.

### 576 **3.8. Quality Improvement Tools**

577

578 Based on the results of previous evidence testing the efficacy and/or  
579 effectiveness of a series of improvement tools of clinical practice, we will develop a  
580 multifaceted strategy including various tools that will provide the health professionals  
581 responsible for stroke patients in each center with:

- 582 - Knowledge of effective therapies;
- 583 - Clinical decision support;
- 584 - Updated and critically evaluated information on therapeutic interventions for  
585 stroke patients.

586 These tools will be applied in a pre-determined date after an investigators'  
587 meeting and health care team training

588

#### 589 **3.8.1.1. Case Manager**

590

591 Health care professionals from each institution, including physicians and leader  
592 nurses, will be responsible for the timely delivery of the material and for checking the  
593 implementation of effective management, supporting the management when it is needed  
594 and also acting as quality monitors

595 The case manager is key to improving clinical practice. Using charisma and  
596 persuasion, the case manager should motivate, in a polite manner, the use of the proven  
597 effective therapies described herein.

598

599

#### 600 **3.8.1.2. Reminders**

601 to facilitate the visualization of important interventions and their relation to the  
602 time of care. Different types of reminders may be used: patient wristband, "stroke"  
603 label on the admission record, and a therapeutic plan (algorithm checklist) to be  
604 attached to the admission form or medical record.

605 The "stroke" label will be placed in the patient's admission record at the time of  
606 screening for all patients with suspected ischemic stroke or TIA. If the diagnosis is not  
607 confirmed, the wristband should be taken off and the therapeutic plan will no longer be  
608 followed. If the diagnosis is confirmed, then the wristband and the therapeutic plan  
609 should be kept and followed together with the patient medical record.

610 Checklists including the optimal treatment recommendations for stroke patients  
611 will be made available. Such checklists will be attached to the local prescription as a  
612 therapeutic suggestion to be individually adjusted.

613

614

615

#### **3.8.1.3. Interactive Training Workshops**

Interactive training workshops may happen as follows;

616

617

618

619

- During an investigators' meeting where the principal investigator and case manager from each site allocated to the intervention group will receive a simulation-based training developed in small groups and will have access to the tools.

620

621

622

623

- During individualized training sessions developed in each hospital. It will also be stimulated that each participating site disseminates the intervention to other professionals from the institution. Additionally, this training session has the objective of reviewing the clinical pathway

624 within each hospital allocated to intervention, thus facilitating the  
625 assimilation of the quality improvement tools

626

#### 627 **3.8.1.4. Educational Material**

628

##### 629 **3.8.1.4.1. Algorithm for the Treatment of Stroke Patients** 630 **(Therapeutic Plan/Checklist)**

631

632 Printed versions of these algorithms will be available, and will be distributed to  
633 centers as pocket books for quick reference.

634

##### 635 **3.8.1.4.2. Educational Posters**

636 These posters will be distributed by the emergency department in order to draw  
637 the attention and help the teams regarding techniques that can support better practices.

638

##### 639 **3.8.1.4.3. Educational Material**

640 • For each hospital we will provide printed, physical or electronic material  
641 containing fundamental concepts of acute stroke treatment.

642 • The BRIDGE Stroke training techniques will also be available in a video  
643 that will be used during the training sessions. This video will also be  
644 available for the hospitals so that they can use it as a continuous  
645 improvement tool.

##### 646 **3.8.1.4.4. Feedback Reports**

647

648 To each hospital allocated to the intervention group, periodical reports on  
649 performance will be provided. This strategy will stimulate the teams to seek  
650 continuous improvement. Additionally, periodic conference calls will be schedule  
651 with each intervention site in order to explain about the quality measure and  
652 discuss which aspects needs improvement.

653

### 654 **3.9. Outcomes**

655

#### 656 **3.9.1. Primary Outcome of the First Phase**

- 657
- Proportion of prescription of evidence-based therapies (see Table 3).
- 658
- Barriers to implementation of methodologies.

659

### 660 **3.9.2. Secondary Outcomes of the First Phase**

- 661
- Disability (mRankin) in 90 days
- 662
- Mortality, in hospital and 90 days.
- 663
- Stroke recurrence in 90 days.

664

### 665 **3.9.3. Primary Outcome of the Second Phase**

- 666
- Composite Adherence Score: defined as the sum of usage of evidence-based
- 667 therapies in the first 48 hours and at discharge among the patients' total eligible
- 668 opportunities. For this purpose, patients with contraindications (which are
- 669 specific for each endpoint) were excluded from the denominators. Evidence
- 670 based therapies in the first 48 hours include: early antithrombotic, RT-PA within
- 671 therapeutic window, dysphagia screening, DVT Prophylaxis, Door to Needle
- 672 Time < 60 minutes, dysphagia screening). Discharge Therapies include:
- 673 antithrombotic, statins (LDL 100 or not documented), anticoagulants for atrial
- 674 fibrillation or flutter, assessment for rehabilitation and smoke cessation
- 675 education or education),

676

### 677 **3.9.4. Secondary Outcomes of the Second Phase**

- 678
- Proportion of prescription of evidence-based strategies in the first 48 hours and
- 679 at discharge ("All or None" Measures), including: early antithrombotic, RT-PA
- 680 within therapeutic window, DVT Prophylaxis, Door to Needle Time < 60
- 681 minutes, dysphagia screening, antithrombotic at discharge, statins (LDL 100 or
- 682 not documented), anticoagulants for atrial fibrillation or flutter, assessment for
- 683 rehabilitation and smoke cessation education or medication.

684

  - Additional Strategies Usage:

685

  - Global Rt-PA rate

686

  - Anti Hipertensive agents at discharge.

687

  - Door to needle time < 45 minutos

- 688       • Mortality at 90 days.
- 689       • Disability (mRankin) in 90 days.
- 690       • Stroke Recurrence in 90 days.

691

692       **3.10. Variables of Interest**

693

694       The following quality indicators will be assessed:

695

696

697

698

699

700       **Table 3 - Quality Indicators**

| Name of Variable  | Description                                                      | Inclusion                                                                                                                                                                           | Exclusion                                                           | Numerator                                                                                                                                                                                                                                |
|-------------------|------------------------------------------------------------------|-------------------------------------------------------------------------------------------------------------------------------------------------------------------------------------|---------------------------------------------------------------------|------------------------------------------------------------------------------------------------------------------------------------------------------------------------------------------------------------------------------------------|
| Global Rt-PA Rate | Rt-PA Usage                                                      | All stroke patients admitted within 24 hours of symptoms                                                                                                                            | Not applicable                                                      | Patients that receive Rt-PA                                                                                                                                                                                                              |
| <b>Rt-PA</b>      | Recombinant Plasminogen Activator used within therapeutic window | Eligible patients diagnosed with stroke who arrive at the hospital within 3.5 hours of symptom onset and who are treated within 4.5 hours of symptom onset.<br><br>*The subgroup of | Patients with medical contraindications or other documented reasons | Patients who received Rt-PA within 3.5 hours of symptom onset.<br><br>*The subgroup of patients who arrive at the hospital within 02 hours of symptom onset and who are treated within 03 hours of symptom onset will also be evaluated. |

|                                    |                                                                                                                  |                                                                   |                                                                                                                   |                                                                                                                                                                                                                                                                                      |
|------------------------------------|------------------------------------------------------------------------------------------------------------------|-------------------------------------------------------------------|-------------------------------------------------------------------------------------------------------------------|--------------------------------------------------------------------------------------------------------------------------------------------------------------------------------------------------------------------------------------------------------------------------------------|
|                                    |                                                                                                                  |                                                                   |                                                                                                                   | patients who arrive at the hospital within 02 hours of symptom onset and who are treated within 03 hours of symptom onset will also be evaluated.                                                                                                                                    |
| <b>Early Antithrombotic Agents</b> | Antithrombotic therapy prescribed within 48 hours of admission (includes antiplatelet agents or anticoagulants). | Eligible patients diagnosed with stroke or TIA                    | Patient with any documented medical contraindication as a reason for no treatment.                                | Patients treated with antithrombotic agents until the end of the 2nd day of admission (including ASA, ASA+dipyridamole, ticlopidine, clopidogrel, unfractionated heparin, low molecular weight heparin, and warfarin, but does not include SC heparin at prophylactic doses for DVT. |
| <b>Prophylaxis for DVT</b>         | Patients at risk for DVT (unable to walk) who received DVT prophylaxis until the end of the second day.          | Patients eligible for DVT prophylaxis with a diagnosis of stroke. | Patients who can walk at the end of the 2nd day. Excluding patients with any documented medical contraindication. | Patients treated with DVT prophylaxis until the end of the 2nd day of admission (including heparins, heparinoids, other anticoagulants or pneumatic compression devices.                                                                                                             |

|                                                                |                                                                                                                                                              |                                                                                                                                                                |                                                                                     |                                                                                                                                                                                 |
|----------------------------------------------------------------|--------------------------------------------------------------------------------------------------------------------------------------------------------------|----------------------------------------------------------------------------------------------------------------------------------------------------------------|-------------------------------------------------------------------------------------|---------------------------------------------------------------------------------------------------------------------------------------------------------------------------------|
| <b>Dysphagia Screening</b>                                     | Dysphagia Screening prior to any oral intake                                                                                                                 | Patients with a diagnosis of acute ischemic stroke                                                                                                             | Not Applicable                                                                      | Patients who are screened for dysphagia with validated tests before being given any food or fluids by mouth                                                                     |
| <b>Door-to-Needle Time &lt; 60 minutes</b>                     | Time since the patient's arrival to the hospital until the start of rt-PA infusion                                                                           | Patients eligible for treatment with rt-PA                                                                                                                     | Patients with documented medical contraindication.                                  | Patients treated with reperfusion therapy within 60 minutes of admission.                                                                                                       |
| <b>Door to needle &lt; 45 minutes</b>                          | Time since the patient's arrival to the hospital until the start of rt-PA infusion                                                                           | Patients eligible for treatment with rt-PA                                                                                                                     | Patients with documented medical contraindication.                                  | Patients treated with reperfusion therapy within 45 minutes of admission.                                                                                                       |
| <b>Oral Anticoagulation for Atrial Fibrillation or Flutter</b> | Anticoagulation prescribed at discharge for patients with documented atrial fibrillation or flutter during hospitalization                                   | Eligible patients with diagnosis of stroke and a history of paroxysmal or persistent atrial fibrillation or atrial flutter during this hospitalization period. | Patients with any documented medical contraindication as a reason for no treatment. | Patients who received anticoagulation at discharge (including therapeutic doses of heparin, heparinoids, warfarin, or other anticoagulants such as direct thrombin inhibitors). |
| <b>LDL = 100 or not documented</b>                             | Statins prescribed upon discharge if LDL $\geq$ 100 mg/dL, if the patient was previously treated with lipid-lowering medication before the admission, and if | Eligible patients with a diagnosis of stroke or TIA if LDL $\geq$ 100mg/dL, if the patient was previously treated with lipid-lowering                          | Patient with any documented medical contraindication as a reason for no treatment.  | Patients who received statins upon discharge (including statins, fibrates, niacin, binding resins, or selective cholesterol absorption inhibitors)                              |



LDL has not been documented. medication before the admission, and if LDL has not been documented.

|                                    |                                                                                              |                                                                                                                                                    |                                                                                    |                                                                                                                             |
|------------------------------------|----------------------------------------------------------------------------------------------|----------------------------------------------------------------------------------------------------------------------------------------------------|------------------------------------------------------------------------------------|-----------------------------------------------------------------------------------------------------------------------------|
| <b>Smoking Cessation</b>           | Intervention for smoking cessation (education or medication) prior to discharge for smokers. | Eligible patients with a diagnosis of stroke or TIA and smokers (defined as having initiated or maintained the habit of smoking in the last year). | Patient with any documented medical contraindication as a reason for no treatment. | Patients or their caregivers who received smoking cessation education or medication for smoking cessation before discharge. |
| <b>Anti hypertensives</b>          | Anti Hypertensives prescribed prior to discharge for patients with diagnoses Hypertension    | Eligible patients diagnosed with stroke and documented history of hypertension                                                                     | Patients with any documented contra indication for antihypertensive usage.         | Patients who receive anti hypertensive agents at discharge                                                                  |
| <b>Assessed for Rehabilitation</b> | Patients assessed by or treated by rehabilitation professional                               | All patients diagnosed with stroke                                                                                                                 | Not Applicable                                                                     | Patients who are assessed by or who receive rehabilitation services                                                         |

701 \*See attached the table containing the main contraindications to the above mentioned  
702 therapies.

- 703 • Stroke recurrence will be checked in the medical forms or by a brief telephone  
704 call from the data collector of each site (during phase 1), using an adaptation of  
705 the Stroke and TIA Verification Questionnaire (Appendix 1) (33). During phase  
706 2 this outcome will be assessed by the central office nurse.

- 707       • The degree of disability will be measured using the modified Rankin Scale  
708       (mRankin) (see Appendix 2). During phase 2 this assessment will be performed  
709       by the central office health care professional blinded to site allocation.
- 710       • Deaths will be classified as Cardiovascular, Non Cardiovascular, and Unknown.  
711       The cause of death is determined by the main condition that caused the death,  
712       not by the immediate mode of death. All causes of death will be deemed to be  
713       cardiovascular, unless there is a clearly defined non cardiovascular death, except  
714       for death without any additional information, which will be classified as  
715       Unknown cause. Cardiovascular death includes, but is not limited to,  
716       atherosclerotic coronary heart disease (acute myocardial infarction, sudden  
717       cardiac death, sudden death not associated with cardiac symptoms with gradual  
718       worsening, unwitnessed death without defined alternative cause, death related to  
719       cardiac surgery or coronary angiography), atherosclerotic vascular disease  
720       (cerebrovascular disease, including ischemic and hemorrhagic stroke, aortic,  
721       mesenteric, vascular, and renal disease, or peripheral artery disease, death  
722       related to non-coronary vascular procedure), and other cardiovascular diseases  
723       (pulmonary embolism, endocarditis, congestive heart failure, valve heart disease,  
724       arrhythmias). Example of non-cardiovascular death includes the primary cause  
725       of death as being infectious, related to malignancy, pulmonary, gastrointestinal,  
726       accidental, renal, and suicide.

727       Cardiovascular death will be classified as sudden, not sudden, and unwitnessed.

728       1) Sudden Cardiovascular Death: It is defined as unexpected and also classified as:

729           a. Witnessed: occurring within 60 minutes since symptom onset in the  
730           absence of another clearly non-cardiovascular cause **OR**

731           b. Unwitnessed: within 24 hours of having been seen alive in the absence of  
732           pre-existing conditions of circulatory failure or other cause of non-  
733           cardiovascular death.

734       All sudden deaths will be classified according to criteria (a) or (b).

735 2) Not Sudden Cardiovascular Death: This category is related to patients with  
736 cardiovascular symptoms with progressive worsening before death. It includes  
737 all patients with cardiovascular death who did not meet the criteria for sudden  
738 cardiac death or unwitnessed cardiovascular death.

739 3) Unwitnessed cardiovascular death: Unexpected death occurring when the patient  
740 has been seen in the previous 24 hours and with the absence of other identified  
741 major causes of death.

### 742 **3.11. Follow-up**

743

744 Data from patients included in the study referring to in-hospital stay will be  
745 collected from medical records. Data referring to 90 day follow up will be collected by  
746 the local data collectors during phase 1 from medical records (in case the patient is still  
747 in the hospital or has attended a medical meeting) or by phone call (in case there are no  
748 medical records available). In phase 2, data will be assessed by the Central Office health  
749 care professional, through a telephone interview.

750

### 751 **3.12. Endpoint Definition**

752

753 For the primary endpoint definition (adherence to all eligible evidence-based  
754 therapies in the first 48 hours and at discharge) we are using a Composite Adherence  
755 Score. This score is determined by the number of opportunities for receiving therapies  
756 (range, 0 to 10 for both acute and discharge medications) and number of therapies  
757 received (range, 0 to 10 for both acute and discharge medications) for each eligible  
758 patient. If a specific therapy was contraindicated, it was excluded from the opportunities  
759 to receive therapy (denominator). Each patient will have a composite percent rate of  
760 adherence calculated as:  $\text{received/opportunities} \times 100$ .

761 For the secondary endpoint definition we used the “All or None” approach.  
762 According to these criteria, to be classified as “yes”, a patient must have received all  
763 eligible therapies, otherwise the patient is classified as a “no answer in the database.

764 **3.13. Statistical Analysis Plan**

765

766 Quantitative variables will be described by mean and standard deviation  
767 whenever there is a normal distribution, or median and/or interquartile amplitude  
768 median and interquartile ranges in case of non-parametric distribution. Qualitative  
769 variables will be presented as absolute frequencies (number of patients) and relative  
770 frequencies (percentages).

771 Phase 1 (Registry)

772 This phase serves as baseline for the cluster randomized trial. Outcomes  
773 estimates from this phase will be used for a new sample size calculation and for  
774 defining the strata to be used in the randomization.

775 The main purpose of the phase 1 analysis is identifying the variability of the  
776 primary outcomes between clusters. Therefore, results will be presented as with the  
777 correspondent estimates of the standard deviation (or variance) within cluster and  
778 between clusters, This estimated will be generated by a mixed linear regression model  
779 with random effects between clusters. These estimates are enough to express the  
780 intracluster correlation coefficient (ICC) that will be used for the purpose of estimating  
781 the sample size. The ICC ( $\rho$ ) is defined as:

$$\rho = \frac{\sigma_a^2}{\sigma_a^2 + \sigma_e^2}$$

782

783 where  $\sigma_a^2$  refers to the random effect variance of the clusters (*clusters*) and  $\sigma_e^2$  to  
784 the variance of the measure. In practical manners we can assume the o ICC shows how  
785 much from the total variability is atributable to the clusters.

786 ICC estimates to each one of the outcomes' components will also be presented.  
787 Further details on ICC calculation and variations on the calculation for binary outcomes  
788 are described in Hayes e Moulton (2009)(34)

789

790 Phase 2 (Cluster Randomized Trial)

791 Results will be separated per group (intervention vs control). Results will be  
792 presented by groups (intervention vs. control) presenting first the clusters characteristics  
793 folowed by the patients characteristics.

794 Initially, will be demonstrated the adherence to the quality improvement  
795 intervention will be reported, as will be the time from training until intervention onset.  
796 Descriptive statistics on time from site activation until first patient inclusion will also be  
797 reported.

798 \_\_\_\_\_Inclusion Flowchart will be presented according to the CONSORT guidelines  
799 for cluster randomized trials.

800 All analysis will follow the intention to treat principle. Different interpretations  
801 for the intention to treat principle (regarding the analysis of missing data are used by  
802 different authors. To avoid misinterpretation, we define the intention to treat principle to  
803 be used in our analysis as follows:

804 1- The cluster allocated to the intervention group that don't follow or don't  
805 adhere to the intervention will be instructed to proceed with data collection  
806 irrespectively and will be evaluated within the group that was originally  
807 allocated. The same holds true for the control group, irrespective of possible  
808 contamination.

809 2- Although one site receives and uses the intervention, the inclusion and  
810 exclusion criteria will be applied to the patients. Thus, in case there are  
811 patients that might be initially included in the sample, but for some reason is  
812 found not eligible to the study, one will be excluded from the analysis.

813 3- Missing data from the primary composite outcome will be treated as  
814 negative endpoints (worst case scenario).

815 The second criteria justifiable by its own definition. For example, if a patient  
816 initially suspected as stroke or TIA is included in the study but later the diagnosis is not  
817 confirmed, means that this patient is not eligible to the study on the first hand, and is not  
818 eligible to any of the components of the primary outcome.

819 The third criterium is conservative, although the data regarding the components of  
820 the primary outcome are easily obtained and it is expected (if any) a minimal missing  
821 data rate (probably  $< 0.1\%$ ). Thus, there will not be data imputation

822 The primary outcome will be analyzed using a mixed effects linear regression model  
823 with random effects to account for the correlation of observations within clusters. This  
824 model will consider residuals assuming a normal distribution. We intend to perform a  
825 sensitivity analysis considering a mixed effect linear model that better suits the real  
826 distribution of the data (beta distribution models, binomial distribution using the sum of  
827 each component, for example) in case we don't observe a normal distribution.

828 The choice for the simple model (with possible failure on the assumptions) over a  
829 most complex one was made due to lack of background in the literature supporting  
830 other methods for better sample size estimation assuming the same type of outcome  
831 used in our study. However, we understand that this choice would estimate a more  
832 conservative (larger) sample size.

833 The components of the primary outcome will be individually evaluated using mixed  
834 effects general linear models considering binomial distribution (logistic regression with  
835 random effect at the intercept (cluster adjusted)).

836 All models will be adjusted for the cluster baseline value (obtained during phase 1)  
837 and for the group effect (intervention vs control).

838 Treatment effects will be expressed as absolute mean difference or the composite  
839 outcome and odds ratio with the respective 95% confidence intervals for the individual  
840 components.

841 As a sensitivity analysis we will perform: an adjusted analysis for hospital status  
842 (teaching vs non-teaching), and presence of a stroke unit; an analysis considering only  
843 the sample that was included following the proposed intervention protocol (*per protocol*  
844 *analysis*).

845 Pre-specified subgroup analysis, for which interaction by group (intervention vs  
846 control) will be assessed as follows: teaching hospital (or not), presence of a stroke unit,

847 presence of a neurologist in the emergency department, final diagnosis (AIS vs TIA),  
848 and country.

849 Disability will be assessed by the mRankin scale primarily in a dichotomous model  
850 (proportion of patients with mRankin < 2) and secondarily by a shift analysis.

851 Anticipated sub-analysis for subsequent sub-studies include: cross country analysis,  
852 stroke unit sub-population.

853 The analysis will be performed using R *software* in its most updated version. The  
854 level of statistical significance is set as two-sided 5%.

855

### 856 **3.14. Sample Size**

857

#### 858 Phase 1

859 Because of the reduced availability of resources compared to the centers  
860 evaluated in these studies, it is expected that the prescription of evidence-based  
861 interventions in the first 48 hours and at discharge is even lower in public hospitals  
862 (estimate of 40%). Thus, in Phase 1, the objective will be to include 40 stroke patients  
863 per participant hospital. This sample size is sufficient to detect all the expected  
864 percentages (between 1.0% and 95%, depending on the type of evidence-based  
865 intervention) for indicators of health care quality, considering an absolute sampling  
866 error of 10% and a significance level of 5%.

#### 867 Phase 2

868 Ideally, it is expected that after the implementation of a program to improve clinical  
869 practice, evidence-based interventions are prescribed to most patients (about 90%).  
870 However, programs of clinical practice improvement have moderate effect (absolute  
871 increase of 10%) on the prescription of treatments with proven benefit. There is no  
872 clear definition of the effect size expected for interventions of clinical practice  
873 improvement in the literature because of the wide heterogeneity in terms of the design

874 of the available evidence, statistical power and methodological quality. Additionally,  
875 the efficacy of different tools may vary according to the clinical setting.

876 Unlike individual patient randomization where it is expected each patient being  
877 independent from another, in cluster randomization patients treated in the same hospital  
878 are expected to be similarly treated. In such situations it is necessary to consider this  
879 dependence when estimating sample size. This is called intra-cluster correlation. As  
880 previously observed in studies evaluating patient care, the ICC is approximately 0.05.  
881 (31).

882 Thus, considering fixed sized clusters of approximately 50 patients, a 0.086 mean  
883 difference in the Composite Adherence Score, with 5% statistical significance we  
884 estimated the following scenarios differing according to standard deviation (SD), power  
885 and intraclass coefficient (ICC):

| Mean difference | Standard Deviation | ICC         | Power      | Sample (number of clusters per arm) | Total sample size (number of Patients) |
|-----------------|--------------------|-------------|------------|-------------------------------------|----------------------------------------|
| <b>0.086</b>    | <b>0.25</b>        | <b>0.05</b> | <b>90%</b> | <b>15</b>                           | <b>1500</b>                            |
| <b>0.086</b>    | <b>0.25</b>        | <b>0.10</b> | <b>80%</b> | <b>18</b>                           | <b>1800</b>                            |
| <b>0.086</b>    | <b>0.20</b>        | <b>0.10</b> | <b>90%</b> | <b>16</b>                           | <b>1600</b>                            |
| <b>0.086</b>    | <b>0.20</b>        | <b>0.15</b> | <b>80%</b> | <b>17</b>                           | <b>1700</b>                            |

886

887

### 888 Overall

889 Considering approximately 50 patients per cluster in phase 2 and between 30  
890 and 36 sites, it will be necessary to collect data from 1500 to 1800 patients.

891 Considering possible losses from phase 1 to phase 2 we will include up to 42  
892 sites during phase 1. Thus, it will be collected data from up to 1680 patients.

893 In case a high variability between hospitals is observed, or the pattern of  
894 prescription is much different from expected, a new sample size calculation will be  
895 performed for phase 2.

896



897 **3.15. Data Collection System**

898

899 The IEP-HCor Data Management System is a web-based system developed by a  
900 team of programmers at IEP-HCor to run on a Microsoft SQL platform<sup>®</sup>. The system  
901 has the following functions: patient registry, 24-hour randomization with allocation  
902 concealment, data input, data cleansing, and data export for statistical analysis.

903 Data are collected by means of electronic case report forms via the Internet using the  
904 IEP-HCor Data Management System. Data are entered into the system by the team of  
905 each center. All forms are electronically signed by the principal investigator in each  
906 center or by other appointed persons. Instructions for using the system will be made  
907 available to investigators.

908

909

910 **4. ETHICAL ASPECTS AND GOOD CLINICAL PRACTICES**

911

912 The BRIDGE-STROKE study will be conducted in accordance with the Brazilian and  
913 international standards described in the documents below:

914

- Declaration of Helsinki

915

- Brazilian Resolution 466/12 and related documents of the Ministry of Health

916

917 • ICH Harmonized Tripartite Guidelines for Good Clinical Practice,  
918 1996.

919

- Ottawa Statement for Design and Conduct of Cluster Randomized Trials(35)

920

921 • Local Applicable Regulatory requirements for sites in Argentina and  
922 Peru

923 **4.1. Study Approval**

924

925 Before starting the study, the investigator must forward a copy of the protocol, a  
926 copy of the informed consent form, and of other required documents to the Research  
927 Ethics Committee of the institution. The approval letter from the REC must be sent to  
928 the Coordinating Center. Any changes to the original protocol must also be approved by  
929 the REC of each center.

#### 930 **4.2. Informed Consent and Institutional Authorization Form**

931

932 The BRIDGE Stroke study is a cluster randomized trial evaluating clinical  
933 practice improvement. The particularities and ethical issues of this study design are  
934 contemplated in the Ottawa Statement(35).

935 Since the study interventions are not oriented to the patients but to the health  
936 care providers (the research team has no direct contact with the patient) there will not be  
937 any direct intervention oriented to the patient or procedure evaluation that is not  
938 established practice. Only data on acute stroke treatment will be collected from each  
939 institution. Thus, patients will not provide individual informed consent for this purpose.

940 The individual informed consent will be provided only for the purpose of 90 day  
941 follow up data collection, since this is the only moment where the research team  
942 establishes direct contact to the patient.

943 However, each responsible party (the clinical director, the emergency department  
944 coordinator or any other responsible authority) must consent with the center  
945 participation. Each institution will be asked to provide an authorization form. This  
946 authorization form must be properly evaluated and approved by local Ethical  
947 Committees. This form also guarantees data confidentiality regarding the identity of the  
948 patients as well as health care providers.

949

#### 950 **4.3. Study Approval**

951

952 Before initiating the study, the protocol and the consent form used in the  
953 research center, as well as other documents, must be submitted to and approved by the

954 Research Ethics Committee (REC) of Hospital do Coração according to local regulatory  
955 requirements. The investigator must submit brief written descriptions of the trial status  
956 to the REC annually, or more frequently, if requested by such institutions.

957

#### 958 **4.4. Study Registration**

959

960 The BRIDGE-STROKE study will be registered on the Platform Brazil, on the  
961 platform of the Brazilian Clinical Trials Registration (ReBEC), and on  
962 ClinicalTrials.gov.

#### 963 **4.5. Data Confidentiality**

964

965 No patient data will be disclosed. The data capture system will use numbers to  
966 identify the patients and centers. The data on printed medical records will be kept as  
967 confidential by all participating centers, being stored in locked cabinets. The  
968 confidentiality of patients will be preserved in all reports and at any time of the study.

#### 969 **4.6. Reports**

970

971 The investigator must submit reports on the evolution of the study to the REC of the  
972 institution every six months and a final report upon completion of the study.

### 973 **5. STUDY COORDINATION**

#### 974 **5.1. Coordinating Center**

975

976 The Coordinating Center of the BRIDGE-STROKE study will be the Research  
977 Institute at Hospital do Coração (IP-HCor). The institution is widely experienced in  
978 conducting large randomized clinical trials. The qualified teams will provide the  
979 participating centers with guidance and support to ensure adherence to the study  
980 protocol. The teams have the necessary experience and level of expertise in research  
981 methods and biostatistics, in addition to being aided by awarded researchers.

982            Considering patients with cardiovascular diseases, the studies coordinated by the  
983 IEP-HCor over the last 5 years recruited more than 25 000 patients.

984            **Equipe de trabalho no centro coordenador:**

- 985            ● Otávio Berwanger – Senior Investigator – Co-Chair – Steering Committee
- 986            ● Maria Julia Machline Carrion – Principal Investigator, Co-Chair – Steering  
987            Committee.
- 988            ● Alexandre Biasi Cavalcanti – Senior Trialist – Clinical Trials Unit Manager
- 989            ● Eliana Vieira Santucci – Data Manager
- 990            ● Helio Penna Guimarães – Senior Trialist
- 991
- 992            ● Karina Normilio – Site Manager.
- 993            ● Juliana Yamashita – Regulatory Affairs.
- 994            ● Ligia Nasi Laranjeira – Site Manager (Coordinator)
- 995            ● Lucas Petri Damiani – Statistician.
- 996            ● Nanci Valeis – Regulatory Affairs (Coordinator)
- 997            ● Pedro Gabriel Melo de Barros e Silva – Trialist (CEC)
- 998            ● Rafael Marques Soares – Site Manager Especialista em Gerenciamento de  
999            Centros. Instituto de Pesquisa HCor.
- 1000            ● Renato Hideo – Statistician.
- 1001            ● Viviane Bezerra Campos – Data Manager.
- 1002
- 1003

1004            **5.2. Steering Committee**

1005

1006            The members of the BRIDGE-STROKE Steering Committee will be responsible  
1007 for overseeing the clinical trial, including decisions to discontinue or modify the study  
1008 procedures, if necessary, deal with the challenges involved in implementing the  
1009 protocol, review and interpret the data, and prepare the final manuscript. This  
1010 Committee is directed by two co-chairs. Such coordinating work will be conducted in  
1011 person or through meetings over the phone held at least quarterly. All other  
1012 commissions of the BRIDGE-STROKE study will report directly to the Committee.

1013

1014            **5.3. Executive Committee**

1015

1016 This Committee is composed by members of the Steering Committee that  
1017 operate at the Coordinating Center. This Committee acts as an administrative and  
1018 executive arm of the Steering Committee, being responsible for operational  
1019 decisions on behalf of the Steering Committee.

#### 1020 **5.4. Publication Committee** 1021

1022 Members of the Executive Committee will be selected to join a Publication  
1023 Committee that will be responsible for writing the final manuscript and submit it for  
1024 publication. This committee will also manage the database and will be responsible for  
1025 assessing publication proposals based on data from the BRIDGE-STROKE study.

#### 1026 **5.5. Adjudication Process** 1027

1028 The Clinical Events Committee (CEC) is responsible for assessing all patients  
1029 included in the study in order to adjudicate the stroke diagnosis. All potential events  
1030 will be entered into the tracking database of the CEC. Next, there will be an  
1031 administrative review of each outcome to see if all required documents are available.  
1032 For the adjudication process, we will consider the following original documents: official  
1033 medical reports about the event, tests signed by physicians, and other tests considered  
1034 relevant to the related outcome. Electronic records or DVD on imaging studies will not  
1035 be required, but may be requested if the official reports are not available or in case of  
1036 disagreement between adjudicators or between clinical presentation and test results.

1037 The IEP-HCor will print the necessary documents of the eCRF and include  
1038 additional supporting information in a CEC package. The HCor will forward two copies  
1039 of each package of outcomes to the CEC, where the packages will be randomly assigned  
1040 to two independent medical reviewers. The reviewers will independently review the  
1041 cases assigned to them, document and provide supporting information for analysis of  
1042 each case directly in the outcome package. If both adjudicators agree, the adjudications  
1043 of the event will be considered complete. If there is disagreement between the medical  
1044 reviewers, or at the discretion of a reviewer, the case will be submitted for review by at  
1045 least one additional reviewer to establish the final adjudication. The result of the final

1046 adjudication will be entered into the database by the coordinator of CEC. A copy of all  
1047 signed adjudications will be presented in each respective folder and stored in the CEC.  
1048 Additional details of specific processes for each one of the two branches of the CEC  
1049 will be detailed in the documentation maintained separately from standard procedures in  
1050 HCor.

1051 All adjudications must be documented in the review package of the event with  
1052 regard to the endpoint criteria. In any case that defines the precedence, the chair of the  
1053 CEC will document the details of the adjudication, and the case will be registered in a  
1054 log that will serve as a guide for reviewers as to ensure consistency in relation to the use  
1055 of endpoint definitions.

1056

## 1057 **5.6. Data Quality Management**

1058

1059 The procedures to ensure data quality include:

- 1060 1) All investigators will attend a training session before the start of the study to  
1061 standardize procedures, including data collection;
- 1062 2) The investigators will be able to contact the Study Coordinating Center to solve  
1063 issues or problems that may arise;
- 1064 3) Data entry into the IEP-HCor Data Management System is subject to various  
1065 checks for missing data, plausible, possible or non-permitted value ranges, and  
1066 logic checks. Problems are informed by the system at the time of data entry;
- 1067 4) Statistical techniques to identify inconsistencies will be applied periodically  
1068 (about every two weeks). The centers will be notified of the inconsistencies and  
1069 asked to correct them;
- 1070 5) Statistical routines to identify fraud will be conducted periodically (every 90  
1071 days);
- 1072 6) All centers will be monitored throughout the study;
- 1073 7) The Coordinating Center will conduct a monthly review of detailed reports on  
1074 screening, inclusion, follow-up, and data consistency and completeness. The  
1075 Coordinating Center will take immediate action to solve any problems.

1076

1077 **5.7. Responsibilities of the Study Sponsor**  
1078

1079 This is a relevant clinical trial, designed and sponsored by the IEP-HCor. The  
1080 objective is solely to obtain the best scientific knowledge in daily clinical practice, free  
1081 from any conflict of interest. If necessary, the source of financial support will be  
1082 acknowledged in presentations and publications. The results of the BRIDGE-STROKE  
1083 study will be published regardless of the positive or negative nature of the data.  
1084

1085 **5.8. Responsibilities of Investigators and Sub-investigators at Participating**  
1086 **Centers.**  
1087

1088 The principal investigator of each center will conduct and/or oversee the daily  
1089 operations of the study in his/her respective center, assisted by the sub-investigator and  
1090 the research coordinators. Most tasks can be assigned by the principal investigator to  
1091 team members of each research center, provided that these individuals are qualified for  
1092 the tasks and appropriately listed in the form of task assignment. However, the principal  
1093 investigator will continue to be legally responsible for the tasks. In addition, the  
1094 investigators are responsible for initiating the study at its center, maintaining the study  
1095 procedures, ensuring improvements in the protocol, and also ensuring data quality and  
1096 accuracy.

1097  
1098

1099 **5.9. Monitoring**  
1100

1101 Representatives of the Project Office of the BRIDGE-STROKE must be allowed  
1102 to visit all the participating centers periodically to evaluate data, quality, and integrity of  
1103 the study. At the center, they will review the records of the study and compare them  
1104 directly with the source documents, and discuss the conduct of the study with the  
1105 investigator, and check if the facilities remain acceptable.

1106 Additionally, to monitor possible selection bias, all sites are asked to complete a  
1107 screening log in a weekly basis, Recruitment evolution during phase 2 in each site will

1108 be weekly controlled and compared to the performance observed in phase 1. In case  
1109 sites don't perform as in phase 1 or in case they don't provide an appropriate and  
1110 systematic screening log, they will be asked to review all admission of possible ischemic  
1111 strokes and TIAs during the same period.

1112

1113

#### 1114 **5.10. Publication of Results**

1115 The success of the BRIDGE-STROKE study will depend on the teams involved,  
1116 on the efforts and collaboration of all investigators, research coordinators, and patients.  
1117 Therefore, the main results will be published, and the authors will be the Steering  
1118 Committee on behalf of the BRIDGE Stroke Investigators who will be cited at the end  
1119 of the manuscript. Will be considered up to three members from each site (according to  
1120 the principal investigators' criteria). Other inclusions will be evaluated by the  
1121 Publication Committee.

1122

1123

#### 1124 **6. AMENDMENTS TO THE PROTOCOL**

1125 Any protocol alterations will be registered in writing by an amendment signed by  
1126 the Principal Investigator.

1127 Approval and recommendation of changes provided by the REC is required before  
1128 its implementation, unless there are safety reasons that override approval or  
1129 recommendation.

1130

1131

1132

1133

1134

1135



1136

1137

1138

1139

1140

## 1141 **7. REFERENCES**

1142

1143

1144 1. Heo JH. The Effects of Very Early Use of Rosuvastatin in Preventing Recurrence of  
1145 Ischemic Stroke (EUREKA) 2010 [updated July 20, 2011].

1146 2. Saposnik G, Del Brutto OH, Iberoamerican Society of Cerebrovascular D. Stroke in  
1147 South America: a systematic review of incidence, prevalence, and stroke subtypes. Stroke.  
1148 2003;34(9):2103-7.

1149 3. Sposato LA, Coppola ML, Altamirano J, Borrego Guerrero B, Casanova J, De Martino M,  
1150 et al. Program for the epidemiological evaluation of stroke in Tandil, Argentina (PREVISTA)  
1151 study: rationale and design. International journal of stroke : official journal of the International  
1152 Stroke Society. 2013;8(7):591-7.

1153 4. DATASUS - Taxa de Mortalidade Específica para doenças cerebrovasculares [Internet].  
1154 1990 [cited January 30th 2014]. Available from:  
1155 <http://tabnet.datasus.gov.br/cgi/tabcgi.exe?idb2012/c08.def>.

1156 5. DATASUS - Taxa de Mortalidade Específica para doenças cerebrovasculares [Internet].  
1157 2011 [cited January 30th 2014]. Available from:  
1158 <http://tabnet.datasus.gov.br/cgi/tabcgi.exe?idb2012/c08.def>.

1159 6. Kim AS, Johnston SC. Global variation in the relative burden of stroke and ischemic  
1160 heart disease. Circulation. 2011;124(3):314-23.

1161 7. de Carvalho JJ, Alves MB, Viana GA, Machado CB, dos Santos BF, Kanamura AH, et al.  
1162 Stroke epidemiology, patterns of management, and outcomes in Fortaleza, Brazil: a hospital-  
1163 based multicenter prospective study. Stroke. 2011;42(12):3341-6.

1164 8. de Carvalho FA, Schwamm LH, Kuster GW, Bueno Alves M, Cendoroglo Neto M,  
1165 Sampaio Silva G. Get with the guidelines stroke performance indicators in a Brazilian tertiary  
1166 hospital. Cerebrovascular diseases extra. 2012;2(1):26-35.

1167 9. Conforto AB, Paulo RB, Patroclo CB, Pereira SL, Miyahara Hde S, Fonseca CB, et al.  
1168 Stroke management in a university hospital in the largest South American city. Arquivos de  
1169 neuro-psiquiatria. 2008;66(2B):308-11.

1170 10. Moro CH, Goncalves AR, Longo AL, Fonseca PG, Harger R, Gomes DB, et al. Trends of  
1171 the Incidence of Ischemic Stroke Thrombolysis over Seven Years and One-Year Outcome: A  
1172 Population-Based Study in Joinville, Brazil. Cerebrovascular diseases extra. 2013;3(1):156-66.

1173 11. Sposato LA, Esnaola MM, Zamora R, Zurru MC, Fustinoni O, Saposnik G, et al. Quality of  
1174 ischemic stroke care in emerging countries: the Argentinian National Stroke Registry  
1175 (ReNACer). Stroke. 2008;39(11):3036-41.

1176 12. Reeves MJ, Arora S, Broderick JP, Frankel M, Heinrich JP, Hickenbottom S, et al. Acute  
1177 stroke care in the US: results from 4 pilot prototypes of the Paul Coverdell National Acute  
1178 Stroke Registry. Stroke. 2005;36(6):1232-40.

- 1179 13. LaBresh KA, Reeves MJ, Frankel MR, Albright D, Schwamm LH. Hospital treatment of  
1180 patients with ischemic stroke or transient ischemic attack using the "Get With The Guidelines"  
1181 program. Archives of internal medicine. 2008;168(4):411-7.
- 1182 14. Schwamm LH, Fonarow GC, Reeves MJ, Pan W, Frankel MR, Smith EE, et al. Get With  
1183 the Guidelines-Stroke is associated with sustained improvement in care for patients  
1184 hospitalized with acute stroke or transient ischemic attack. Circulation. 2009;119(1):107-15.
- 1185 15. Fonarow GC, Reeves MJ, Smith EE, Saver JL, Zhao X, Olson DW, et al. Characteristics,  
1186 performance measures, and in-hospital outcomes of the first one million stroke and transient  
1187 ischemic attack admissions in get with the guidelines-stroke. Circulation Cardiovascular quality  
1188 and outcomes. 2010;3(3):291-302.
- 1189 16. Comission TJ. Specifications Manual for National Hospital Inpatient Quality Measures.  
1190 2014.
- 1191 17. Jauch EC, Saver JL, Adams HP, Jr., Bruno A, Connors JJ, Demaerschalk BM, et al.  
1192 Guidelines for the early management of patients with acute ischemic stroke: a guideline for  
1193 healthcare professionals from the American Heart Association/American Stroke Association.  
1194 Stroke. 2013;44(3):870-947.
- 1195 18. Reeves MJ, Grau-Sepulveda MV, Fonarow GC, Olson DM, Smith EE, Schwamm LH. Are  
1196 quality improvements in the get with the guidelines: stroke program related to better care or  
1197 better data documentation? Circulation Cardiovascular quality and outcomes. 2011;4(5):503-  
1198 11.
- 1199 19. Hughes S. Few Receive Best Acute Stroke Care Despite Good Access. Medscape  
1200 [Internet]. 2014 February 25th, 2014.
- 1201 20. Rede Brasil AVC 2014 [Available from:  
1202 [http://redebrasilavc.org.br/default.php?p\\_secao=15&PHPSESSID=e9bf09582f579534ceed0895](http://redebrasilavc.org.br/default.php?p_secao=15&PHPSESSID=e9bf09582f579534ceed089595714ccc)  
1203 [95714ccc](http://redebrasilavc.org.br/default.php?p_secao=15&PHPSESSID=e9bf09582f579534ceed089595714ccc).
- 1204 21. Saúde Md. Projeto Nacional de Atendimento ao Acidente Vascular. In: SECRETARIA DE  
1205 ATENÇÃO À SAÚDE DDAE, COORDENAÇÃO GERAL DE URGÊNCIA E EMERGÊNCIA, editor.  
1206 Brasil2010.
- 1207 22. Pennington L, Roddam H, Burton C, Russell I, Godfrey C, Russell D. Promoting research  
1208 use in speech and language therapy: a cluster randomized controlled trial to compare the  
1209 clinical effectiveness and costs of two training strategies. Clinical rehabilitation.  
1210 2005;19(4):387-97.
- 1211 23. Jones A, Tilling K, Wilson-Barnett J, Newham DJ, Wolfe CD. Effect of recommended  
1212 positioning on stroke outcome at six months: a randomized controlled trial. Clinical  
1213 rehabilitation. 2005;19(2):138-45.
- 1214 24. Strasser DC, Falconer JA, Stevens AB, Uomoto JM, Herrin J, Bowen SE, et al. Team  
1215 training and stroke rehabilitation outcomes: a cluster randomized trial. Archives of physical  
1216 medicine and rehabilitation. 2008;89(1):10-5.
- 1217 25. Weir CJ, Lees KR, MacWalter RS, Muir KW, Wallesch CW, McLelland EV, et al. Cluster-  
1218 randomized, controlled trial of computer-based decision support for selecting long-term anti-  
1219 thrombotic therapy after acute ischaemic stroke. QJM : monthly journal of the Association of  
1220 Physicians. 2003;96(2):143-53.
- 1221 26. Dirks M, Niessen LW, van Wijngaarden JD, Koudstaal PJ, Franke CL, van Oostenbrugge  
1222 RJ, et al. Promoting thrombolysis in acute ischemic stroke. Stroke. 2011;42(5):1325-30.
- 1223 27. Johnston SC, Sidney S, Hills NK, Grosvenor D, Klingman JG, Bernstein A, et al.  
1224 Standardized discharge orders after stroke: results of the quality improvement in stroke  
1225 prevention (QUISP) cluster randomized trial. Annals of neurology. 2010;67(5):579-89.

- 1226 28. De Luca A, Toni D, Lauria L, Sacchetti ML, Giorgi Rossi P, Ferri M, et al. An emergency  
1227 clinical pathway for stroke patients--results of a cluster randomised trial (isrctn41456865).  
1228 BMC health services research. 2009;9:14.
- 1229 29. Middleton S, McElduff P, Ward J, Grimshaw JM, Dale S, D'Este C, et al. Implementation  
1230 of evidence-based treatment protocols to manage fever, hyperglycaemia, and swallowing  
1231 dysfunction in acute stroke (QASC): a cluster randomised controlled trial. Lancet.  
1232 2011;378(9804):1699-706.
- 1233 30. Swartz RH, Sicard MN, Silver FL, Saposnik G, Gladstone DJ, Breaton J, et al. The CLOQS  
1234 trial protocol: a cluster-randomized trial evaluating a simple, low-cost intervention to reduce  
1235 treatment times in acute stroke. International journal of stroke : official journal of the  
1236 International Stroke Society. 2013.
- 1237 31. Sutton CJ, Watkins CL, Dey P. Illustrating problems faced by stroke researchers: a  
1238 review of cluster-randomized controlled trials. International journal of stroke : official journal  
1239 of the International Stroke Society. 2013;8(7):566-74.
- 1240 32. Berwanger O, Guimaraes HP, Laranjeira LN, Cavalcanti AB, Kodama AA, Zazula AD, et  
1241 al. Effect of a multifaceted intervention on use of evidence-based therapies in patients with  
1242 acute coronary syndromes in Brazil: the BRIDGE-ACS randomized trial. JAMA : the journal of  
1243 the American Medical Association. 2012;307(19):2041-9.
- 1244 33. Jones WJ, Williams LS, Meschia JF. Validating the Questionnaire for Verifying Stroke-  
1245 Free Status (QVSFS) by neurological history and examination. Stroke. 2001;32(10):2232-6.
- 1246 34. Hayes RjM, L.H. Variability between clusters. In: Hayes RLM, L.H., editor. Cluster  
1247 randomised trials. Boca Raton, Florida: Chaoman & Hall; 2009. p. 17-8.
- 1248 35. Taljaard M, Weijer C, Grimshaw JM, Eccles MP, Ottawa Ethics of Cluster Randomised  
1249 Trials Consensus G. The Ottawa Statement on the ethical design and conduct of cluster  
1250 randomised trials: precis for researchers and research ethics committees. BMJ.  
1251 2013;346:f2838.
- 1252

1253 **Protocol Amendments Description**

| <b>Protocol Version</b> | <b>Description and Reason for Change</b>                                                                                                                                                                                                                                                                                                                                                                                                                                                                                                                                                                                                                                                                                                                                                                                                                                                                                                                                                                                | <b>Date</b>    |
|-------------------------|-------------------------------------------------------------------------------------------------------------------------------------------------------------------------------------------------------------------------------------------------------------------------------------------------------------------------------------------------------------------------------------------------------------------------------------------------------------------------------------------------------------------------------------------------------------------------------------------------------------------------------------------------------------------------------------------------------------------------------------------------------------------------------------------------------------------------------------------------------------------------------------------------------------------------------------------------------------------------------------------------------------------------|----------------|
| 2.2                     | First Approved Version                                                                                                                                                                                                                                                                                                                                                                                                                                                                                                                                                                                                                                                                                                                                                                                                                                                                                                                                                                                                  | June 2014      |
| 2.3                     | 1) Cluster retention criteria for phase 2 is better explained.<br>2) Better description of data collection procedures.<br>3) 90 days follow up visit is included.                                                                                                                                                                                                                                                                                                                                                                                                                                                                                                                                                                                                                                                                                                                                                                                                                                                       | September 2014 |
| 2.6                     | 1) Four different sample size scenarios were presented (ranging from 1500 to 1800 patients. This was made because we anticipated that not all sites included in the pre-randomization phase would be able to participate in the trial, so as a precaution we decided to have an idea of different scenarios that could answer the research question. Nevertheless, a new sample size calculation after phase 1 was anticipated since the first protocol version.<br>2) Generalized Estimation Equation was presented as the main analytical method, in order to better account for the cluster effect.<br>3) Primary and Secondary Objectives are better explained.<br>4) Clarification on the eligibility criteria for patients. Eligible patients are eligible if they present to the emergency department within 24 hours from symptoms onset.<br>5) Stratification in tertiles is added.<br>6) Better description on the variables of interest.<br>7) Clusters' size including approximately a mean of 40 patients. | May 2015       |
| 3.0                     | 1) A more detailed description of the statistical analysis plan is added to the protocol into serve as the basis for the first version of the SAP as a separate document.<br>2) Description of how the intention to treat principle will be applied in the trial. This is especially important for the handling of missing data considerations (also added in this version).<br>3) The linear regression mixed effect model was preferred as the main statistical method.<br>4) Assumptions on the distribution and possible adjustments in the analysis considering a non-normal distribution are also stated.                                                                                                                                                                                                                                                                                                                                                                                                         | December 2017  |

1254

1255

1256

1257

1258

1259 **Statistical Analysis Plan (SAP)** for the Brazilian intervention to  
1260 Increase evidence usaGe in practicE – Stroke (BRIDGE Stroke) -  
1261 A Cluster randomized trial to evaluate the increase in usage of  
1262 evidence-based practices using a multifaceted strategy

1263

1264 Trial Registration: NCT02223273

1265 Protocol Version 3.0 – November, 2017.

1266

1267

1268

1269 Written by:

1270

Maria Julia Machline Carrion, Principal Investigator, Research Institute HCor

1271

Eliana Vieira Santucci, Data Manager, Research Institute HCor

1272

1273

Lucas Petri Damiani, Senior Statistician, Research Institute HCor

1274

1275

1276

1277

1278

1279



1280

1281

Maria Julia Machline Carrion  
Chief Investigator



Lucas Petri Damiani  
Senior Statistician

1282

1283

1284

1285

|      |               |                                                          |    |
|------|---------------|----------------------------------------------------------|----|
| 1286 | <b>SUMARY</b> |                                                          |    |
| 1287 | 1)            | Administrative information .....                         | 55 |
| 1288 | 2)            | Background and rationale .....                           | 56 |
| 1289 | 3)            | Objectives .....                                         | 57 |
| 1290 | a)            | Objectives of the first phase .....                      | 57 |
| 1291 | b)            | Objectives of the second phase .....                     | 57 |
| 1292 | 4)            | Study methods .....                                      | 58 |
| 1293 | a)            | Trial design .....                                       | 58 |
| 1294 | b)            | Method of randomization and concealment allocation ..... | 58 |
| 1295 | c)            | Eligibility criteria .....                               | 58 |
| 1296 | d)            | Withdrawal .....                                         | 59 |
| 1297 | e)            | Sample size .....                                        | 60 |
| 1298 | f)            | Framework – Hypothesis .....                             | 63 |
| 1299 | g)            | Interim analysis and stopping guidance .....             | 63 |
| 1300 | h)            | Timing of final analysis .....                           | 63 |
| 1301 | i)            | Timing of outcomes assessment .....                      | 63 |
| 1302 | 5)            | Statistical principles .....                             | 63 |
| 1303 | a)            | Confidence intervals and P values .....                  | 64 |
| 1304 | b)            | Adherence and protocol deviations .....                  | 64 |
| 1305 | 6)            | Analysis .....                                           | 65 |
| 1306 | a)            | Baseline characteristics .....                           | 65 |
| 1307 | b)            | Outcomes .....                                           | 67 |
| 1308 | c)            | Analysis methods .....                                   | 72 |
| 1309 | d)            | Additional analysis .....                                | 75 |
| 1310 | e)            | Statistical software .....                               | 75 |
| 1311 |               | REFERENCES .....                                         | 76 |
| 1312 |               |                                                          |    |
| 1313 |               |                                                          |    |

1314 **1) Administrative information**

1315

1316 **Statistical Analysis Plan (SAP)** for the Brazilian intervention to Increase evidence usage in  
1317 practice – Stroke (BRIDGE Stroke) - A Cluster randomized trial to evaluate the increase in  
1318 usage of evidence-based practices using a multifaceted strategy

1319 a) ClinicalTrials.org Registration: NCT02223273

1320 b) Protocol Version 3.0 – November, 2017.

1321 c) SAP Revision

1322

| Protocol Version | SAP version     | Description and Reason for Change                                                                                                                                                                                                                                                                                                                                                                                                                                                                                                                                                                      | Date           |
|------------------|-----------------|--------------------------------------------------------------------------------------------------------------------------------------------------------------------------------------------------------------------------------------------------------------------------------------------------------------------------------------------------------------------------------------------------------------------------------------------------------------------------------------------------------------------------------------------------------------------------------------------------------|----------------|
| 2.2              | Not Applicable* | Not Applicable                                                                                                                                                                                                                                                                                                                                                                                                                                                                                                                                                                                         | June 2014      |
| 2.3              | Not Applicable* | No Changes made                                                                                                                                                                                                                                                                                                                                                                                                                                                                                                                                                                                        | September 2014 |
| 2.6              | Not Applicable* | 8) Four different sample size scenarios were presented (ranging from 1500 to 1800 patients. This was made because we anticipated that not all sites included in the pre-randomization phase would be able to participate in the trial, so as a precaution we decided to have an idea of different scenarios that could answer the research question. Nevertheless, a new sample size calculation after phase 1 was anticipated since the first protocol version.<br>9) Generalized Estimation Equation was presented as the main analytical method, in order to better account for the cluster effect. | May 2015       |
| 3.0              | 1.0             | 1) A more detailed description is added to the protocol in order to serve as the basis for the first version of the SAP as a separate document.<br>2) Description of how the intention to treat principle will be applied in the trial. This is especially important for the handling of missing data considerations (also added in this version).<br>3) The linear regression mixed effect model was preferred as the main statistical method.<br>4) Assumptions on the distribution and possible adjustments in the analysis considering a non-normal distribution are also stated.                  | December 2017  |

1323 \*The first version of the SAP as a separate document is the present version (1.0) based on the  
1324 Protocol version 3.0. Previously, the statistical considerations were exclusively summarized in  
1325 the Protocol body. Therefore, between version 2.2 and 2,6, no changes were made in the  
1326 Protocol.

1327

1328

1329

1330

1331

1332

1333

1334

1335

1336 **2) Background and rationale**

1337

1338 The full rationale for undertaken the trial is explained in detail in the Protocol.  
1339 Briefly, stroke is the second cause of death worldwide and a major public health issue  
1340 especially in middle, low middle and low-income countries (that is the case for Latin  
1341 America Countries). Despite the widespread availability of best practices guidelines as  
1342 well as quality indicators. However, the adherence to evidence-based therapies remains  
1343 suboptimal.

1344 Most studies evaluating quality improvement strategies were "before and after"  
1345 studies. Although interesting considering the logistics and low cost, this type of design  
1346 is unable to provide a definitive answer as to the effectiveness and efficiency of  
1347 interventions. This is because some patients' characteristics that are not considered in  
1348 the analyses may change the results (confounding variables), or may even be  
1349 responsible for improving the outcomes of interest, thus causing confounding bias.

1350 The only method capable of controlling known and unknown factors that may  
1351 have an influence on the outcomes is central randomization with allocation  
1352 concealment.

1353 The randomization of patients conducted in traditional clinical trials is not  
1354 effective to test educational interventions aimed at changing behaviors or clinical  
1355 practices. There might be inter-group contamination, i.e., patients allocated to the  
1356 control group may also receive the intervention under study. Therefore, there is an  
1357 increase in random type II error because inter-group contamination tends to dilute the  
1358 effect of the intervention.

1359 As mentioned before, "before and after" studies have the limitation of being long  
1360 and not providing conclusive answers about the comparison between the new  
1361 intervention and the well-established interventions. Thus, cluster studies are certainly  
1362 interesting, but provide greater methodological difficulty. In addition to assessing  
1363 isolated interventions, the cluster studies on stroke performed to date have



1364 methodological limitations that can certainly influence their limited results<sup>(31)</sup>.  
1365 Therefore, there is need for a study using appropriate methodology and robust  
1366 intervention strategy.

### 1367 3) Objectives

1368

#### 1369 7.1.Objectives of the first phase

- 1370 • To assess the prescription pattern of evidence-based interventions  
1371 (Aspirin/Antithrombotics, Rt-PA, Door-to-Needle Time < 60 min,  
1372 prophylaxis for DVT, dysphagia screening) in acute treatment and at hospital  
1373 discharge (anticoagulants in patients with atrial fibrillation or flutter,  
1374 antithrombotic agents, statins for patients with LDL  $\geq$  100 or not  
1375 documented, assessment for rehabilitation and smoke cessation education).
- 1376 • To detect the main barriers to the acceptance of interventions.
- 1377 • To prepare a registry of the patients with stroke seen in Brazilian hospitals to  
1378 assess data related to demographic characteristics, morbidity, mortality, and  
1379 standard practice in the treatment of stroke.

1380

#### 1381 7.2.Objectives of the second phase

##### 1382 7.2.1. Primary objective

1383 To assess whether a multifaceted strategy to improve clinical practice is  
1384 more effective than usual treatment regarding the prescription of evidence-  
1385 based therapies in the first 48 hours and at discharge (Early  
1386 Antithrombotics, Rt-PA, Door-to-Needle Time < 60 min, prophylaxis for  
1387 DVT, dysphagia screening, antithrombotics at discharge, statins for  
1388 patients with LDL  $\geq$  100 or not documented, anticoagulants for atrial  
1389 fibrillation or flutter, assessment for rehabilitation, patient education or  
1390 medication for smoke cessation.

##### 1391 7.2.2. Secondary objectives

- 1392 • To assess whether a multifaceted strategy to improve clinical practice is  
1393 more effective than usual treatment regarding **individually** the prescription

1394 of evidence-based therapies in the first 48 hours and at discharge and in an  
1395 “All or None” model; that is:

$$W_i = \begin{cases} 1, & \text{if } \sum_{j=1}^{10} y_{ij} = \sum_{j=1}^{10} x_{ij} \\ 0, & \text{otherwise} \end{cases}$$

- 1396
- 1397
- 1398
- 1399
- 1400
- To assess whether a multifaceted intervention to improve clinical practice is more effective than usual care for adherence to additional therapies such as door to needle time < 45 minutes and antihypertensive usage.
  - To assess whether a multifaceted intervention is more effective than usual care to decrease mortality, stroke recurrence and disability.

#### 1401 **4) Study methods**

1402

##### 1403 **a) Trial design**

1404 Cluster randomized trial aimed at testing the effectiveness of a program to  
1405 improve clinical practice at these hospitals.

##### 1406 **b) Method of randomization and concealment allocation**

1407 The hospitals will be stratified in tertiles according to the performance verified  
1408 during the observational phase (Phase 1). Once the hospital is allocated to one of the  
1409 groups all patients seen at that hospital will be treated following the same procedure.

1410 The list of hospital randomization will be generated considering a random  
1411 function with equal probability of allocation to one of the groups. Each center will be  
1412 numbered and only the numbers will be used for randomization, which will be  
1413 performed by a statistician of the HCor, thus ensuring allocation concealment. The  
1414 study coordinator will inform the center which measures should be taken without  
1415 informing the statistician about the hospitals that will receive evidence-based training.

##### 1416 **c) Eligibility criteria**

1417

1418 i) Eligibility criteria for participating hospitals

1419

1420 The hospitals eligible for the BRIDGE-Stroke study consists of public and private  
1421 hospitals offering 24/7 emergency care, with at least one routine physician in the unit  
1422 for 24 hours and one on-call neurologist. These hospitals should have availability of a  
1423 CNS imaging (cranial computed tomography/ MRI). They should also have alteplase  
1424 for performing intravenous reperfusion therapy. These hospitals completed the  
1425 screening form for appropriate initial assessment of basic conditions for inclusion and  
1426 adherence to the project.

1427 ii) Eligibility criteria for participants

1428 Patients diagnosed with ischemic stroke (including transient ischemic attack and  
1429 ischemic stroke with hemorrhagic transformation) with symptoms lasting up to 24  
1430 hours. We will exclude patients with signs of hemorrhagic stroke, expansive lesions and  
1431 central nervous system infections. Definitions are discriminated in the Protocol.

1432 **d) Withdrawal**

1433

1434 i) Criteria for cluster maintenance

1435

1436 By the end of Phase 1 all included hospitals will be evaluated in relation to data  
1437 collection quality and effectiveness, as well as effective in the operational procedures.  
1438 For phase 2 hospitals will be maintained according to a ranking based on the primary  
1439 outcome observed during phase 1 until the needed number of clusters is reached.

1440 This strategy will minimize possible post-randomization drop-outs.

1441 ii) Follow-up

1442

1443 Data from patients included in the study referring to in-hospital stay will be  
1444 collected from medical records. Data referring to 90 day follow up will be collected by  
1445 the Central Office health care professional in a telephone interview.

1446 The informed consent at the patient level for this trial is obtained only for the  
1447 purpose of the 90-day follow up. Therefore, since the admission information is retrieved  
1448 from the medical records, we will have data from all patients included in the trial.

1449 Withdrawal may occur only at the 90-day follow up. Any withdrawal at this level will  
1450 be stated in the CONSORT diagram (Figure 1).

1451 **Figure 1.** Recruitment (Cluster/Patients) – CONSORT Flow Chart

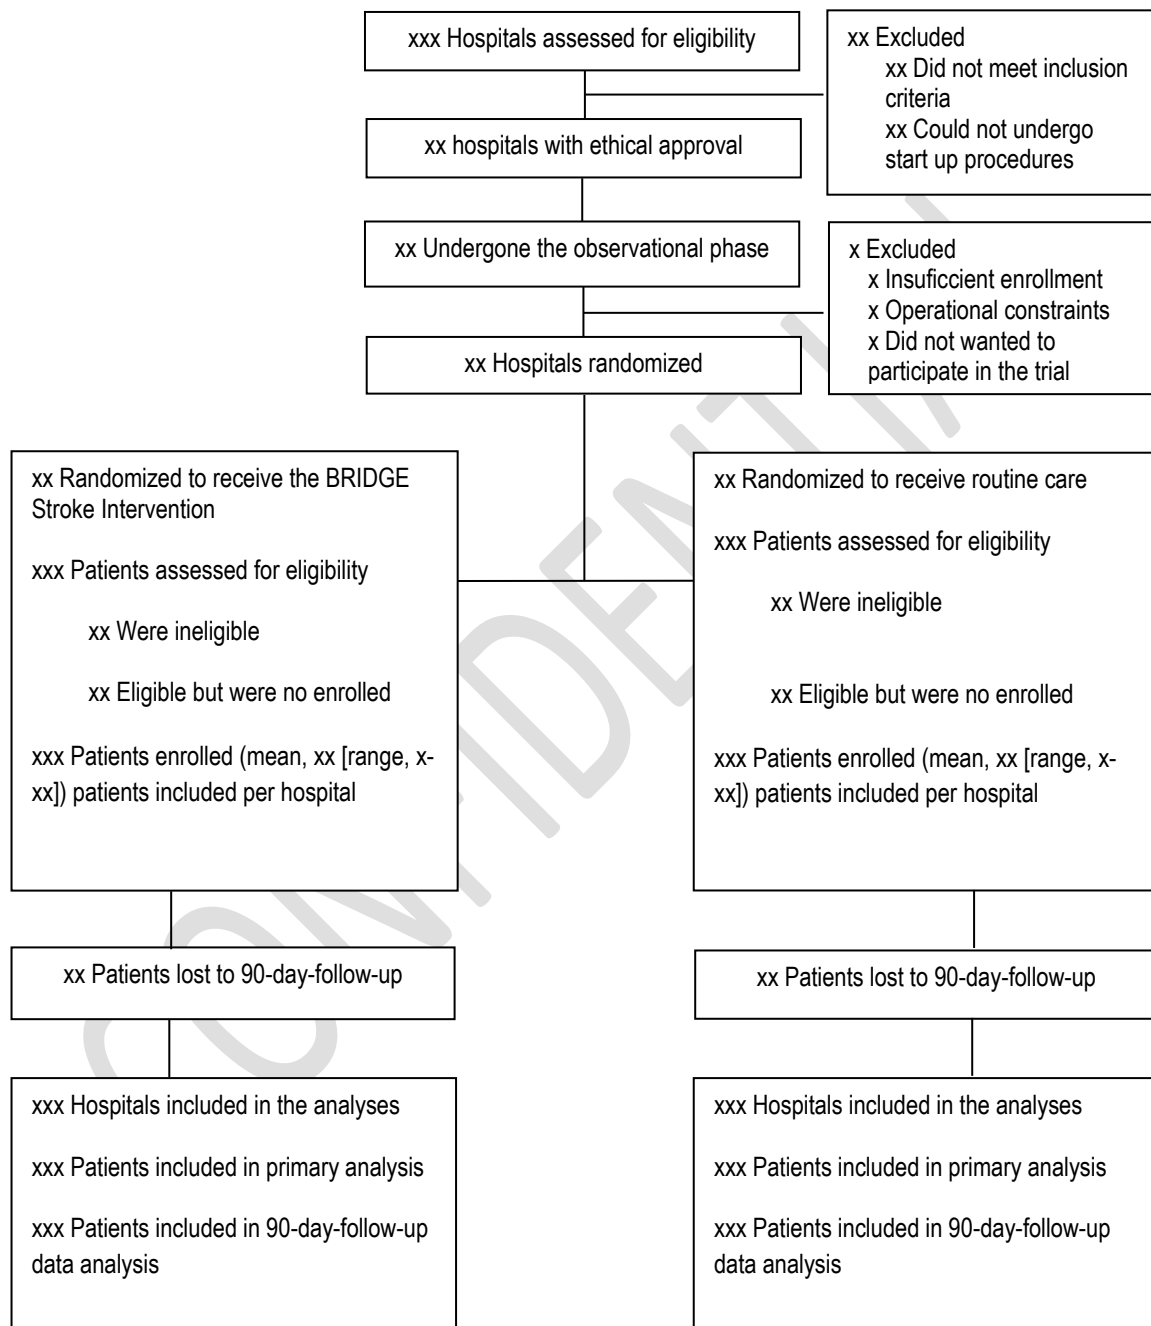

1495 **e) Sample size**

1496 **i) Phase 1**

1497 Because of the reduced availability of resources compared to the sites evaluated  
1498 in these studies, it is expected that the prescription of evidence-based interventions in  
1499 the first 48 hours and at discharge is even lower in public hospitals (estimate of 40%).  
1500 Thus, in Phase 1, the goal was to include 40 stroke patients per participant hospital. This  
1501 sample size was sufficient to detect all the expected percentages (between 1.0% and  
1502 95%, depending on the type of evidence-based intervention) for indicators of health care  
1503 quality, considering an absolute sampling error of 10% and a significance level of 5%.

1504 This phase serves as baseline for the cluster randomized trial (Phase 2).  
1505 Outcomes estimates from this phase will be used for a new sample size calculation and  
1506 for defining the strata to be used in the randomization.

1507 The main purpose of the phase 1 analysis is identifying the variability of the  
1508 primary outcomes between clusters. Therefore, results will be presented as with the  
1509 correspondent estimates of the standard deviation (or variance) within cluster and  
1510 between clusters. These estimates will be generated by a mixed linear regression model  
1511 with random effects between clusters. These estimates are sufficient to express the intra-  
1512 cluster correlation coefficient (ICC) that will be used for the purpose of estimating the  
1513 sample size. The ICC ( $\rho$ ) is defined as:

$$\rho = \frac{\sigma_a^2}{\sigma_a^2 + \sigma_e^2},$$

1514 where  $\sigma_a^2$  refers to the random effect variance of the clusters (*clusters*) and  $\sigma_e^2$  to the  
1515 variance of the measure. In practical manners we can assume the ICC show how much  
1516 from the total variability is attributable to the clusters.

1517 Further details on ICC calculation and variations on the calculation for binary  
1518 outcomes (which will be used for secondary outcomes) are described in Hayes e  
1519 Moulton (2009)<sup>(34)</sup>.

1520 ii) Simulations for Phase 2

1521 Ideally, it is expected that after the implementation of a program to improve  
1522 clinical practice, evidence-based interventions are prescribed to most patients (about  
1523 90%). However, programs of clinical practice improvement have moderate effect

1524 (absolute increase of 10%) on the prescription of treatments with proven benefit. There  
1525 is no clear definition of the effect size expected for interventions of clinical practice  
1526 improvement in the literature because of the wide heterogeneity in terms of the design  
1527 of the available evidence, statistical power and methodological quality. Additionally,  
1528 the efficacy of different tools may vary according to the clinical setting.

1529 Unlike individual patient randomization where it is expected each patient being  
1530 independent from another, in cluster randomization patients treated in the same hospital  
1531 are expected to be similarly treated. In such situations it is necessary to consider this  
1532 dependence when estimating sample size. This is called intra-cluster correlation. As  
1533 previously observed in studies evaluating patient care, the ICC is approximately 0.05.  
1534 (31).

1535 Thus, considering fixed sized clusters of approximately 50 patients, a 0.086  
1536 mean difference in the Composite Adherence Score, with 5% statistical significance we  
1537 estimated the following scenarios differing according to standard deviation (SD), power  
1538 and intra-cluster coefficient (ICC):

1539

1540 **Table 1.** Estimated sample size scenarios prior to Phase 1.

| Mean difference | Standard Deviation | ICC  | Power | Sample (number of clusters per arm) | Total sample size (number of Patients) |
|-----------------|--------------------|------|-------|-------------------------------------|----------------------------------------|
| 0.086           | 0.25               | 0.05 | 90%   | 15                                  | 1500                                   |
| 0.086           | 0.25               | 0.10 | 80%   | 18                                  | 1800                                   |
| 0.086           | 0.20               | 0.10 | 90%   | 16                                  | 1600                                   |
| 0.086           | 0.20               | 0.15 | 80%   | 17                                  | 1700                                   |

1541

1542 In case a high variability between hospitals is observed, or the pattern of  
1543 prescription is much different from expected, or more sites needed to be dropped after  
1544 Phase 1, a new sample size calculation was anticipated before starting Phase 2.

1545 iii) Sample size in Phase 2

1546 The previous statement about sample size was done before acquiring data in  
1547 Phase 1. Our expectations were accurate regarding the standard deviations; however the  
1548 observed ICC was higher (around 0.25). Consequently, assuming these findings and a

1549 significance level of 5%, a sample of 36 clusters, with mean inclusion of 40 patients per  
1550 cluster (around 1440 patients), the trial will have 80% power to detect a 0.125  
1551 difference in mean **Composite Adherence Score**.

1552

1553 **f) Framework – Hypothesis**

1554

1555 The null hypothesis is that there is no difference in adherence to evidence-based  
1556 therapies for acute ischemic stroke or transient ischemic attack patients between the  
1557 usual care and the intervention group. The alternative hypothesis is that there is a  
1558 difference between the groups.

1559

1560 **g) Interim analysis and stopping guidance**

1561

1562 No interim analysis is planned for this trial.

1563

1564 **h) Timing of final analysis**

1565

1566 The final analysis for the BRIDGE Stroke trial is planned to take place after  
1567 patient recruitment, patient follow up, and events adjudication are completed.

1568

1569 **i) Timing of outcomes assessment**

1570

1571 The schedule of study procedures is given in the item 3.0 of the protocol. A  
1572 description of variables of interest is also given in item 3.10 as it is in the present  
1573 document.

1574 **5) Statistical principles**

1575

1576 All analysis will follow the intention-to-treat principle. Different interpretations  
1577 for the intention to treat principle regarding the analysis of missing data are used by

1578 different authors. In order to avoid misinterpretation, we define the intention-to-treat  
1579 principle to be used in our analysis as follows:

1580 4- The cluster allocated to the intervention group that don't follow or don't  
1581 adhere to the intervention will be instructed to proceed with data collection  
1582 irrespectively, and will be evaluated as the group that was originally  
1583 allocated. The same holds true for the control group, irrespective of possible  
1584 contamination.

1585 5- Patients who were not eligible for the study will be ignored in the analyses.

1586 6- Missing data from the primary composite outcome will be treated as  
1587 negative endpoints (worst case scenario imputation).

1588 The second criterion is justifiable by the outcomes definitions. For example, if a  
1589 patient initially suspected as stroke or TIA is included in the study but later the  
1590 diagnosis is not confirmed, means that this patient is not eligible to the study on the first  
1591 hand, and is not eligible to any of the components of the composite score.

1592 The third criteria is conservative, although the data regarding the components of  
1593 the primary outcome are easily obtained and it is expected (if any) a minimal missing  
1594 data rate (probably < 0.1%). Thus, data imputation shall be minimum and other forms  
1595 of imputation will be considered as sensitivity analysis.

1596 **a) Confidence intervals and P values**

1597

1598 Statistical tests and confidence intervals will be two-sided with 5% significance  
1599 level.

1600 **b) Adherence and protocol deviations**

1601

1602 All sites are required to include consecutive patients that meet the inclusion  
1603 criteria. In order to monitor possible screening failures, the coordinating center will  
1604 track the accrual speed according to the observed rates during Phase 1. Additionally, the  
1605 investigators sites are asked to send a detailed screening log on a weekly basis. Failure  
1606 to one of the above mentioned assumptions will raise the suspicion of screening failure.



1607 If this is the case, the sites will be asked to provide the hospitals' complete admission  
1608 list of suspected stroke (using ICD 10 codes) during the recruitment period and perform  
1609 another screening. Data from patients that failed the initial screening but are identified  
1610 in the second screening turn will be included in the analysis.

1611 Compliance to the Intervention is assessed by attendance in the investigators  
1612 meeting, outreach visits (local training), web conferences, and by the identification of  
1613 clear evidence that, for each patient, the materials were used by the local team.

1614 Descriptive statistics on the percentage compliance to the intervention per  
1615 cluster/site (N, mean, maximum, minimum) will be presented.

## 1616 **6) Analysis**

1617

### 1618 **a) Baseline characteristics**

1619

1620 Continuous variables will be described by mean and standard deviation  
1621 whenever there is a normal distribution, or median and/or interquartile amplitude  
1622 median and interquartile ranges in case of non-parametric distribution. Qualitative  
1623 variables will be presented as absolute frequencies (numbers) and relative frequencies  
1624 (percentages), as described in mock Table 2. Tests of statistical significance will not be  
1625 undertaken for baseline characteristics.

1626

1627

1628

1629

1630

1631

1632

1633

1634 **Table 2.** Clusters and Patients Baseline Characteristics

| <b>Characteristics</b>                             | <b>Intervention</b>                | <b>Control</b>                     |
|----------------------------------------------------|------------------------------------|------------------------------------|
| <b>Patient baseline characteristics</b>            | <b>(xx clusters; xxx patients)</b> | <b>(xx clusters; xxx patients)</b> |
| Men                                                | xx (xx%)                           | xx (xx%)                           |
| Age, mean (SD), y                                  | xx (xx)                            | xx (xx)                            |
| Diabetes                                           | xx (xx%)                           | xx (xx%)                           |
| Hypertension                                       | xx (xx%)                           | xx (xx%)                           |
| Dyslipidemia                                       | xx (xx%)                           | xx (xx%)                           |
| Current Smoking                                    | xx (xx%)                           | xx (xx%)                           |
| Family history of stroke                           | xx (xx%)                           | xx (xx%)                           |
| Family history of CAD                              | xx (xx%)                           | xx (xx%)                           |
| Stroke                                             | xx (xx%)                           | xx (xx%)                           |
| CAD                                                | xx (xx%)                           | xx (xx%)                           |
| Atrial fibrillation                                | xx (xx%)                           | xx (xx%)                           |
| Renal failure                                      | xx (xx%)                           | xx (xx%)                           |
| Use of aspirin in the last month                   | xx (xx%)                           | xx (xx%)                           |
| Use of anticoagulants in the last month            | xx (xx%)                           | xx (xx%)                           |
| Use of statins in the last month                   | xx (xx%)                           | xx (xx%)                           |
| Final Diagnosis                                    |                                    |                                    |
| AIS                                                | xx (xx%)                           | xx (xx%)                           |
| TIA                                                | xx (xx%)                           | xx (xx%)                           |
| <b>Cluster Baseline Characteristics</b>            |                                    |                                    |
| Neurologist Available at ED                        | xx (xx%)                           | xx (xx%)                           |
| Mechanical Thrombolysis/Thrombectomy Capabilities  | xx (xx%)                           | xx (xx%)                           |
| Stroke Unit                                        | xx (xx%)                           | xx (xx%)                           |
| Stroke Protocol Available at ED                    | xx (xx%)                           | xx (xx%)                           |
| Stroke Protocol available at the Hospital          | xx (xx%)                           | xx (xx%)                           |
| JCI Accreditation                                  | xx (xx%)                           | xx (xx%)                           |
| Teaching Hospital                                  | xx (xx%)                           | xx (xx%)                           |
| Prior participation in multicenter clinical trial  | xx (xx%)                           | xx (xx%)                           |
| Volume of patients seen in ED per mo, median [IQR] | xx [xx - xx]                       | xx [xx - xx]                       |
| Baseline rate of primary outcome                   | xx [xx - xx]                       | xx [xx - xx]                       |

Abbreviations: SD, standard deviation; CAD, coronary artery disease; AIS, acute ischemic stroke; TIA, transient ischemic attack, ED, emergency department; JCI, Joint Commission International; IQR, interquartile range.

1635

1636

**b) Outcomes**

1637

1638

**i) Primary outcome of the first phase**

1639

1640

- Proportion of prescription of evidence-based therapies

1641

- Barriers to implementation of methodologies.

1642

**ii) Secondary outcomes of the first phase**

1643

1644

- Disability (mRankin) in 90 days.

1645

- Mortality, in 90 days.

1646

- Stroke recurrence in 90 days.

1647

1648

**iii) Primary outcome of the second phase**

1649

1650

**Composite Adherence Score** is the primary outcome defined for each

1651

individual (i) as:

$$Z_i = \frac{\sum_{j=1}^{10} x_{ij}}{\sum_{j=1}^{10} y_{ij}}$$

1652

where  $j = \{1, \dots, 10\}$  represents each component (procedure) and

1653

$$y_{ij} = \begin{cases} 0, & \text{if patient } i \text{ isn't eligible for procedure } j \\ 1, & \text{if patient } i \text{ is eligible for procedure } j \end{cases}, \text{ and}$$

1654

$$x_{ij} = \begin{cases} 0, & \text{if the site didn't successfully performed the procedure } j \text{ on patient } i \\ 1, & \text{if the site successfully performed the procedure } j \text{ on patient } i \end{cases}.$$

1655

For this purpose, patients with contraindications (which are specific for each

1656

endpoint) were excluded from the denominators. The 10 components used in

1657 the score are the evidence based therapies in the first 48 hours that includes:  
1658 early antithrombotics, RT-PA, dysphagia screening, DVT Prophylaxis, Door  
1659 to Needle Time < 60 minutes, dysphagia screening. And Discharge  
1660 Therapies that includes: antithrombotics, lipid lowering agents for patients  
1661 with LDL  $\geq$  100 or not documented, anticoagulants for atrial fibrillation or  
1662 flutter, assessment for rehabilitation and smoke cessation education or  
1663 education. All the definitions of the procedures considered in the composite  
1664 score are described in Table 3.

1665 **iv) Secondary outcomes of the second phase**

- 1666
- 1667 • Proportion of prescription of evidence-based strategies in the first 48 hours  
1668 and at discharge cited in the primary outcome **individually** and in an "All or  
1669 None" model.
  - 1670 • Additional strategies usage (also with definition presented in Table 3):
    - 1671 ○ Global Rt-PA rate, defined as the number of stroke patients treated  
1672 with alteplase over the number of stroke patients admitted within 24  
1673 hours of symptoms onset.
    - 1674 ○ Anti Hipertensive agents at discharge.
    - 1675 ○ Door to needle time < 45 minuts
  - 1676 • Mortality at 90 days.
  - 1677 • Disability (mRankin) in 90 days.
  - 1678 • Stroke Recurrence in 90 days.
- 1679
- 1680
- 1681
- 1682
- 1683
- 1684
- 1685
- 1686
- 1687

1688 **Table 3.** Quality indicators

| <b>Name of Variable</b>     | <b>Description</b>                                               | <b>Inclusion</b>                                                                                                                                                                                                                                                                                                                      | <b>Exclusion</b>                                                    | <b>Numerator</b>                                                                                                                                                                                                                         |
|-----------------------------|------------------------------------------------------------------|---------------------------------------------------------------------------------------------------------------------------------------------------------------------------------------------------------------------------------------------------------------------------------------------------------------------------------------|---------------------------------------------------------------------|------------------------------------------------------------------------------------------------------------------------------------------------------------------------------------------------------------------------------------------|
| <b>Global Rt-PA Rate</b>    | Rt-PA Usage                                                      | All stroke patients admitted within 24 hours of symptoms                                                                                                                                                                                                                                                                              | Not applicable                                                      | Patients that receive Rt-PA                                                                                                                                                                                                              |
| <b>Rt-PA</b>                | Recombinant Plasminogen Activator used within therapeutic window | Eligible patients diagnosed with stroke who arrive at the hospital within 3.5 hours of symptom onset and who are treated within 4.5 hours of symptom onset.<br><br>*The subgroup of patients who arrive at the hospital within 02 hours of symptom onset and who are treated within 03 hours of symptom onset will also be evaluated. | Patients with medical contraindications or other documented reasons | Patients who received Rt-PA within 3.5 hours of symptom onset.<br><br>*The subgroup of patients who arrive at the hospital within 02 hours of symptom onset and who are treated within 03 hours of symptom onset will also be evaluated. |
| <b>Early Antithrombotic</b> | Antithrombotic therapy                                           | Eligible patients                                                                                                                                                                                                                                                                                                                     | Patient with any documented                                         | Patients treated with antithrombotic                                                                                                                                                                                                     |

|                                            |                                                                                                         |                                                                   |                                                                                                                   |                                                                                                                                                                                                                                                  |
|--------------------------------------------|---------------------------------------------------------------------------------------------------------|-------------------------------------------------------------------|-------------------------------------------------------------------------------------------------------------------|--------------------------------------------------------------------------------------------------------------------------------------------------------------------------------------------------------------------------------------------------|
| <b>Agents</b>                              | prescribed within 48 hours of admission (includes antiplatelet agents or anticoagulants).               | diagnosed with stroke or TIA                                      | medical contraindication as a reason for no treatment.                                                            | agents until the end of the 2nd day of admission (including ASA, ASA+dipyridamole, ticlopidine, clopidogrel, unfractionated heparin, low molecular weight heparin, and warfarin, but does not include SC heparin at prophylactic doses for DVT). |
| <b>Prophylaxis for DVT</b>                 | Patients at risk for DVT (unable to walk) who received DVT prophylaxis until the end of the second day. | Patients eligible for DVT prophylaxis with a diagnosis of stroke. | Patients who can walk at the end of the 2nd day. Excluding patients with any documented medical contraindication. | Patients treated with DVT prophylaxis until the end of the 2nd day of admission (including heparins, heparinoids, other anticoagulants or pneumatic compression devices).                                                                        |
| <b>Dysphagia Screening</b>                 | Dysphagia Screening prior to any oral intake                                                            | Patients with a diagnosis of stroke                               | Not Applicable                                                                                                    | Patients who are screened for dysphagia with validated tests before being given any food or fluids by mouth                                                                                                                                      |
| <b>Door-to-Needle Time &lt; 60 minutes</b> | Time since the patient's arrival to the hospital until the start of rt-PA infusion                      | Patients eligible for treatment with rt-PA                        | Patients with documented medical contraindication.                                                                | Patients treated with reperfusion therapy within 60 minutes of admission.                                                                                                                                                                        |
| <b>Door to needle &lt; 45 minutes</b>      | Time since the patient's arrival                                                                        | Patients eligible for                                             | Patients with documented                                                                                          | Patients treated with reperfusion                                                                                                                                                                                                                |

|                                                                |                                                                                                                                                                                           |                                                                                                                                                                                                            |                                                                                     |                                                                                                                                                                                |
|----------------------------------------------------------------|-------------------------------------------------------------------------------------------------------------------------------------------------------------------------------------------|------------------------------------------------------------------------------------------------------------------------------------------------------------------------------------------------------------|-------------------------------------------------------------------------------------|--------------------------------------------------------------------------------------------------------------------------------------------------------------------------------|
|                                                                | to the hospital until the start of rt-PA infusion                                                                                                                                         | treatment with rt-PA                                                                                                                                                                                       | medical contraindication.                                                           | therapy within 45 minutes of admission.                                                                                                                                        |
| <b>Oral Anticoagulation for Atrial Fibrillation or Flutter</b> | Anticoagulation prescribed at discharge for patients with documented atrial fibrillation or flutter during hospitalization                                                                | Eligible patients with diagnosis of stroke and a history of paroxysmal or persistent atrial fibrillation or atrial flutter during this hospitalization period.                                             | Patients with any documented medical contraindication as a reason for no treatment. | Patients who received anticoagulation at discharge (including therapeutic doses of heparin, heparinoids, warfarin, or other anticoagulants such as direct thrombin inhibitors. |
| <b>LDL <math>\geq</math> 100 or not documented</b>             | Statins prescribed upon discharge if LDL $\geq$ 100 mg/dL, if the patient was previously treated with lipid-lowering medication before the admission, and if LDL has not been documented. | Eligible patients with a diagnosis of stroke or TIA if LDL $\geq$ 100mg/dL, if the patient was previously treated with lipid-lowering medication before the admission, and if LDL has not been documented. | Patient with any documented medical contraindication as a reason for no treatment.  | Patients who received statins upon discharge (including statins, fibrates, niacin, binding resins, or selective cholesterol absorption inhibitors)                             |
| <b>Smoking Cessation</b>                                       | Intervention for smoking cessation (education or medication) prior to discharge for smokers.                                                                                              | Eligible patients with a diagnosis of stroke or TIA and smokers (defined as having initiated or maintained                                                                                                 | Patient with any documented medical contraindication as a reason for no treatment.  | Patients or their caregivers who received smoking cessation education or medication for smoking cessation before discharge.                                                    |

|                                    |                                                                                          |                                                                                |                                                                            |                                                                     |
|------------------------------------|------------------------------------------------------------------------------------------|--------------------------------------------------------------------------------|----------------------------------------------------------------------------|---------------------------------------------------------------------|
|                                    |                                                                                          |                                                                                | the habit of smoking in the last year).                                    |                                                                     |
| <b>Anti-hypertensive</b>           | Anti-Hypertensive prescribed prior to discharge for patients with diagnoses Hypertension | Eligible patients diagnosed with stroke and documented history of hypertension | Patients with any documented contra indication for antihypertensive usage. | Patients who receive anti-hypertensive agents at discharge          |
| <b>Assessed for Rehabilitation</b> | Patients assessed by or treated by rehabilitation professional                           | All patients diagnosed with stroke                                             | Not Applicable                                                             | Patients who are assessed by or who receive rehabilitation services |

1689                   • \*See attached the table containing the main contraindications to the above  
1690                   mentioned therapies.

1691  
1692                   Stroke Recurrence, mRankin and Mortality definitions and quality control  
1693                   procedures to access those outcomes are described in detail in the Protocol.

1694                   **c) Analysis methods**

1695  
1696                   Results will be separated per group (intervention vs control). Clusters  
1697                   characteristics will be presented first, followed by the patient's characteristics. As  
1698                   described in mock Table 1. Adherence to the quality improvement intervention will be  
1699                   reported, as the time from training until intervention onset. Descriptive statistics on time  
1700                   from site activation until first patient inclusion will also be reported.

1701                   The primary outcome will be analyzed using a mixed effects linear regression  
1702                   model with random effects to account for the correlation of observations within clusters.  
1703                   This model will consider residuals assuming a normal distribution. We intend to  
1704                   perform a sensitivity analysis considering a mixed effect linear model that better suits  
1705                   the real distribution of the data (beta distribution models, binomial distribution using the  
1706                   sum of each component, for example).



1707 The choice for the most simple model (with possible failure on the assumptions)  
1708 over a most complex one was made due to lack of background in the literature  
1709 supporting other methods for better sample size estimation assuming the same type of  
1710 outcome used in our study. However, we understand that this choice estimates a more  
1711 conservative (larger) sample size.

1712 The components of the primary outcome will be individually evaluated using  
1713 mixed effects general linear models considering binomial distribution (logistic  
1714 regression with random effect at the intercept (cluster adjusted)).

1715 All models (including the primary outcome) will be adjusted for the cluster's  
1716 baseline value.

1717 Treatment effects will be expressed as absolute mean difference or the  
1718 composite outcome and odds ratio with the respective 95% confidence intervals for the  
1719 individual components. Preferentially following the mock Table 4.

1720 **Table 4.** Adherence to individual performance measures and primary outcome  
1721 assessment between groups.

| Outcome                                                          | Intervention<br>(xx clusters;<br>xxx patients) | Control<br>(xx clusters;<br>xxx patients) | Odds Ratio<br>[95%CI]        | P<br>value | ICC  |
|------------------------------------------------------------------|------------------------------------------------|-------------------------------------------|------------------------------|------------|------|
| <b>Primary Endpoint</b>                                          |                                                |                                           |                              |            |      |
| Composite adherence score (%) - mean<br>(sd) <sup>a</sup>        | xx.x ± xx.x                                    | xx.x ± xx.x                               | x.x [-x.x; x.x] <sup>d</sup> | x.xx       | x.xx |
| <b>Secondary Endpoints</b>                                       |                                                |                                           |                              |            |      |
| Acute Interventions during first 48 hours<br>window <sup>b</sup> |                                                |                                           |                              |            |      |
| IV Rt-PA within therapeutic                                      | xx (xx.x%)                                     | xx (xx.x%)                                | x.x [-x.x; x.x]              | x.xx       | x.xx |
| Door-to-needle time < 60 min                                     | xx (xx.x%)                                     | xx (xx.x%)                                | x.x [-x.x; x.x]              | x.xx       | x.xx |
| Early Antithrombotics                                            | xx (xx.x%)                                     | xx (xx.x%)                                | x.x [-x.x; x.x]              | x.xx       | x.xx |
| DVT Prophylaxy                                                   | xx (xx.x%)                                     | xx (xx.x%)                                | x.x [-x.x; x.x]              | x.xx       | x.xx |
| Discharge therapies                                              |                                                |                                           |                              |            |      |
| Antithrombotics                                                  | xx (xx.x%)                                     | xx (xx.x%)                                | x.x [-x.x; x.x]              | x.xx       | x.xx |
| Anticoagulants for AF or Flutter                                 | xx (xx.x%)                                     | xx (xx.x%)                                | x.x [-x.x; x.x]              | x.xx       | x.xx |
| LDL >-100 or not documented                                      | xx (xx.x%)                                     | xx (xx.x%)                                | x.x [-x.x; x.x]              | x.xx       | x.xx |
| Smoking Cessation Education                                      | xx (xx.x%)                                     | xx (xx.x%)                                | x.x [-x.x; x.x]              | x.xx       | x.xx |
| Assessed for Rehabilitation                                      | xx (xx.x%)                                     | xx (xx.x%)                                | x.x [-x.x; x.x]              | x.xx       | x.xx |
| Dysphagia Evaluation                                             | xx (xx.x%)                                     | xx (xx.x%)                                | x.x [-x.x; x.x]              | x.xx       | x.xx |

Complete adherence to all acute and specified discharge therapies)<sup>c</sup>

xx (xx.x%)    xx (xx.x%)    x.x [-x.x; x.x]    x.xx    x.xx

ICC denotes intraclass correlation coefficient. IV Rt-PA denotes intravenous recombinant plasminogen activator. DVT denotes deep venous thrombosis.

<sup>a</sup>Composite adherence score: early antithrombotics, Rt-PA < 3.5h, DVT prophylaxis, door-to-needle time < 60 min, dysphagia screening, assessed for rehabilitation, antithrombotics at discharge, anticoagulants for atrial fibrillation or flutter, LDL ≥ 100 or not documented (statins), smoke cessation education<sup>b</sup>.

<sup>b</sup>RtPA in eligible patients (who arrive at the hospital within 3.5hours of symptom onset).

<sup>c</sup>Patients who received all the therapies: Rt-PA within therapeutic window (patients who arrived within 3.5 hours of symptom and treated within 4.5h of symptom onset), antithrombotic in 48h, antithrombotic in 7 days, prophylaxis for DVT, door-to-needle time < 60, oral anticoagulation for AF or Flutter, statins in LDL ≥ 100 or undocumented, intervention for smoking cessation, assessed for rehabilitation, dysphagia evaluation.

<sup>d</sup>Mean difference in 95% CI

1722

1723            We intend to perform at least two sensitivity analyses: an adjusted analysis for  
1724 hospital status (teaching vs non-teaching) and presence of a stroke unit. And a second  
1725 sensitivity analysis considering only those sites that followed the protocol, in which  
1726 patients were consecutively included without loss, and those sites that actually  
1727 implement the proposed interventions (*per protocol analysis*).

1728            Pre-specified subgroup analysis, for which interaction by group will be assessed  
1729 as follows: teaching hospital (or not), presence of a stroke unit, presence of a  
1730 neurologist in the emergency department, final diagnosis (AIS vs TIA), and country.

1731            Disability will be assessed by the mRankin scale primarily in a dichotomous  
1732 model (proportion of patients with mRankin < 2) in patients with AIS using logistic  
1733 mixed regression models considering the cluster and time (patient longitudinal measure)  
1734 dependencies, and secondarily by a shift analysis.

1735            Secondary outcomes clinical outcomes in hospital will be evaluated similar to  
1736 other dichotomous comparisons using mixed logistic regression models. Events  
1737 evaluated in the 90 days follow up will be compared using proportional hazards frailty  
1738 models<sup>(3)</sup> with random intercept according to cluster (site), and effects estimates will be  
1739 presented as Hazard Ratios. Results will be adjusted by site's Phase 1 events rates and  
1740 will be presented as suggested in mock Table 5.

1741 **Table 5.** Clinical outcomes comparisons between groups

| Clinical Outcomes              | Intervention<br>(xx clusters;<br>xxx patients) | Control<br>(xx clusters;<br>xxx patients) | Odds Ratio<br>95%CI | P<br>value | ICC  |
|--------------------------------|------------------------------------------------|-------------------------------------------|---------------------|------------|------|
| <b>Events (in hospital)</b>    |                                                |                                           |                     |            |      |
| Stroke Recurrence              | xx.x (xx.x%)                                   | xx.x (xx.x%)                              | x.x [x.x; x.x]      | x.xx       | x.xx |
| Hemorrhagic Transformation     | xx.x (xx.x%)                                   | xx.x (xx.x%)                              | x.x [x.x; x.x]      | x.xx       | x.xx |
| Non fatal cardiac arrest       | xx.x (xx.x%)                                   | xx.x (xx.x%)                              | x.x [x.x; x.x]      | x.xx       | x.xx |
| Major Bleeding                 | xx.x (xx.x%)                                   | xx.x (xx.x%)                              | x.x [x.x; x.x]      | x.xx       | x.xx |
| Acute Coronary Syndrome        | xx.x (xx.x%)                                   | xx.x (xx.x%)                              | x.x [x.x; x.x]      | x.xx       | x.xx |
| Total Mortality                | xx.x (xx.x%)                                   | xx.x (xx.x%)                              | x.x [x.x; x.x]      | x.xx       | x.xx |
| Cardiovascular Mortality       | xx.x (xx.x%)                                   | xx.x (xx.x%)                              | x.x [x.x; x.x]      | x.xx       | x.xx |
| <b>Events (within 90 days)</b> |                                                |                                           |                     |            |      |
| Stroke Recurrence              | xx.x (xx.x%)                                   | xx.x (xx.x%)                              | x.x [x.x; x.x]*     | x.xx       | x.xx |
| Total Mortality                | xx.x (xx.x%)                                   | xx.x (xx.x%)                              | x.x [x.x; x.x]*     | x.xx       | x.xx |
| Cardiovascular Mortality       | xx.x (xx.x%)                                   | xx.x (xx.x%)                              | x.x [x.x; x.x]*     | x.xx       | x.xx |

Abbreviations: ICC denotes intracluster correlation coefficient.

\* Effects in 90 days expressed as Harazd Ratios

1742

1743 **d) Additional analysis**

1744

1745

1746

1747

1748

1749

1750

1751

Other models regarding the peculiar distribution of the primary outcome may be explored. Results as it is pre-specified should be enough to report the study results, however alternatives models such as mixed effects logistic regressions models considering the eligible procedure for the composite score as sample unit and Bayesian hypothesis tests using site's Phase 1 information as *prior* distribution to the randomized phase, and other proposals of primary outcome definition giving different weights for the procedures are some pre-specified alternatives.

1752

1753

Anticipated sub-analysis for subsequent sub-studies include: cross country analysis, stroke unit sub-population.

1754

**e) Statistical software**

1755

1756

Analyses will be done using R software<sup>(4)</sup>

1757

1758       **REFERENCES**

1759

1760

1761

1762

1763

1764

1765

1. Sutton CJ, Watkins CL, Dey P. Illustrating problems faced by stroke researchers: a review of cluster-randomized controlled trials. *International journal of stroke : official journal of the International Stroke Society*. 2013;8(7):566-74.

1766

1767

3. Ripatti S, Palmgren J. Estimation of multivariate frailty models using penalized partial likelihood. *Biometrics*. 2000;56:1016–1022.

1768

1769

4. R Core Team. *R: A Language and Environment for Statistical Computing*. Vienna, Austria, 2017.

1770

1771

CONFIDENTIAL
