# Supplementary material
Source: PubMed Central journal article supplement (PMC6692700)
Supplement: jamaneurol-76-932-s002.pdf [file jamaneurol-76-932-s002.pdf]

## Supplementary Material

Machline-Carrion MJ, Santucci EV, Damiani LP, et al; BRIDGE-Stroke Investigators. Effect of a quality improvement intervention on adherence to therapies for patients with acute ischemic stroke and transient ischemic attack: a cluster randomized clinical trial. *JAMA Neurol*. Published online May 6, 2019. doi:10.1001/jamaneurol.2019.1012

**eMethods 1.** Details of the Baseline Observational Phase

**eMethods 2.** Details of the Intervention

**eTable 1.** Use of Evidence-Based Therapies During the Observational Phase

**eTable 2.** Adherence to the Multifaceted Quality Improvement Intervention

**eTable 3.** Results of Quality Improvement Intervention on Use of Evidence-Based Therapies for Patients With Acute Ischemic Stroke

**eTable 4.** Results of Quality Improvement Intervention on Use of Evidence-Based Therapies for Patients with Transient Ischemic Attack

**eTable 5.** Results of Quality Improvement Intervention on Use of Evidence-Based Therapies

This supplementary material has been provided by the authors to give readers additional information about their work.

## **eMethods 1. Details of the Baseline Observational Phase**

We conducted a baseline survey in participating clusters using the same eligible criteria for patient's inclusion (approximately 30 patients per cluster were prospectively included in this phase). This survey was conducted before randomization to avoid potential systematic errors caused by awareness of allocation to intervention and control groups. In all participating clusters, data were collected prospectively by a trained independent research nurse. Adherence to guidelines was assessed by a chart review, patient files, and physician prescriptions. Data were entered using a web-based data capture system as the same tool as that in the formal trial. The main objective of the baseline pre-randomization survey was to assess whether clusters were comparable regarding baseline adherence to evidence-based performance measures and to obtain reliable estimates for our sample size estimation as reported in the main text and in the study protocol. We used the same endpoint definition used in the randomized phase. The composite measure was defined as the total number of interventions performed among eligible patients divided by the total number of possible interventions among eligible patients. Results from this survey are available in eTable 1.

## **eMethods 2. Details of the Intervention**

The multifaceted quality improvement intervention includes case management, a therapeutic plan roadmap and checklist, educational materials, interactive workshops, and periodic audit and feedback reports to each cluster.

#### *Case Management*

Case management is conducted by a team of health professionals from each cluster, including a physician leader and trained nurses. The teams are responsible for the timely delivery of the materials and for checking the implementation of effective management, supporting the management when it is needed and acting as quality improvement monitors.

#### *Reminders and Treatment Algorithm*

To facilitate the visualization of important interventions and their relation to the time of care, different reminders may be used: a) Patient wristband (Patient Bracelet) and b) a therapeutic plan (Treatment Algorithm) to be attached to the admission form or medical record. The reminders and Treatment Algorithm were designed to be implemented in sequence during the management of AIS and TIA patients. First, a colored wristband is given to an AIS or TIA potential patient. Once a potential diagnosis is given to a patient, the nurse gives the attending physician a Treatment Algorithm. This algorithm consists of a therapeutic plan “roadmap” for quick reference and checking, guiding the physician and nurses from appropriate AIS or TIA diagnosis confirmation to the complete sequence of adequate treatments required during hospitalization until hospital discharge. The treatment management plan requires that the attending physician check and confirm the use of all suggested evidence-based interventions. The colored wristband (bracelet) helps promptly identify AIS or TIA patients in the emergency department and in subsequent units (e.g. intensive care units, infirmary etc) to avoid delays in initiating recommended therapies.

#### **Patient Wristband**

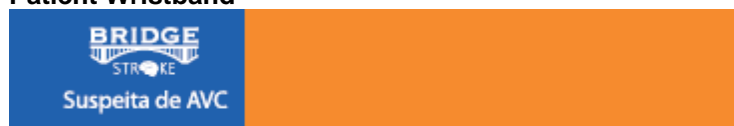

# Therapeutic Plan

## PLANO TERAPÊUTICO

SUSPEITA DE AVC

**Anotar**

NHSS: \_\_\_\_\_

PA: \_\_\_\_\_ mmHg

Glicemia: \_\_\_\_\_ mg/dL

Temperatura: \_\_\_\_\_ °C

SaO<sub>2</sub>: \_\_\_\_\_ %

Peso: \_\_\_\_\_ kg

**Avaliar**

Sinais e sintomas sugestivos

Obter uma história curta direcionada

Exame físico

**Acionar**

Médico/Neuro

Tomografia

Laboratório

Farmácia

**Obter**

Acesso venoso

Hemograma

Plaquetas

TTPA

TP/RNI

Eletrólitos

Glicemia

TGO/TGP/Creatinina e ureia

ECG

TC

CONFIRMADO SUSPEITA DE AVC?

Duração dos sintomas? <6h | ≥6h

Sim → **Monitorar/Cuidar**

Não → Seguir protocolo da instituição

**Eligível para trombólise (avaliar critérios, ver no verso)**

Sim

Não

**Objetivos**

Paleta-agulha < 60 min

Porta-reperusão < 90 min

Dose de alteplase (0,9 mg/kg - máx. 90 mg)

Total: \_\_\_\_\_ ml / Bolus (10%): \_\_\_\_\_ ml

Infusão (60 min): \_\_\_\_\_ ml

Monitorar/Cuidar

Tratar se PAS > 220 mmHg ou PAD > 120 mmHg

Considerar administração de antiplaquetários

Considerar profilaxia para TVP

Para todos os pacientes

Triagem para distúrbio\*

Avaliação da fisioterapia\*

Perfil lipídico

Doppler de Carótidas ou angle TC

ECG - Fibrilação atrial ou flutter?

(\*Não se aplica para AIT)

DURANTE E APÓS TROMBÓLISE

**Monitorar**

PA - 15 em 15 min, nas primeiras 2 h/30 min 30 min, até a 6ª hora

NHSS - 15 em 15 min, na primeira 1 h/30 em 30 min, até a 6ª hora

PAS - até 185 mmHg e PAD 110 mmHg

**Cuidar**

Repouso

Evitar sondagem vesical

Jejum até triagem de diágnose

Evitar punção cutânea e venosa

Manter sem antitrombótico

Não passar sonda nasoesférica

**Interromper e solicitar TC**

Cefaleia

Dispneia

Redução do sensório

Aumento de PA

Sangramento

Ver o verso

2º DIA

Cuidado

Paciente restito ao leito?

↳ Considerar profilaxia medicamentosa ou mecânica

Checar TC de controle ou RM

Reabilitação

Avaliação fonoaudiológica realizada?

Avaliação fisioterapêutica realizada?

Prevenção secundária

Aspirina ou clopidogrel

ECG: FA ou flutter?

↳ Considerar anticoagulação oral

Estatina se:

↳ LDL > 100 ou dislipidemia

↳ AVC aterotrombótica

↳ Uso prévio

Educação

Guia de orientação ao paciente

Tabagista?

↳ Considerar medicação e/ou aconselhamento psicológico

↳ Orientação verbal para cessação de tabagismo

3º DIA

Prevenção secundária

Etiologia definida do AVC?

- Aterotrombótica
- Embólica
- Pequenos vasos
- Citopéptica
  - ↳ Considerar ECGs seriadas e/ou Itahar

Educação

Guia de orientação

Medidas para cessação do tabagismo

Prevenção secundária

Aspirina ou clopidogrel

Anticoagulante oral se FA ou flutter

Estatina

Antihipertensivo

Reabilitação

Encaminhamento para fisioterapia e fonoaudiologia

## CRITÉRIOS PARA TROMBÓLISE

### CONTRAINDICAÇÕES ABSOLUTAS:

- Evidência de hemorragia intracraniana (HIC) no exame de tomografia computadorizada
- Sintomas de AVC iniciando há mais de 4,5 horas do início do infarto
- Pacientes recebendo tratamento anticoagulante oral efetivo (ex: varfarina sódica com INR > 1,7) ou em uso de novas anticoagulantes orais (NOACs)
- Pacientes em uso de heparina nas últimas 48 horas com TTPa acima do limite de normalidade
- História de AVC recente ou trauma craniano significativo nos últimos 3 meses
- História de hemorragia intracraniana, neoplasia intracraniana, aneurisma cerebral ou malformações arteriovenosas
- Infarto extenso com hipodensidade > 1/3 do território do hemisfério cerebral no tomografia de admissão
- Hipertensão arterial grave refratária ao tratamento (sistólica > 185 mmHg ou diastólica > 110 mmHg)
- Cirurgia extensa ou procedimento invasivo nas últimas 2 semanas
- Punção recente (7 dias) de um vaso sanguíneo em sítio não compressível (ex: punção de veia jugular ou subclávia)
- Dílatação hemorrágica aguda, TP prolongada (INR > 1,7), TTPa prolongada ou plaquetas < 100.000/mm3
- Sangramento grave ativo, recente ou com risco iminente
- Cirurgia intracraniana ou de coluna vertebral recente
- Massagem cardíaca externa traumática recente (menos de 10 dias)
- Endocardite bacteriana, pericardite, pancreatite aguda, gravidez
- Neoplasia com risco de sangramento elevado
- Doença hepática grave, incluindo insuficiência hepática, cirrose, hipertensão portal (varizes esofágicas)
- Sintomas sugestivos de hemorragia subaracnóidea ou dissecação de aorta
- Crianças com menos de 18 anos de idade
- Hiperensibilidade conhecida a príncipio ativo, gentamicina ou qualquer componente do fármulo

### CONTRAINDICAÇÕES RELATIVAS:

- Quando o momento de início do sintoma for desconhecido
- Déficit neurológico mínimo ou sintomas melhorando completa e rapidamente antes do início da infusão
- Acidente vascular cerebral grave à avaliação clinicamente (ex: NIHSS > 25) e/ou por técnicas de imagem avançadas
- Infarto do miocárdio recente (últimos 3 meses)
- Consulta no início do acidente vascular cerebral
- Glicemia < 50 ou > 400 mg/dl
- Covid-19
- Sangramento gastrointestinal ou geniturinário nas últimas 3 semanas

### CRITÉRIOS PARA INCLUSÃO PARA TROMBECTOMIA MECÂNICA:

- Idade ≥ 18 anos
- Oclusão de artéria carótida interna ou artéria cerebral média proximal (M1)
- Pontuação ≥ 6 na escala de AVC no NIH
- Tomografia de crânio com pontuação ≥ 6 na escala ASPECTS
- Pontuação 0-1 na escala de MRanking antes do AVC atual
- Início do tratamento (punção arterial) em até 6 horas do início dos sintomas
- Ter recebido TPA IV em até 4,5 horas (se dentro da janela terapêutica)

### SE SANGRAMENTO DURANTE E APÓS TROMBÓLISE:

- Garantir dois acessos venosos periféricos calibrosos
- Solicitar avaliação da neurocirurgia
- Solicitar exames urgentes:
  - Hb/Ht
  - TP/TTPa
  - Plaquetas
  - Fibrinogênio
  - Exame pré-transfusional

### (Preencher quando não houver etiqueta)

Nome: \_\_\_\_\_  
 Registro: \_\_\_\_\_  
 Leitor: \_\_\_\_\_

### Educational Posters:

These posters are distributed by the emergency department and in all hospital units to draw the attention of the team about techniques that can support better practices.



**NOSSO HOSPITAL  
ESTÁ PARTICIPANDO  
DO ESTUDO  
BRIDGE STROKE.**

UMA INICIATIVA PARA  
MELHORAR O ATENDIMENTO  
DOS PACIENTES COM AVC.

**ATENÇÃO:**  
TODO PACIENTE COM ESTA PULSEIRA DE IDENTIFICAÇÃO  
SEGUIR O PLANO TERAPÊUTICO ABAND

**PLANO TERAPÊUTICO**





**ATENÇÃO PARA OS SINAIS DE AVC!  
PRIORIDADE NO ATENDIMENTO!**





| Boca torta                                                                          | Perda de força                                                                      | Dificuldade na fala                                                                 |
|-------------------------------------------------------------------------------------|-------------------------------------------------------------------------------------|-------------------------------------------------------------------------------------|
|  |  |  |
| <b>Sorria</b><br>Peça para dar um sorriso                                           | <b>Abrace</b><br>Peça para elevar os braços                                         | <b>Música</b><br>Repita a frase como uma música                                     |

**Stroke Symptoms (FAST) Poster**

*Educational Materials:*

To each hospital printed, physical or electronic material are provided to support and motivate best practices. These materials included a rt-PA kit case, a bedside dysphagia screening test, the NIH Stroke Scale, a medication brochure, and a patient educational brochure.

| Avaliação Rápida de Acidente Vascular Cerebral<br>Escala de Acidente Vascular Cerebral NIHSS (versão curta)                                                                                                                                                                                                                                                                                                                                                                                                                                                                                  |                                                                                                                                                                                                                                                                                                            | PONTUAÇÃO |          |      |
|----------------------------------------------------------------------------------------------------------------------------------------------------------------------------------------------------------------------------------------------------------------------------------------------------------------------------------------------------------------------------------------------------------------------------------------------------------------------------------------------------------------------------------------------------------------------------------------------|------------------------------------------------------------------------------------------------------------------------------------------------------------------------------------------------------------------------------------------------------------------------------------------------------------|-----------|----------|------|
|                                                                                                                                                                                                                                                                                                                                                                                                                                                                                                                                                                                              |                                                                                                                                                                                                                                                                                                            | Admissão  | 72 horas | Alta |
| <p><i>Avaliar os itens da escala de acidente vascular cerebral na ordem listada. Registrar o desempenho em cada categoria após o exame de cada item. Não volte e não reavalie pontuações. Siga orientações fornecidas sobre o exame de exame. As pontuações devem refletir o que o paciente faz e não o que o médico acredita que o paciente possa fazer. O médico deve registrar as respostas enquanto aplica o exame e trabalhar rapidamente. Exceto onde for indicado, o paciente não deve ser orientado ou seja, pedidos repetidos para que o paciente faça um esforço especial.</i></p> |                                                                                                                                                                                                                                                                                                            |           |          |      |
|                                                                                                                                                                                                                                                                                                                                                                                                                                                                                                                                                                                              |                                                                                                                                                                                                                                                                                                            | Admissão  | 72 horas | Alta |
| 1a                                                                                                                                                                                                                                                                                                                                                                                                                                                                                                                                                                                           | Consciência<br>0 = Acordado.<br>1 = Sonolento.<br>2 = Emipes.<br>3 = Coma, ausência de alongamento / flexão, nenhuma resposta motora.                                                                                                                                                                      |           |          |      |
| 1b                                                                                                                                                                                                                                                                                                                                                                                                                                                                                                                                                                                           | Orientação<br>0 = Não dá mais corretos na primeira tentativa.<br>1 = Uma correta, ou intubado, diátese grave ou burburido para fala.<br>2 = Nenhuma correta ou afásico ou anômico.                                                                                                                         |           |          |      |
| 1c                                                                                                                                                                                                                                                                                                                                                                                                                                                                                                                                                                                           | Seguir comandos<br>0 = Obedece ambos comandos.<br>1 = Obedece um.<br>2 = Não obedece nenhum comando ou comete.                                                                                                                                                                                             |           |          |      |
| 2                                                                                                                                                                                                                                                                                                                                                                                                                                                                                                                                                                                            | Olhar<br>0 = Normal.<br>1 = Paralisação parcial (N, NI, NI).<br>2 = Desvio lateral do olhar que pode ser superado (ultrapassa a linha média).<br>3 = Desvio lateral do olhar que não ultrapassa a linha média.                                                                                             |           |          |      |
| 3                                                                                                                                                                                                                                                                                                                                                                                                                                                                                                                                                                                            | Campo Visual<br>0 = Normal.<br>1 = Anópsia ou estrabismo de quadrante.<br>2 = Hemianópsia completa.<br>3 = Cegueira.                                                                                                                                                                                       |           |          |      |
| 4                                                                                                                                                                                                                                                                                                                                                                                                                                                                                                                                                                                            | Movimento Facial<br>0 = Normal.<br>1 = Uma paralisia parcial, ou simétrica ligeira.<br>2 = Existência parcial ou paralisia facial central.<br>3 = Paralisia bilateral ou paralisia ou com.                                                                                                                 |           |          |      |
| 5a                                                                                                                                                                                                                                                                                                                                                                                                                                                                                                                                                                                           | Mantém o braço esquerdo erguido<br>0 = Braço mantido erguido normalmente por 10 segundos.<br>1 = Braço deixado lento e parcialmente para baixo.<br>2 = Braço rigidamente flexionado completamente para baixo.<br>3 = Braço despareado, porém sem qualquer movimento proximal.<br>4 = Sem movimento ou com. |           |          |      |
| 5b                                                                                                                                                                                                                                                                                                                                                                                                                                                                                                                                                                                           | Mantém o braço direito erguido<br>0 = Braço mantido erguido normalmente por 10 segundos.<br>1 = Braço deixado lento e parcialmente para baixo.<br>2 = Braço rigidamente flexionado completamente para baixo.<br>3 = Braço despareado, porém sem qualquer movimento proximal.<br>4 = Sem movimento ou com.  |           |          |      |
| 6a                                                                                                                                                                                                                                                                                                                                                                                                                                                                                                                                                                                           | Mantém a perna esquerda erguida<br>0 = Perna mantida erguida normalmente por 5 segundos.<br>1 = Perna deixada lenta e parcialmente para baixo.<br>2 = Perna rigidamente flexionada completamente para baixo.<br>3 = Perna despareada, porém sem qualquer movimento proximal.<br>4 = Sem movimento ou com.  |           |          |      |
| 6b                                                                                                                                                                                                                                                                                                                                                                                                                                                                                                                                                                                           | Mantém a perna direita erguida<br>0 = Perna mantida erguida normalmente por 5 segundos.<br>1 = Perna deixada lenta e parcialmente para baixo.<br>2 = Perna rigidamente flexionada completamente para baixo.<br>3 = Perna despareada, porém sem qualquer movimento proximal.<br>4 = Sem movimento ou com.   |           |          |      |

|       | PONTUAÇÃO                                                                                                                                                                  | PONTUAÇÃO |          |      |
|-------|----------------------------------------------------------------------------------------------------------------------------------------------------------------------------|-----------|----------|------|
|       |                                                                                                                                                                            | Admissão  | 72 horas | Alta |
| 7     | Ataxia<br>0 = Sem ataxia, paciente não compreende, paralisia ou com.<br>1 = Ataxia em um membro.<br>2 = Ataxia nos dois membros.                                           |           |          |      |
| 8     | Sensibilidade<br>0 = Normal.<br>1 = Perda sensorial leve.<br>2 = Perda sensorial total ou com.                                                                             |           |          |      |
| 9     | Fala<br>0 = Normal.<br>1 = Dificuldade de encontrar palavras, afásia leve.<br>2 = Dificuldade clara para conversar.<br>3 = Afasia global, paralisia motora ou com.         |           |          |      |
| 10    | Disartria<br>0 = Sem disartria.<br>1 = Disartria, pode ser bem compreendida.<br>2 = Disartria, dificilmente inteligível ou paralisia não respondida ou com.                |           |          |      |
| 11    | Extinção<br>0 = Sem anormalidade.<br>1 = Extinção de uma modalidade sensorial ou outro sinal de negligência.<br>2 = Extinção de duas ou mais modalidades sensorial ou com. |           |          |      |
| TOTAL |                                                                                                                                                                            |           |          |      |

Referências:  
 National Institute of Health, NINDS, NIH Stroke Scale.  
 Accessed on 10/01/2011 at [http://www.ninds.nih.gov/ctr/stroke/nihs\\_sstroke\\_scale.pdf](http://www.ninds.nih.gov/ctr/stroke/nihs_sstroke_scale.pdf).  
 Agreement for the assessment of Post-Stroke in stroke patients. Stroke, 1993; 24(24):477.

## NIH Stroke Scale

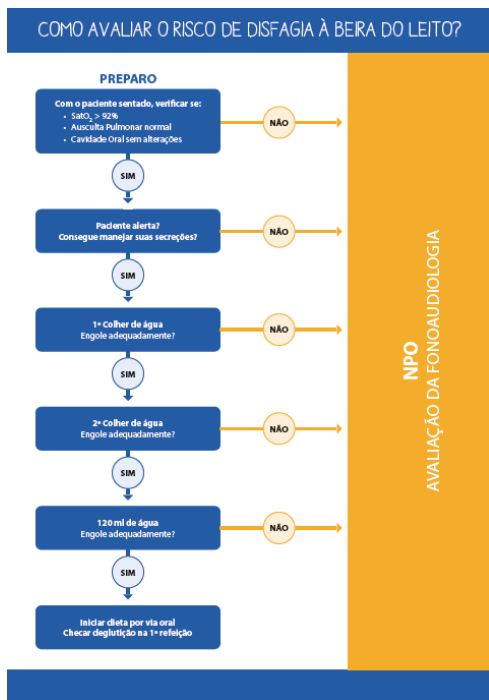

## Dysphagia Screening Bedside Test

## Medication Brochure

# FOLHETO DE ORIENTAÇÃO DE medicamentos

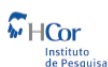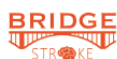

### HIPOLIPEMIANTE

| Fármaco         | Nome comercial                                                              | Apresentação | Dose       |
|-----------------|-----------------------------------------------------------------------------|--------------|------------|
| Atorvastatina   | Lipitor®, Citalor®, Atorless®, Kolevas®, Lipigran®, Lipistat®               | Comprimidos  | 10 a 80 mg |
| Rosuvastatina   | Crestor®, Rosucor®, Rosustati®                                              | Comprimidos  | 5 a 40 mg  |
| Sinvastatina    | Zocor®, Clinfar®, Lipotex®, Sinvallip®, Sinvascor®, Sinvastaco®, Sinvatrox® | Comprimidos  | 10 a 40 mg |
| Pravastatina    | Pravacol®, Lenitra®, Mevalotin®                                             | Comprimidos  | 10 a 80 mg |
| Lovastatina     | Mevacor®, Lovaton®                                                          | Comprimidos  | 20 a 40 mg |
| Fluvastatina XL | Lescol®                                                                     | Comprimidos  | 20 a 80 mg |
| Pitavastatina   | Livalo®                                                                     | Comprimidos  | 1 a 4 mg   |
| Ezetimibe*      | Zetia®                                                                      | Comprimidos  | 10 mg      |

| Reações adversas:                                                                                                                  | Precauções para reduzir Miopatia, evitar as seguintes drogas quando possível:                                                                                                                                                                                                                                                                                                           |
|------------------------------------------------------------------------------------------------------------------------------------|-----------------------------------------------------------------------------------------------------------------------------------------------------------------------------------------------------------------------------------------------------------------------------------------------------------------------------------------------------------------------------------------|
| <ul style="list-style-type: none"> <li>Mialgia com ou sem elevação da creatinoquinase (CK)</li> <li>Rabdomiólise é rara</li> </ul> | <ul style="list-style-type: none"> <li>Niacina</li> <li>Fibratos (genfibrozila)</li> <li>Diltiazem, Verapamil</li> <li>Azitromicina, Laritromicina, Eritromicina</li> <li>Fluconazol, Itraconazol, Cetoconazol</li> <li>Amprenavir, Indinavir, Nelfinavir, Ritonavir, Saquinavir</li> <li>Ciclosporina, Tacrolimus</li> <li>Nefazodona</li> <li>Sildenafil</li> <li>Digoxina</li> </ul> |

### ANTITROMBÓTICOS

| Droga                               | Apresentação         | Nome comercial                                                                                                  | Dose                                                                                                                                                                                                                                                                                                          |
|-------------------------------------|----------------------|-----------------------------------------------------------------------------------------------------------------|---------------------------------------------------------------------------------------------------------------------------------------------------------------------------------------------------------------------------------------------------------------------------------------------------------------|
| Ácido Acetilsalicílico/<br>Aspirina | 100/325/500/         | AAS®, Gencardia®, Aspirina®, Dori®, Melhoral®, Somalgin®, Caprin®, Nu-Seals®, Albyl®, Micropirin®, Angettes 75® | 100 a 300 mg<br>1x/dia                                                                                                                                                                                                                                                                                        |
| Clopidogrel                         | 75mg                 | Plavix®, Iscover®                                                                                               | 75 mg<br>1x/dia                                                                                                                                                                                                                                                                                               |
| Dipiridamol                         | 75 e 100 mg          | Persantin®, Persantin Retard®                                                                                   | 75 ou 100 mg<br>3 a 4x/dia                                                                                                                                                                                                                                                                                    |
| Ticagrelor                          | 90 mg                | Brilinta®                                                                                                       | 90 mg<br>2x/dia                                                                                                                                                                                                                                                                                               |
| Warfarina                           | 2,5/5,0<br>ou 7,5 mg | Marevan®                                                                                                        | RNI<br>2,0 -3,0                                                                                                                                                                                                                                                                                               |
| Dabigatrana                         | 110 e 150 mg         | Pradaxa®                                                                                                        | 300mg /dia (150 mg 12/12h)<br>- A posologia deve ser reduzida para 150 mg de Pradaxa (2 cápsulas de 75 mg) uma vez ao dia em pacientes com insuficiência renal moderada (CLcr de 30-50 mL/min).<br>- Pacientes ≥80 anos devem ser tratados com dose diária de 220 mg (1 cápsula de 110 mg duas vezes ao dia). |



### ANTITROMBÓTICOS

| Contra indicação                                                                                                                                                                                                                                                                                                                                                                                                                                                                                                                                                                                                               | Efeitos colaterais                                                                                                                                                                                                                                                                                                                                                                                                                                                                        |
|--------------------------------------------------------------------------------------------------------------------------------------------------------------------------------------------------------------------------------------------------------------------------------------------------------------------------------------------------------------------------------------------------------------------------------------------------------------------------------------------------------------------------------------------------------------------------------------------------------------------------------|-------------------------------------------------------------------------------------------------------------------------------------------------------------------------------------------------------------------------------------------------------------------------------------------------------------------------------------------------------------------------------------------------------------------------------------------------------------------------------------------|
| Hipersensibilidade, asma, úlcera péptica, insuficiência renal, hepática e cardíaca graves, gestação (último trimestre)                                                                                                                                                                                                                                                                                                                                                                                                                                                                                                         | Dispepsia, micro-hemorragias, náuseas, vômitos; sangramentos, síndrome de Rey, hepatite são raros                                                                                                                                                                                                                                                                                                                                                                                         |
| Úlcera péptica, hemorragia intracraniana, gestação, hipersensibilidade                                                                                                                                                                                                                                                                                                                                                                                                                                                                                                                                                         | Dispepsia, constipação, dor abdominal, diarreia, alterações cutâneas; Hemorragias são pouco frequentes                                                                                                                                                                                                                                                                                                                                                                                    |
| Hipersensibilidade                                                                                                                                                                                                                                                                                                                                                                                                                                                                                                                                                                                                             | Cefaleia, náusea, vômito, desconforto gastrointestinal, hipotensão                                                                                                                                                                                                                                                                                                                                                                                                                        |
| Hipersensibilidade, sangramento patológico ativo, hemorragia intracraniana prévia, insuficiência hepática grave                                                                                                                                                                                                                                                                                                                                                                                                                                                                                                                | Dispneia, cefaleia, epistaxe, sangramentos (menos comuns)                                                                                                                                                                                                                                                                                                                                                                                                                                 |
| Doença hepática ou renal grave, hemorragia, gestação, lactação, hipersensibilidade, 24 horas pré e pós parto ou cirurgia, incapacidade para compreender o tratamento ou indisponibilidade de laboratório confiável próximo                                                                                                                                                                                                                                                                                                                                                                                                     | Náusea, vômito, diarreia, flatulência, pancreatite, cefaleia, anafilaxia, alergia, nefropatias, letargia, exantema, urticária, hemotórax, sangramento nasal, leucopenia, anemia                                                                                                                                                                                                                                                                                                           |
| Hipersensibilidade conhecida à dabigatrana ou ao etexilato de dabigatrana ou a algum dos excipientes do produto<br>- Insuficiência renal grave (CLcr < 30 mL/min), pois não há dados que apoiem o uso nestes pacientes<br>- Manifestações hemorrágicas, pacientes com diateses hemorrágicas, ou pacientes com comprometimento espontâneo ou farmacológico da hemostasia<br>- Lesão de órgãos em risco de sangramento clinicamente significativo, inclusive acidente vascular cerebral hemorrágico nos últimos 6 meses<br>- Tratamento concomitante com cetoconazol sistêmico<br>- Pacientes com próteses de válvulas cardíacas | Sangramento, anemia, epistaxe, hemorragias gastrointestinal, urogenital e cutânea, dor abdominal, diarreia, dispepsia, náusea, trombocitopenia, hipersensibilidade, prurido, rash, hemorragias incluindo intracraniana, hematoma, hemoptise, disfagia, úlcera gastrointestinal e esofágica, gastroesofagite, doença do refluxo gastroesofágico, vômitos, função hepática anormal, urticária, angioedema, hematrose, hemorragia no local de injeção/cateter/incisão, hemorragia traumática |

### ANTITROMBÓTICOS

| Droga        | Apresentação | Nome comercial | Dose                                                                                                                                                              |
|--------------|--------------|----------------|-------------------------------------------------------------------------------------------------------------------------------------------------------------------|
| Rivaroxabana | 15 e 20 mg   | Xarelto*       | 20 mg/dia<br>(15 mg/dia em pacientes com CLcr < 50-30 mL/min)                                                                                                     |
| Apixabana    | 2,5 e 5 mg   | Eliquis*       | 5 mg 12/12h<br>(2,5 mg em pacientes com pelo menos 2 das seguintes Características:<br>Idade ≥ 80 anos,<br>Peso corporal ≤ 60 kg<br>Creatinina sérica ≥ 1,5 mg/dL |

### ANTIHIPERTENSIVO/IECA

| Classe farmacológica                                           | Fármaco              | Nome comercial                                                                                    |
|----------------------------------------------------------------|----------------------|---------------------------------------------------------------------------------------------------|
| Diuréticos tiazídicos                                          | Hidroclorotiazida    | Clorana*, Dranol*, Diuretic*, Hidroflux*                                                          |
|                                                                | Clortalidona         | Higroton*, Clordilon*, Clortalil*, Clorton*, Drenidra*, Neolidona*                                |
| Agentes poupadores de potássio                                 | Espironolactona      | Aldactone*, Aldostarim*, Diacqua*, Espirona*, Spiroctan*                                          |
| Betabloqueadores seletivos                                     | Atenolol             | Ablok*, Angipress*, Atenopres*, Pfenaco*                                                          |
|                                                                | Metoprolol Succinato | Selozok*, Selopress*, Zok*                                                                        |
|                                                                | Metoprolol Tartarato | Popressor*                                                                                        |
| Agentes alfa e betabloqueadores                                | Carvedilol           | Coreg*, Cardilol*, Carvedilat*, Divalol*, Ictus*, Karvil*                                         |
| Betabloqueadores não seletivos                                 | Propranolol          | Inderal*, Rebaten LA*, Antitersin*, Hipernolol*                                                   |
| Antiadrenérgicos de ação central                               | Metildopa            | Aldomet*                                                                                          |
| Bloqueadores seletivos dos canais de cálcio (dihidropiridina)  | Anlodipino           | Norvasc, Amlocor*, Amlovasc*, Anlo*, Anlodibal*, Cordarex*, Nicord*, Novarsc*, Pressat*, Roxflan* |
|                                                                | Nifedipino           | Adalat*, Adalat Oros*, Adalat Retard*, Cardalin*, Dilaflex*, Oxcord Retard*, Oxcord*              |
| Bloqueadores seletivos dos canais de cálcio (fenilalquilamina) | Verapamil            | Dilacoron*, Coronaril*, Dilacor*, Neo Verpami*, Vasoton*                                          |

ANTIHIPERTENSIVO/IECA

| Concentração                   | Dose mínima  | Dose máxima | Tomadas ao dia |
|--------------------------------|--------------|-------------|----------------|
| 12,5 mg/25 mg                  | 12,5 – 25 mg | 50 mg       | 1              |
| 25 mg ou 100 mg                | 25 mg        | 100 mg      | 1 - 2          |
| 50 mg/100 mg                   | 25 mg        | 100 mg      | 1 - 2          |
| 25 mg/50 mg/100 mg             | 25 - 100 mg  | 200 mg      | 1 - 2          |
| 100 mg                         | 25 - 100 mg  | 200 mg      | 1 - 2          |
| 3.125 mg/6,25 mg/12,5 mg/25 mg | 12,5 mg      | 50 mg       | 1 - 2          |
| 10 mg/40 mg                    | 40 mg        | 240 mg      | 2 - 3          |
| 250 mg                         | 500 mg       | 1.500 mg    | 2 - 3          |
| 5 mg/10 mg                     | 5mg          | 10 mg       | 1              |
| 10 mg                          | 20 - 40 mg   | 60 mg       | 3              |
| 80 mg/120 mg                   | 80 - 120 mg  | 480 mg      | 2 - 3          |

ANTIHIPERTENSIVO/IECA

| Classe farmacológica                                 | Fármaco         | Nome comercial                                                                                   |
|------------------------------------------------------|-----------------|--------------------------------------------------------------------------------------------------|
| Agentes que atuam no músculo liso Arteríolar         | Hidralazina     | Apresolina®, Nepresol®                                                                           |
| Inibidores da enzima conversora de angiotensina IECA | Captopril       | Capoten®, Capotril®                                                                              |
|                                                      | Enalapril       | Renitec®, Eupressin®, Pressotec®, Vasopril®, Atens®, Enaprotac®, Angiotril®, Zestril®, Prinivil® |
|                                                      | Cilazapril      | Vascase®, Cardiotril®, Inibace®                                                                  |
|                                                      | Lisinopril      | Zestril®, Prinivil®, Ecapril®, Lipril®                                                           |
|                                                      | Perindopril     | Coversyl®                                                                                        |
|                                                      | Ramipril        | Triatec®, Verzatec®                                                                              |
| Trandolapril                                         | Gopten®, Odnik® |                                                                                                  |
| Antagonistas da angiotensina II BRA - ARA II         | Losartana       | Cozaar®, Corus®, Torlés®, Valtrian®, Zaarpress®, Zart®                                           |

Contra-indicações:

- Beta Bloqueadores: doença broncoespástica (DPOC, asma), bloqueio átrio-ventricular de 2º ou 3º grau, depressão maior (relativa), diabetes mellitus (tipo 1), dislipidemia (relativa), doença vascular periférica (relativa);
- Diuréticos: gota (relativa), dislipidemia (relativa para diurético em altas doses), diabetes tipos 1 e 2 (relativa para diurético em altas doses);
- Bloqueadores do cálcio: bloqueio átrio-ventricular de 2º ou 3º grau, insuficiência cardíaca (relativa);
- IECA: gestação, doença renovascular (relativa);
- Metildopa: doença hepática, disfunção erétil.

ANTIHIPERTENSIVO/IECA

| Concentração     | Dose mínima | Dose máxima | Tomadas ao dia |
|------------------|-------------|-------------|----------------|
| 25 mg/25 mg      | 25 mg       | 200 mg      | 2              |
| 25 mg            | 25 mg       | 150 mg      | 2 - 3          |
| 5 mg/10 mg/20 mg | 5 mg        | 40 mg       | 1 - 2          |
|                  |             |             |                |
|                  |             |             |                |
|                  |             |             |                |
|                  |             |             |                |
| 20 mg            | 25 mg       | 100 mg      | 1              |

Medication Brochure

Patient Education Brochure

### MEDICAMENTOS

| Hipoglicemiante |      |      |
|-----------------|------|------|
| Nome            | Dose | Hora |
|                 |      |      |
|                 |      |      |
|                 |      |      |

| Antitrombóticos |      |      |
|-----------------|------|------|
| Nome            | Dose | Hora |
|                 |      |      |
|                 |      |      |
|                 |      |      |

| Antihipertensivo/ECA |      |      |
|----------------------|------|------|
| Nome                 | Dose | Hora |
|                      |      |      |
|                      |      |      |
|                      |      |      |

| Antidiabético |      |      |
|---------------|------|------|
| Nome          | Dose | Hora |
|               |      |      |
|               |      |      |
|               |      |      |



Tenha uma vida mais Saudável

URGENTE

DIFICULDADE NA FALA




Música

Repita a frase como uma música

LIGUE SAMU 192

ATENÇÃO PARA OS SINAIS DE AVC!  
PRIORIDADE NO ATENDIMENTO!

BOCA TORTA



Sorria

Peça para dar um sorriso

PERDA DE FORÇA



Abraça

Peça para elevar os braços

NÃO SE ARRISQUE!

OS SEGUINTE FATORES AUMENTAM O RISCO DE TER UM AVC. PRESTE ATENÇÃO!



- PRESSÃO ALTA
- COLESTEROL ALTO
- DIABETES
- SOBREPESO E OBESIDADE
- OUTRAS DOENÇAS DO CORAÇÃO
- HISTÓRIA FAMILIAR DE AVC.

CUIDE-SE!

- 1 FAÇA CONSULTAS COM O SEU MÉDICO
- 2 TOME OS REMÉDIOS INDICADOS PELO MÉDICO. ELES AJUDAM A DIMINUIR O RISCO DE AVC!

### UM FUMANTE TEM:

- Risco 10 vezes maior de adoecer de câncer de pulmão;
- 5 vezes maior de sofrer infarto;
- 5 vezes maior de sofrer de bronquite crônica e enfisema pulmonar;
- 2 vezes maior de sofrer derrame cerebral.

**Após 2 dias**  
Seu olfato já percebe melhor os cheiros e seu paladar já degusta melhor a comida.

**Após 3 semanas**  
Você vai notar que sua respiração se torna mais fácil e a circulação melhora.

### ATIVIDADE FÍSICA VIGOROSA

Atividade aeróbica de intensidade vigorosa significa que você está respirando com dificuldade e rápido, e sua frequência cardíaca subiu um pouco. Se você está trabalhando neste nível, você não será capaz de dizer mais do que algumas palavras sem pausa para respirar. Aqui estão alguns exemplos de atividades que requerem esforço vigoroso:

Fonte: American Heart Association

25 MIN DE

75 MIN DE

3 DIAS POR SEMANA

ATIVIDADE FÍSICA VIGOROSA

Correr, Nadar, Andar de bicicleta rapidamente (16 km/h), Jogar tênis simples, Jogar basquete, Andar rapidamente, Hidroginástica, Dança de salão, Jardinagem em geral

---

### DEZ PASSOS PARA UMA ALIMENTAÇÃO VEGETAL E SAUDÁVEL

1. Faça refeições com variedade de alimentos vegetais.
2. Escolha alimentos vegetais ricos em fibras, como grãos integrais, legumes, frutas e nozes.
3. Limite o consumo de alimentos ricos em gordura saturada e sódio.
4. Evite o consumo de alimentos ultraprocessados.
5. Coma com frequência em pequenas porções.
6. Coma com frequência em pequenas porções.
7. Coma com frequência em pequenas porções.
8. Coma com frequência em pequenas porções.
9. Coma com frequência em pequenas porções.
10. Coma com frequência em pequenas porções.

1. Faça refeições com variedade de alimentos vegetais.

2. Escolha alimentos vegetais ricos em fibras, como grãos integrais, legumes, frutas e nozes.

3. Limite o consumo de alimentos ricos em gordura saturada e sódio.

4. Evite o consumo de alimentos ultraprocessados.

5. Coma com frequência em pequenas porções.

6. Coma com frequência em pequenas porções.

7. Coma com frequência em pequenas porções.

8. Coma com frequência em pequenas porções.

9. Coma com frequência em pequenas porções.

10. Coma com frequência em pequenas porções.

### Audit and Feedback Reports

Periodical audit and feedback reports on performance are provided to each hospital allocated to the intervention group. This strategy stimulates the teams to seek continuous improvement. Additionally, this report is discussed in periodic web or phone conferences to review the performance measures and set with aspects needed to improve. To each cluster we have an idea on the recruitment performance based on the observational phase information. Thus, after randomization we provided to the intervention sites their observational adherence to therapies rates and we established that the report would be sent when 25%, 50% and 75% of the sample was recruited. The report was sent by email to the principal investigator and case manager, then a conference call was set with these professionals in order to discuss adherence to the therapies and possible opportunities for improvement. It was up to the investigator and case manager to provide further internal feedback

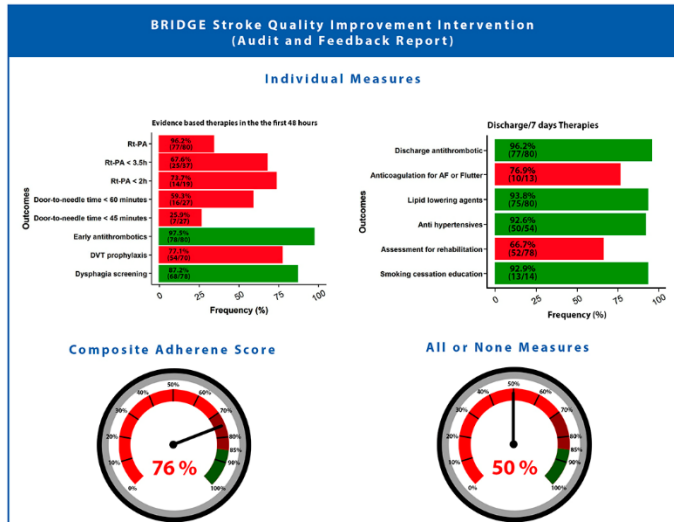

### Interactive Training Workshops

Interactive training workshops were planned as follows; a) During an investigators' meeting where the principal investigator and lead case manager from each site allocated to the intervention group will receive a simulation-based training developed in small groups and addressing the techniques to implement the intervention, or b) During outreach visits developed in each hospital when members of the quality improvement committee perform a diagnostic visit addressing the actual clinical pathway at each hospital and together with the local teams (including representatives from the emergency department physicians, neurologists, nurses from the emergency department, stroke units, intensive care units and infirmary) help tailoring the intervention to the needs of each site. It will also be stimulated that each participating site disseminates the intervention to other professionals from the institution using the same materials used during the meeting and outreach visits. Additionally, the principal investigator and the case managers were asked to provide the coordinating center evidence on the dissemination to at least 80% of the personnel involved in stroke and TIA care. The BRIDGE Stroke training techniques will also be available in a video that will be used during the training sessions. This video is also available for the hospitals so that they can use it as a continuous improvement tool.

### Case Management Slide Set

# BRIDGE

## STROKE

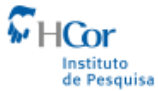

## Fluxo de Gerenciamento de Casos

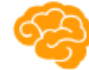

### FERRAMENTAS DA INTERVENÇÃO

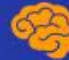

**ATENÇÃO**  
 TODOS OS PACIENTES COM ODI-  
 AVALIAÇÃO DE RISCO DE OBTENÇÃO  
 DE UM ACV (AVC) TRANSFERIDO  
 PARA O HOSPITAL ESTÁ  
 PARTICIPANDO DO ESTUDO  
 BRIDGE STROKE, UMA INICIATIVA  
 PARA MELHORAR O ATENDIMENTO  
 DOS PACIENTES COM AVC.

**PLANO TERAPÊUTICO**

**Pôster de Identificação**

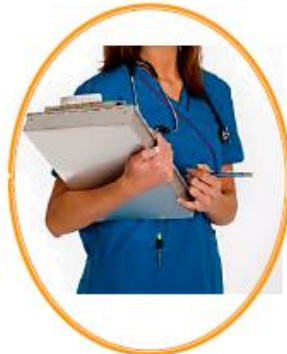

Case Manager

**PLANO TERAPÊUTICO**

**Plano Terapêutico**

**Pulseira de Identificação**

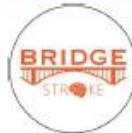

Botton

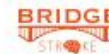

# MATERIAIS de APOIO

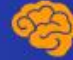

**ATENÇÃO PARA OS SINAIS DE AVC! PRIORIDADE NO ATENDIMENTO!**

**FALTA DE FORÇA**  
Faca parte do seu corpo

**FALTA DE CONSCIÊNCIA**  
Perda parcial ou total do despertar

**DIFICULDADE NA FALA**  
Mudança na fala, palavras após palavras

Pôster SINAIS de ALERTA

**NIHSS**

|                                          |             |
|------------------------------------------|-------------|
| Paralisação unilateral do rosto          | 0-4         |
| Paralisação unilateral do braço superior | 0-4         |
| Paralisação unilateral do braço inferior | 0-4         |
| Paralisação unilateral da perna superior | 0-4         |
| Paralisação unilateral da perna inferior | 0-4         |
| Alteração da consciência                 | 0-5         |
| Alteração da fala                        | 0-4         |
| Alteração da escrita                     | 0-2         |
| Alteração da leitura                     | 0-2         |
| Alteração da atenção                     | 0-2         |
| Alteração da matemática                  | 0-2         |
| Alteração da memória                     | 0-2         |
| Alteração da orientação                  | 0-2         |
| <b>Total</b>                             | <b>0-25</b> |

NIHSS

Brochura de Educação ao Paciente

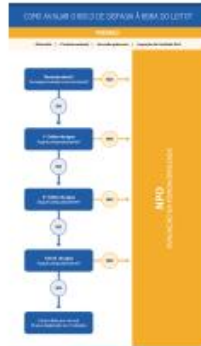

Triagem para Disfagia

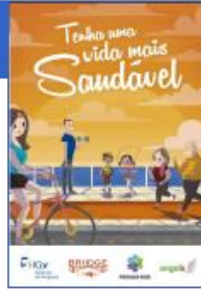

Folheto de Medicamentos

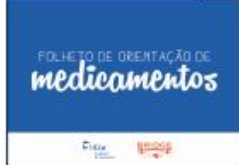

Maleta de Medicamentos

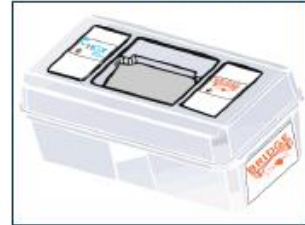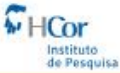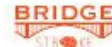

# Quem participa do Gerenciamento de Casos

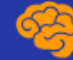

**TRIAGEM**

**SALA DE EMERGÊNCIA**

**UNIDADE DE AVC**

**UTI**

**UNIDADE DE INTERNAÇÃO**

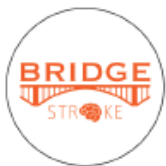

EMERGENCISTA

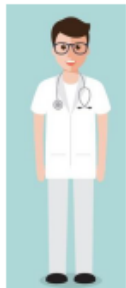

NEUROLOGISTA

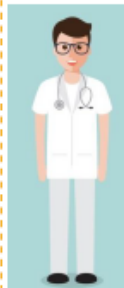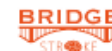

# BRIDGE

## STROKE

### TRIAGEM

#### TRIAGEM

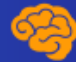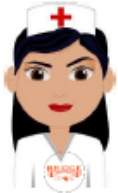

ENFERMEIRA DA TRIAGEM

1) **Identifica** o caso suspeito de AVC ou AIT

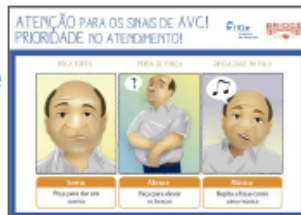

2) **Coloca** a **Pulseira** no Paciente

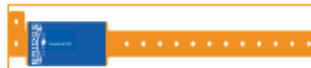

3) **Coloca** o **Plano Terapêutico** a Ficha de Admissão do Paciente

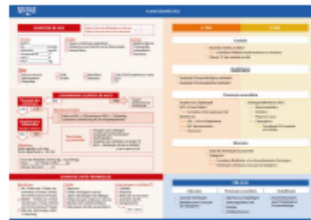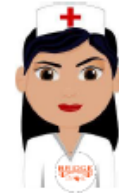

ENFERMEIRA DA SALA DE EMERGÊNCIA

4) **Transfere** o paciente para a **SALA de EMERGÊNCIA**

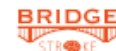



# BRIDGE

## STROKE

### 1º DIA

### SALA DE EMERGÊNCIA – Avaliação Inicial

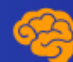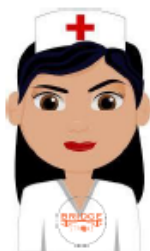

#### ENFERMEIRA(O)

- **ACIONAR:**
  - Médico - Neurologista
  - Tomografia
  - Laboratório
  - Farmácia
- **OBTER:**
  - Sinais vitais
  - Labs, TC, ECG

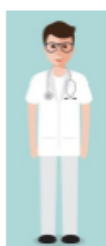

#### MÉDICO

- História Direcionada
- Exame Físico
- NIHSS

**BRIDGE**  
STROKE
PLANO TER

**SUSPEITA DE AVC**

**Anotar**

NIHSS: \_\_\_\_\_

PA: \_\_\_\_\_ mmHg

Glicemia: \_\_\_\_\_ mg/dL

Temperatura: \_\_\_\_\_ °C

SatO<sub>2</sub>: \_\_\_\_\_ %

Peso: \_\_\_\_\_ Kg

**Avaliar**

Sinais e sintomas sugestivos

Obtenha uma história curta direcionada

Exame físico

**Acionar**

Médico/Neuro

Tomografia

Laboratório

Farmácia

**Obter**

|                                        |                                 |                                      |                                                     |
|----------------------------------------|---------------------------------|--------------------------------------|-----------------------------------------------------|
| <input type="checkbox"/> Acesso venoso | <input type="checkbox"/> TTPA   | <input type="checkbox"/> Eletrolitos | <input type="checkbox"/> TGO/TGP/Creatinina e Ureia |
| <input type="checkbox"/> Hemograma     | <input type="checkbox"/> TP/RNI | <input type="checkbox"/> Glicemia    | <input type="checkbox"/> ECG                        |
| <input type="checkbox"/> Plaquetas     |                                 |                                      | <input type="checkbox"/> TC                         |

Data e Hora da Admissão no Serviço \_\_\_\_\_

Data e Hora do Início dos Sintomas \_\_\_\_\_

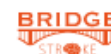

# SALA DE EMERGÊNCIA - TOMOGRAFIA

## Confirmação do Diagnóstico / Eleição para Trombólise

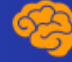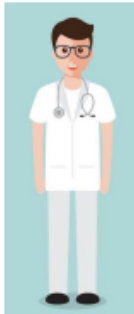

### MÉDICO

- Confirmação do Diagnóstico de AVC
- Eleição para Trombólise

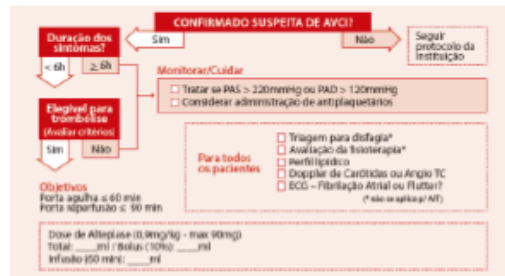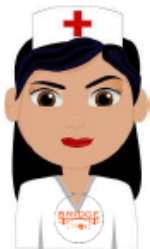

### ENFERMEIRA(O)

- Checar a dose de Alteplase

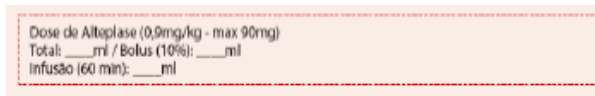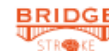

# TOMOGRAFIA

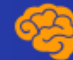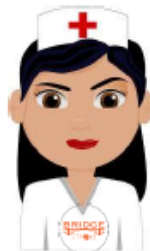

ENFERMEIRA da SALA de EMERGÊNCIA

### Maleta para Trombólise

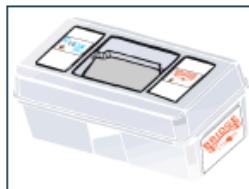

- ✓ Alteplase
- ✓ Equipos
- ✓ Seringa e Agulha

✓ Avalia a Tomografia

✓ Define a conduta

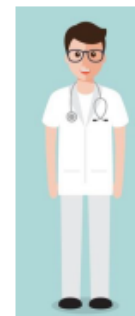

NEUROLOGISTA

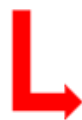

**Aplicação do Bolus de Alteplase**

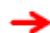

**Retorna para Emergência/Unidade de AVC/ UTI**

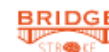

# SALA DE EMERGÊNCIA/ UTI/ UNIDADE DE AVC

## Cuidados Pós Trombólise

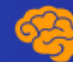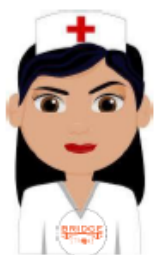

**ENFERMEIRA da SALA de EMERGÊNCIA**

### Monitorização durante a trombólise

#### DURANTE E APÓS TROMBÓLISE

##### Monitorar

- PA 15'min em 15'min nas primeiras 2 horas/ 30'min em 30'min até as 6ª horas
- NIHSS - 15'min em 15'min na primeira 1 hora/ 30'min em 30'min até as 6ª horas
- PAS até 185mmHg e PAD 110mmHg

##### Cuidar

- Repouso
- Evitar sondagem vesical
- Jejum até triagem de disfagia
- Evitar punção cutânea e venosa
- Manter sem antitrombótico
- Não passar sonda nasoentérica

##### Interromper e solicitar TC

- Cefaleia
- Dispneia
- Redução do sensorio
- Aumento de PA
- Sangramento

↳ Ver o verso

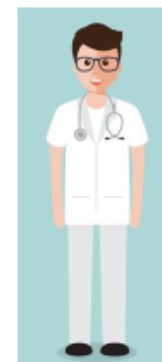

**EMERGENCISTA/ NEUROLOGISTA**

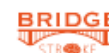

# SALA DE EMERGÊNCIA/ UTI/ UNIDADE DE AVC

## Medidas para pacientes não trombolisados

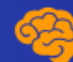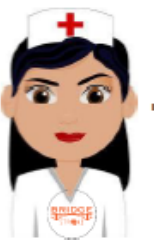

**ENFERMEIRA da SALA de EMERGÊNCIA**

- **ALERTAR o MÉDICO**
  - PA
  - Uso de **Antiplaquetário**

- **CHECAR e LEMBRAR**
  - Solicitação de **Fisioterapia**
  - Realização da **Triagem de Risco para Disfagia**
  - Solicitação de **Labs e Exames**

#### Monitorar/Cuidar

- Tratar se PAS > 220mmHg ou PAD > 120mmHg
- Considerar administração de antiplaquetários

#### Para todos os pacientes

- Triagem para disfagia\*
- Avaliação da fisioterapia\*
- Perfil lipídico
- Doppler de Carótidas ou Angio TC
- ECG - Fibrilação Atrial ou Flutter? (\* não se aplica a AIT)

- **PRESCREVER Antiplaquetário**

- **SOLICITAR**
  - Avaliação de **Fisioterapia**
  - Avaliação de **Disfagia**
  - **Labs e Exames**

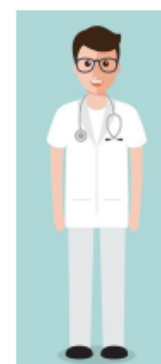

**NEUROLOGISTA**

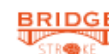

# BRIDGE

## STROKE

### 2º e 3º DIA

UNIDADE DE AVC/ UNIDADE DE INTERNAÇÃO

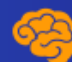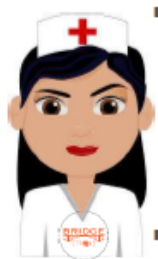

**ENFERMEIRA da INTERNAÇÃO**

- ALERTAR MÉDICO
  - Necessidade de **Profilaxia para TVP**

- CHECAR
  - Avaliação da **Fisioterapia** realizada?
  - Avaliação da **Fono** realizada?

| 2º DIA                                                                                                                                                           | 3º DIA |
|------------------------------------------------------------------------------------------------------------------------------------------------------------------|--------|
| Cuidado                                                                                                                                                          |        |
| <input type="checkbox"/> Paciente restrito ao leito?<br>↳ Considere Profilaxia medicamentosa ou mecânica<br><input type="checkbox"/> Checar TC de controle ou RM |        |
| Reabilitação                                                                                                                                                     |        |
| <input type="checkbox"/> Avaliação Fonoaudiológica realizada?<br><input type="checkbox"/> Avaliação Fisioterapêutica realizada?                                  |        |

- PRESCREVER **Heparina/ Clexane** ou

**Dispositivo de Compressão Pneumática**

- SOLICITAR
  - TC**

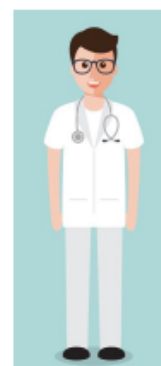

**NEUROLOGISTA**

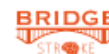

# UNIDADE DE INTERNAÇÃO

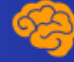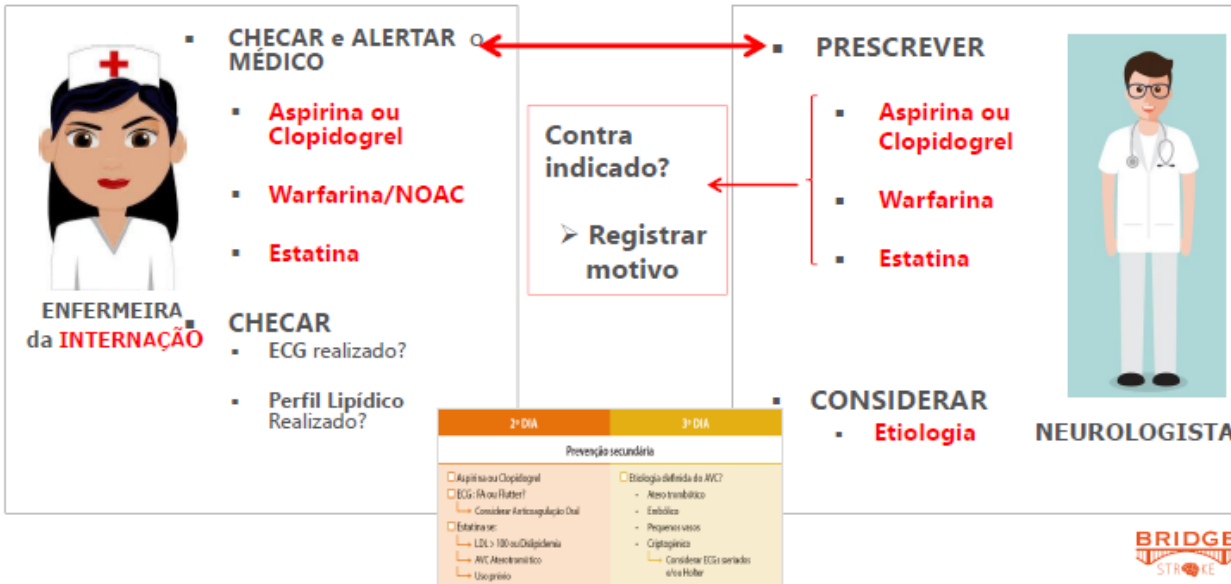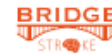

# UNIDADE DE INTERNAÇÃO

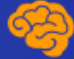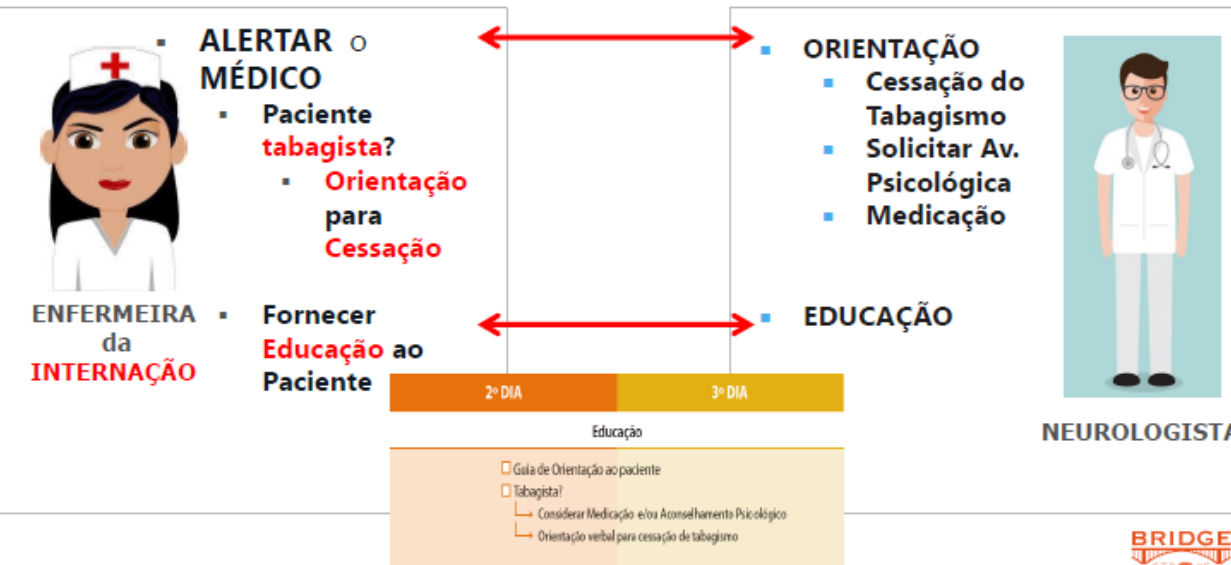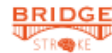

# BRIDGE

## STROKE

### Pré - Alta

#### UNIDADE DE INTERNAÇÃO

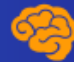



**ENFERMEIRA da INTERNAÇÃO**

**CHECAR e LEMBRAR**

- Cessaçãodo Tabagismo ok?
- Educação?
- Medicações?
- Encaminhamento p/ Físio e Fono

- ORIENTAR
- EDUCAR
- PRESCREVER
- ENCAMINHAR



**NEUROLOGISTA**

| PRÉ-ALTA                                                                                                  |                                                                                                                                                                                    |                                                                            |
|-----------------------------------------------------------------------------------------------------------|------------------------------------------------------------------------------------------------------------------------------------------------------------------------------------|----------------------------------------------------------------------------|
| Educação                                                                                                  | Prevenção secundária                                                                                                                                                               | Reabilitação                                                               |
| <input type="checkbox"/> Guia de Orientação<br><input type="checkbox"/> Medidas para Cessaçãodo Tabagismo | <input type="checkbox"/> Aspirina ou Clopidogrel<br><input type="checkbox"/> Anticoagulante Oral<br><input type="checkbox"/> Estatina<br><input type="checkbox"/> Antihipertensivo | <input type="checkbox"/> Encaminhamento para Fisioterapia e Fonoaudiologia |

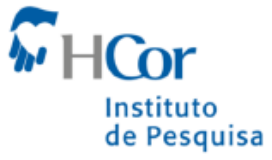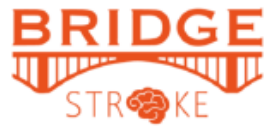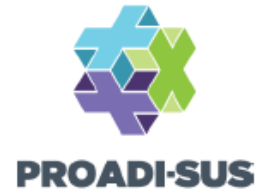





**eTable 1. Use of Evidence-Based Therapies During the Observational Phase**

| Endpoints                                                             | Intervention                | Control                     | All randomized sites        | All Sites Included in the Baseline Observational Phase | ICC* |
|-----------------------------------------------------------------------|-----------------------------|-----------------------------|-----------------------------|--------------------------------------------------------|------|
|                                                                       | (19 clusters; 460 patients) | (17 clusters; 364 patients) | (36 clusters; 824 patients) | (45 clusters; 946 patients)                            |      |
| Composite adherence score - mean (sd) <sup>a</sup>                    | 76.5 ± 19.8 (n=460)         | 75.1 ± 22.7 (n=364)         | 75.9 ± 21.1 (n=824)         | 75.3 ± 21.4 (n=946)                                    | 0.27 |
| Complete adherence to all acute and discharge therapies) <sup>b</sup> | 124/460 (27)                | 104/364 (28.6)              | 228/824 (27.7)              | 261/946 (27.6)                                         | 0.18 |
| Acute Interventions during first 48 hours                             |                             |                             |                             |                                                        |      |
| Rt-PA <sup>c</sup>                                                    | 50/140 (35.7)               | 53/122 (43.4)               | 103/262 (39.3)              | 107/292 (36.6)                                         | 0.37 |
| Global Rt-PA <sup>d</sup>                                             | 56/323 (17.3)               | 65/417 (15.6)               | 121/740 (16.4)              | 127/843 (15.1)                                         | 0.08 |
| Rt-PA within 3 hours <sup>e</sup>                                     | 18/90 (20)                  | 21/95 (22.1)                | 39/185 (21.1)               | 41/204 (20.1)                                          | 0.03 |
| Door-to-needle time < 60 min                                          | 26/65 (40)                  | 25/56 (44.6)                | 51/121 (42.1)               | 56/127 (44.1)                                          | 0.07 |
| Door-to-needle time < 45 min                                          | 15/56 (26.8)                | 22/65 (33.8)                | 37/121 (30.6)               | 42/127 (33.1)                                          | 0.11 |
| Early Antithrombotics                                                 | 432/450 (96)                | 329/361 (91.1)              | 761/811 (93.8)              | 871/932 (93.5)                                         | 0.05 |
| DVT Prophylaxis                                                       | 126/257 (49)                | 115/213 (54)                | 241/470 (51.3)              | 280/536 (52.2)                                         | 0.51 |
| Discharge Interventions                                               |                             |                             |                             |                                                        |      |
| Antithrombotics                                                       | 430/450 (95.6)              | 333/362 (92)                | 763/812 (94)                | 868/933 (93)                                           | 0.05 |
| Anticoagulants for AF or Flutter                                      | 33/41 (80.5)                | 9/18 (50)                   | 42/59 (71.2)                | 46/63 (73)                                             | 0.00 |
| Statins in patients with LDL > 100 or not documented                  | 308/352 (87.5)              | 236/301 (78.4)              | 544/653 (83.3)              | 628/758 (82.8)                                         | 0.12 |
| Smoking Cessation Education                                           | 54/81 (66.7)                | 33/48 (68.8)                | 87/129 (67.4)               | 90/138 (65.2)                                          | 0.27 |
| Assessment for Rehabilitation                                         | 231/307 (75.2)              | 158/211 (74.9)              | 389/518 (75.1)              | 438/600 (73)                                           | 0.13 |
| Dysphagia Screening                                                   | 216/390 (55.4)              | 180/304 (59.2)              | 396/694 (57.1)              | 427/775 (55.1)                                         | 0.58 |
| Antihypertensives for patients with hypertension                      | 237/272 (87.1)              | 264/328 (80.5)              | 501/600 (83.5)              | 563/683 (82.4)                                         | 0.10 |

Data are presented as n/N (%)

ICC denotes intracluster correlation coefficient Rt-PA denotes intravenous recombinant plasminogen activator. DVT denotes deep venous thrombosis. LDL denotes low-density lipoprotein. AF denotes Atrial Fibrillation.

(\*) Calculation didn't considered allocated to intervention or control group and was based on the full sample (45 clusters and 946 patients)

<sup>a</sup>Composite adherence score: early antithrombotics, Rt-PA within therapeutic window, DVT prophylaxis, door-to-needle time < 60 min, dysphagia screening, assessment for rehabilitation, antithrombotics at discharge, anticoagulants for atrial fibrillation or flutter, statins in patients with LDL ≥100mg/dL or not documented, smoke cessation education

<sup>b</sup>Complete adherence to all acute and discharge therapies: early antithrombotics, Rt-PA within therapeutic window, DVT prophylaxis, door-to-needle time < 60 min, dysphagia screening, assessment for rehabilitation, antithrombotics at discharge, anticoagulants for atrial fibrillation or flutter, statins LDL ≥100mg/dL or not documented, smoke cessation education.

<sup>c</sup>RtPA within therapeutic window (patients who arrive at the hospital within 3.5hours of symptoms onset and are treated within 4.5 hours).

<sup>d</sup>Global RtPa – patients within 24 hours of symptoms who receive RtPA if not contraindicated except for the therapeutic window.

<sup>e</sup>Rt-PA within 3 hours (patients who arrived within 2 hours of symptom and treated within 3h of symptom onset)

**eTable 2. Adherence to the Multifaceted Quality Improvement Intervention**

| <b>Proposed Tools and Techniques</b>                                                         | <b>Adherence<br/>n/N (%)</b> |
|----------------------------------------------------------------------------------------------|------------------------------|
| Case management <sup>a</sup>                                                                 | 18/19 (94.7)                 |
| Audit and Feedback <sup>b</sup>                                                              | 18/19 (94.7)                 |
| Educational Materials (Including Treatment Algorithm) during the First 48 hours <sup>c</sup> | 539/817 (66)                 |
| Educational Materials (Including Treatment Algorithm) until discharge <sup>d</sup>           | 519/817 (63.5)               |

<sup>a</sup> Case Management required that the assigned leader provide evidence for training the nurses involved in patients care.

<sup>b</sup> Audit and Feedback required that the principal investigator and leader case manager answer to the feedback report provided by the coordinating center and attend a web or phone call to discuss the findings.

<sup>c</sup> When adherence is adjusted to the patients from the clusters that adhered to the first two proposed tools the result is 539/774 (69.6).

<sup>d</sup> When adherence is adjusted to the patients from the clusters that adhered to the first two proposed tools the result is 519/774 (67.1)

**eTable 3. Results of Quality Improvement Intervention on Use of Evidence-Based Therapies for Patients With Acute Ischemic Stroke**

|                                                                    | Intervention                   | Control                        | Mean difference<br>[95%CI] | P<br>value | ICC <sup>g</sup> |
|--------------------------------------------------------------------|--------------------------------|--------------------------------|----------------------------|------------|------------------|
|                                                                    | (19 clusters;<br>711 patients) | (17 clusters;<br>723 patients) |                            |            |                  |
| <b>Primary Endpoint</b>                                            |                                |                                |                            |            |                  |
| Composite adherence score - mean (sd) <sup>a</sup>                 | 84.6 ± 19.8 (n=711)            | 76.7 ± 17.8 (n=723)            | 5.24 [-2.92-13.40]         | 0.20       | 0.363            |
| <b>Secondary Endpoints</b>                                         |                                |                                |                            |            |                  |
| Complete adherence to all acute and specified discharge therapies) | 320/711 (45)                   | 149/723 (20.6)                 | 3.17 [1.49—6.73]           | <0.01      | 0.239            |
| Rt-PA                                                              | 122/222 (55)                   | 107/268 (39.9)                 | 2.77 [1.31-5.82]           | 0.01       | 0.169            |
| Door-to-needle time < 60 min                                       | 84/145 (57.9)                  | 59/121 (48.8)                  | 2.47 [0.97-6.28]           | 0.06       | 0.158            |
| Early Antithrombotics                                              | 658/705 (93.3)                 | 676/719 (94)                   | 0.61 [0.26-1.44]           | 0.26       | 0.181            |
| Prophylaxis for DVT                                                | 313/433 (72.3)                 | 228/451 (50.6)                 | 2.48 [0.92-6.72]           | 0.07       | 0.36             |
| Discharge therapies                                                |                                |                                |                            |            |                  |
| Antithrombotics                                                    | 656/705 (93)                   | 683/722 (94.6)                 | 0.57 [0.21-1.55]           | 0.27       | 0.275            |
| Anticoagulants for AF or Flutter                                   | 103/136 (75.7)                 | 72/90 (80)                     | 0.94 [0.30-2.98]           | 0.92       | 0.117            |
| LDL > 100 or not documented                                        | 536/590 (90.8)                 | 567/627 (90.4)                 | 0.87 [0.49-1.57]           | 0.65       | 0.085            |
| Smoking Cessation Education                                        | 78/109 (71.6)                  | 77/158 (48.7)                  | 3.83 [1.17-12.54]          | 0.03       | 0.289            |
| Assessed for Rehabilitation                                        | 620/711 (87.2)                 | 574/723 (79.4)                 | 1.92 [0.58-6.33]           | 0.28       | 0.457            |
| Dysphagia Evaluation                                               | 577/711 (81.2)                 | 460/723 (63.6)                 | 2.82 [0.71-11.24]          | 0.14       | 0.547            |
| Global Rt-PA                                                       | 145/538 (27%)                  | 121/602 (20.1)                 | 2.07 [1.05-4.09]           | 0.04       | 0.173            |
| Door-to-needle time < 45 min                                       | 59/145 (40.7)                  | 35/121 (28.9)                  | 1.86 [0.85-4.09]           | 0.12       | 0.037            |
| Antihypertensive                                                   | 422/540 (78.1)                 | 450/530 (84.9)                 | 0.74 [0.33-1.65]           | 0.46       | 0.233            |

Data are presented as n (N° of Events)/N (Total Patients) (%), except for the composite adherence score.

Abbreviations: OR, denotes odds ratio; CI denotes confidence interval; ICC denotes intracluster correlation coefficient; Rt-PA denotes intravenous recombinant plasminogen activator; DVT denotes deep venous thrombosis, AF denotes atrial fibrillation.

<sup>a</sup>Composite adherence score: early antithrombotics, Rt-PA within therapeutic window, DVT prophylaxis, door-to-needle time < 60 min, dysphagia screening, assessment for rehabilitation, antithrombotics at discharge, anticoagulants for atrial fibrillation or flutter, LDL >= 100 or not documented (statins), smoke cessation education.

<sup>b</sup>Mean difference and 95% CI

<sup>c</sup>Patients who received all eligible therapies in an “All or None” model: antithrombotics in 48 hours, Rt-PA within therapeutic window, DVT prophylaxis, door-to-needle time < 60 min, dysphagia screening, assessment for rehabilitation, antithrombotics at discharge, anticoagulants for atrial.

<sup>d</sup>RtPA within therapeutic window (who arrive within 3.5 hours of symptoms onset and are treated within 4.5 hours)

<sup>e</sup>Global Rt-PA rates: Rt-PA delivered in patients who arrive within 24 hours of symptoms and have no contraindications.

<sup>f</sup>Rt-PA within 3 hours: patients who arrived within 2h of symptoms and are treated within 3h.

<sup>g</sup>Estimate from mixed logistic regression model considering group (Intervention and Control) adjusted by cluster observational phase mean endpoint.

**eTable 4. Results of Quality Improvement Intervention on Use of Evidence-Based Therapies for Patients with Transient Ischemic Attack**

|                                                          | Intervention                   | Control                       | Mean difference<br>[95%CI] | P value | ICC <sup>g</sup> |
|----------------------------------------------------------|--------------------------------|-------------------------------|----------------------------|---------|------------------|
|                                                          | (19 clusters;<br>106 patients) | (17 clusters;<br>84 patients) |                            |         |                  |
| <b>Primary Endpoint</b>                                  |                                |                               |                            |         |                  |
| Composite adherence score - mean (sd) <sup>a</sup>       | 90.3 ± 21.3<br>(n=106)         | 87.1 ± 20.7<br>(n=84)         | 3.08 [-5.68-11.83]         | 0.48    | 0.122            |
| <b>Secondary Endpoints</b>                               |                                |                               |                            |         |                  |
| Complete adherence to all acute and discharge therapies) | 82/106 (77.4)                  | 54/84 (64.3)                  | 2.14 [0.85-5.39]           | 0.11    | 0.13             |
| Early Antithrombotic                                     | 101/106 (95.3)                 | 80/84 (95.2)                  | 0.61 [0.13-2.84]           | 0.53    | 0.031            |
| Discharge therapies                                      |                                |                               |                            |         |                  |
| Antithrombotic                                           | 95/106 (89.6)                  | 76/84 (90.5)                  | 0.82 [0.31-2.20]           | 0.70    | 0                |
| Oral Anticoagulants for AF or Flutter                    | 8/10 (80)                      | 5/7 (71.4)                    | 1.56 [0.09-28.3]*          | 0.99*   | -                |
| LDL > 100 or not documented                              | 77/85 (90.6)                   | 64/74 (86.5)                  | 0.89 [0.29-2.78]           | 0.84    | 0                |
| Smoking Cessation Education                              | 15/20 (75)                     | 5/11 (45.5)                   | 3.01 [0.61-14.73]          | 0.17    | 0                |
| Antihypertensive                                         | 57/82 (69.5)                   | 49/56 (87.5)                  | 0.28 [0.06-1.29]           | 0.10    | 0.262            |
| (*) Fisher exact test                                    |                                |                               |                            |         |                  |

Data are presented as n (N° of Events)/N (Total Patients) (%), except for the composite adherence score.

Abbreviations: OR, denotes odds ratio; CI denotes confidence interval; ICC denotes intracluster correlation coefficient; Rt-PA denotes intravenous recombinant plasminogen activator; DVT denotes deep venous thrombosis, AF denotes atrial fibrillation.

<sup>a</sup>Composite adherence score: early antithrombotics, Rt-PA, DVT prophylaxis, door-to-needle time < 60 min, dysphagia screening, assessment for rehabilitation, antithrombotics at discharge, anticoagulants for atrial fibrillation or flutter, LDL >= 100 or not documented (statins), smoke cessation education.

<sup>b</sup>Mean difference and 95% CI

<sup>c</sup>Patients who received all eligible therapies in an “All or None” model: antithrombotics in 48 hours, Rt-PA within therapeutic window, DVT prophylaxis, door-to-needle time < 60 min, dysphagia screening, assessment for rehabilitation, antithrombotics at discharge, anticoagulants for atrial.

<sup>d</sup>RtPA within therapeutic window (patients who arrive within 3.5 hours of symptoms onset and are treated within 4.5 hours)

<sup>e</sup>Global Rt-PA rates: Rt-PA delivered in patients who arrive within 24 hours of symptoms and have no contraindications.

<sup>f</sup>Rt-PA within 3 hours: patients who arrived within 2h of symptoms and are treated within 3h.

<sup>g</sup>Estimate from mixed logistic regression model considering group (Intervention and Control) adjusted by cluster observational phase mean endpoint.

**eTable 5. Results of Quality Improvement Intervention on Use of Evidence-Based Therapies**

| Endpoints                                                                  | Intervention                | Control                     | OR 95% CI                        | P value | ICC <sup>9</sup> |
|----------------------------------------------------------------------------|-----------------------------|-----------------------------|----------------------------------|---------|------------------|
|                                                                            | (19 clusters; 817 patients) | (17 clusters; 807 patients) |                                  |         |                  |
| <b>Composite adherence score - mean (sd)<sup>a</sup></b>                   | 85.3 (20.1)                 | 77.8 (18.4)                 | 3.15[-4.88 – 11.19] <sup>b</sup> | .43     | 0.318            |
| <b>Complete adherence to all acute and discharge therapies<sup>c</sup></b> | 402/817 (49.2)              | 203/807 (25.2)              | 2.30 [1.08-4.91]                 | .03     | 0.23             |
| <b>Acute therapies during first 48 hours</b>                               |                             |                             |                                  |         |                  |
| Rt-PA <sup>d</sup>                                                         | 122/222 (55.0)              | 107/268 (39.9)              | 2.84 [1.49-5.39]                 | <.01    | 0.09             |
| Global Rt-PA <sup>e</sup>                                                  | 145/538 (27.0)              | 121/602 (20.1)              | 2.03 [1.03 – 3.98]               | .04     | 0.15             |
| Rt-PA within 3 hours <sup>f</sup>                                          | 69/123 (56.1)               | 47/143 (32.9)               | 3.03 [1.34-6.65]                 | .01     | 0.12             |
| Door-to-needle time < 60 min                                               | 84/145 (57.9)               | 59/121 (48.8)               | 2.96 [1.22 --7.16]               | .02     | 0.116            |
| Door-to-needle time < 45 min                                               | 59/145 (40.7)               | 35/121 (28.9)               | 2.05 [0.93 - -4.52]              | .08     | 0.02             |
| Early Antithrombotic Agents                                                | 759/811 (93.6)              | 756/803 (94.1)              | 0.54 [0.24-1.19]                 | .13     | 0.149            |
| Prophylaxis for DVT                                                        | 326/450 (72.4)              | 234/466 (50.2)              | 2.56 [1.01-6.48]                 | .05     | 0.304            |
| <b>Discharge therapies</b>                                                 |                             |                             |                                  |         |                  |
| Antithrombotics                                                            | 751/811 (92.6)              | 759/806 (94.2)              | 0.53 [0.23-1.22]                 | .13     | 0.194            |
| Oral Anticoagulants for AF or Flutter                                      | 111/146 (76.0)              | 77/97 (79.4)                | 1.14 [0.48-2.68]                 | .77     | 0.02             |
| LDL≥100mg/dL or not documented                                             | 613/675 (90.8)              | 631/701 (90)                | 0.87 [0.51-1.49]                 | .61     | 0.06             |
| Smoke Cessation Education                                                  | 93/129 (72.1)               | 82/169 (48.5)               | 3.18 [1.00-10.11]                | .05     | 0.276            |
| Assessed for Rehabilitation                                                | 620/711 (87.2)              | 574/723 (79.4)              | 1.59 [0.50-5.05]                 | .43     | 0.417            |
| Dysphagia Screening                                                        | 577/711 (81.2)              | 460/723 (63.6)              | 2.36 [0.57-9.74]                 | .24     | 0.54             |
| Antihypertensive                                                           | 479/622 (77.0)              | 499/586 (85.2)              | 0.82 [0.40-1.68]                 | .59     | 0.184            |

Data are presented as n (N° of Events)/N (Total Patients) (%), except for the composite adherence score.

Abbreviations: OR, denotes odds ratio; CI denotes confidence interval; ICC denotes intracluster correlation coefficient; Rt-PA denotes intravenous recombinant plasminogen activator; DVT denotes deep venous thrombosis, AF denotes atrial fibrillation.

<sup>a</sup>Composite adherence score: early antithrombotics, Rt-PA, DVT prophylaxis, door-to-needle time < 60 min, dysphagia screening, assessment for rehabilitation, antithrombotics at discharge, anticoagulants for atrial fibrillation or flutter, LDL >= 100 or not documented (statins), smoke cessation education.

<sup>b</sup>Mean difference and 95% CI

<sup>c</sup>Patients who received all eligible therapies in an “All or None” model: antithrombotics in 48 hours, Rt-PA, DVT prophylaxis, door-to-needle time < 60 min, dysphagia screening, assessment for rehabilitation, antithrombotics at discharge, anticoagulants for atrial.

<sup>d</sup>RtPA within therapeutic window (who arrive within 3.5 hours of symptoms onset and are treated within 4.5 hours)

<sup>e</sup>Global Rt-PA rates: Rt-PA delivered in patients who arrive within 24 hours of symptoms and have no contraindications.

<sup>f</sup>Rt-PA within 3 hours: patients who arrived within 2h of symptoms and are treated within 3h.

<sup>g</sup>Estimative from mixed logistic regression model considering group (Intervention and Control) adjusted by cluster observational phase mean endpoint.
