# Supplementary material
Source: PubMed Central journal article supplement (PMC6692700)
Supplement: jamaneurol-76-932-s003.pdf [file jamaneurol-76-932-s003.pdf]

## Data Sharing Statement

Machline-Carrion MJ, et al. Effect of a Quality Improvement Intervention on Adherence to Therapies for Patients With Acute Ischemic Stroke and Transient Ischemic Attack: A Cluster Randomized Clinical Trial. *JAMA Neurol*. Published May 6, 2019.  
doi: 10.1001/jamaneurol.2019.1012

### Data

**Data available:** Yes

**Data types:** Deidentified participant data

**How to access data:** Request for data must be sent to mjuliacarrion@gmail.com

**When available:** beginning date: 07-31-2020, end date: 07-01-2021

### Supporting Documents

**Document types:** None

### Additional Information

**Who can access the data:** Researchers whose proposed use has been approved

**Types of analyses:** for purposes that compliment the objectives from the study

**Mechanisms of data availability:** after approval of a proposal and with investigator support
